# Supplementary material
Source: PubMed Central journal article supplement (PMC6139294)

# CHEMISTRY

## A **European** Journal

### Supporting Information

#### **Investigations on Gold-Catalyzed Thioalkyne Activation Toward Facile Synthesis of Ketene Dithioacetals**

Xiaohan Ye<sup>+, [a]</sup> Jin Wang<sup>+, [a]</sup> Shengtao Ding<sup>+, [a]</sup> Seyedmorteza Hosseini,<sup>[a]</sup> Lukasz Wojtas,<sup>[a]</sup> Novruz G. Akhmedov,<sup>[b]</sup> and Xiaodong Shi<sup>\*[a]</sup>

chem\_201702710\_sm\_miscellaneous\_information.pdf

|                                             |     |
|---------------------------------------------|-----|
| I. General Methods and Materials            | S2  |
| II. Screen Table                            | S5  |
| II. ORTEP Drawing of the Crystal Structures | S7  |
| III. NMR analysis                           | S13 |
| V. Compounds Characterization               | S18 |
| VI. NMR Spectra Data                        | S32 |

# I. General Methods and Materials

All of the reactions dealing with air and/or moisture-sensitive compounds were carried out under an atmosphere of argon using oven/flame-dried glassware and standard syringe/septa techniques. Unless otherwise noted, all commercial reagents and solvents were obtained from the commercial provider and used without further purification.  $^1\text{H}$  NMR and  $^{13}\text{C}$  NMR spectra were recorded on Agilent 400 MHz spectrometers/ Varian 500 MHz spectrometers. Chemical shifts were reported relative to internal tetramethylsilane ( $\delta$  0.00 ppm) or  $\text{CDCl}_3$  ( $\delta$  7.26 ppm) for  $^1\text{H}$  and  $\text{CDCl}_3$  ( $\delta$  77.00 ppm) for  $^{13}\text{C}$ . Flash column chromatography was performed on 230-430 mesh silica gel. Analytical thin layer chromatography was performed with pre-coated glass baked plates (250 $\mu$ ) and visualized by fluorescence and by charring after treatment with potassium permanganate stain. HRMS were recorded on Agilent 6540 LC/QTOF spectrometer.

ESI-MS spectra were collected using a Thermo Scientific Orbitrap Q Extractive Plus (Bremen, Germany) in the positive ion mode. The samples were infused with a flow rate of 10  $\mu\text{L}/\text{min}$  and sprayed at a high voltage of 5 kV.

## 1.1 General procedure to synthesize thioalkyne

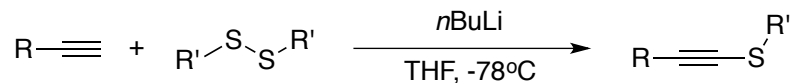

Thioalkynes were prepared according to known literatures. To a THF solution (50 mL) of alkyne (22 mmol, 1.1 eq) was added 9.6 mL *n*-BuLi (2.5 M in hexane, 24 mmol, 1.2 eq) dropwise at  $-78^\circ\text{C}$ . The reaction mixture was allowed to react at  $-78^\circ\text{C}$  for 1 h, then disulfide (20 mmol, 1 eq) in THF (10 mL) was added. The reaction mixture was brought up to RT and stirred for overnight (14 h). The reaction was quenched using sat.  $\text{K}_2\text{CO}_3$  solution, and organic layers was extracted three time with DCM. The combined organic solution was dried over  $\text{Na}_2\text{SO}_4$  and concentrated. Crude product was further purified by flash chromatography using pure hexane as elute.

## 1.2 General procedure to synthesize Allyl phenyl sulfide

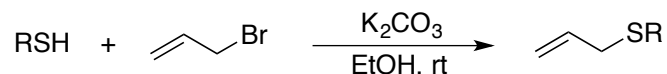

To a EtOH solution (10 mL) of thiol (5 mmol, 1 eq) and allyl bromide (6 mmol, 1.2 eq) was added  $\text{K}_2\text{CO}_3$  in one portion. The reaction mixture was allowed to react overnight (14 h). The reaction solution was diluted with water and extracted with DCM three times. The combined organic solution was dried over  $\text{Na}_2\text{SO}_4$  and concentrated. Crude product was further purified by flash chromatography using 100:1 hexane/ethyl acetate as elute.

### 1.3 General procedure for gold catalyzed C-nucleophile addition to thioalkyne

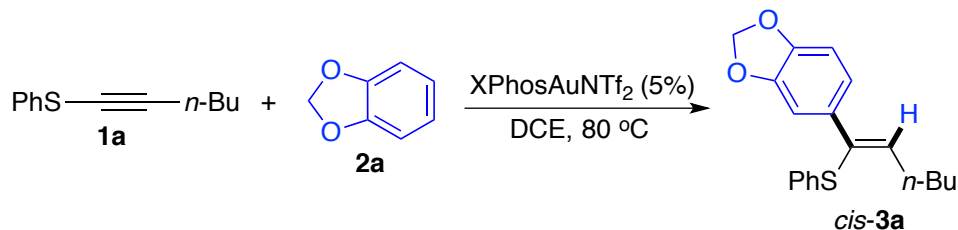

To a DCE solution (1.2 mL) of thioalkyne (0.2 mmol, 1 eq) and benzodioxole (0.6 mmol, 3 eq) was added Au catalyst (0.01 mmol, 0.05 eq) in one portion. The reaction vial was flushed with Argon, and the reaction mixture was allowed to react at 80 °C for 10 h. The reaction solution was filtered through a short pad of silica gel, and concentrated. Crude product was further purified by Flash Chromatography, preparative TLC or HPLC.

### 1.4 General procedure for gold catalyzed thioether addition to thioalkyne

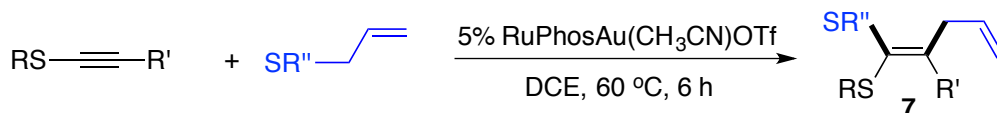

To a DCE solution (1.2 mL) of alkyne (0.2 mmol, 1 eq) was added thiophenol (0.2 mmol, 1 eq). Catalyst (0.01 mmol, 0.05 eq) was added in one portion if needed. The reaction vial was flushed with Argon, and the reaction mixture was allowed to react at designated temperature for 10 h. The reaction solution was filtered through a short pad of silica gel, and concentrated. Crude product was further purified by Flash Chromatography, preparative TLC or HPLC.

### 1.5 General procedure for gold catalyzed propargyl alcohol addition to thioalkyne

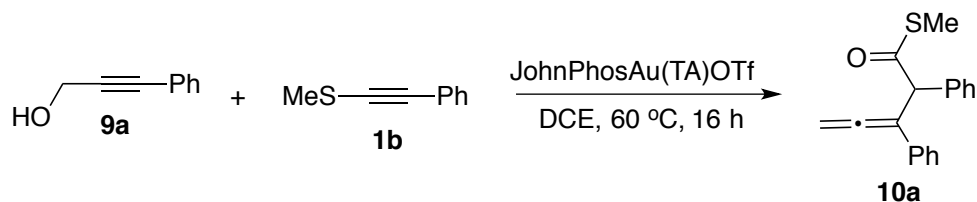

To a DCE solution (1.2 mL) of thioalkyne (0.2 mmol, 1 eq) and thioether (0.24 mmol, 1.2 eq) was added Au catalyst (0.01 mmol, 0.05 eq) in one portion. The reaction vial was flushed with Argon, and the reaction mixture was allowed to react at 60 °C for 6 h. The reaction solution was filtered through a short pad of silica gel, and concentrated. Crude product was further purified by preparative TLC.

## 1.6 General procedure for competing reaction between alkyne and thioalkyne

To a DCE solution (1.2 mL) of thioalkyne (0.2 mmol, 1 eq), phenylacetylene (0.2 mmol, 1 eq) and propargyl alcohol (0.2 mmol, 1 eq) was added Au catalyst (0.01 mmol, 0.05 eq) in one portion. The reaction vial was flushed with Argon, and the reaction mixture was allowed to react at 80 °C for 16 h. The reaction solution was filtered through a short pad of silica gel, and concentrated. Crude product was further purified by preparative TLC.

## II. Screening Table

### 2.1 Screening table for gold catalyzed C-nucleophile addition to thioalkyne

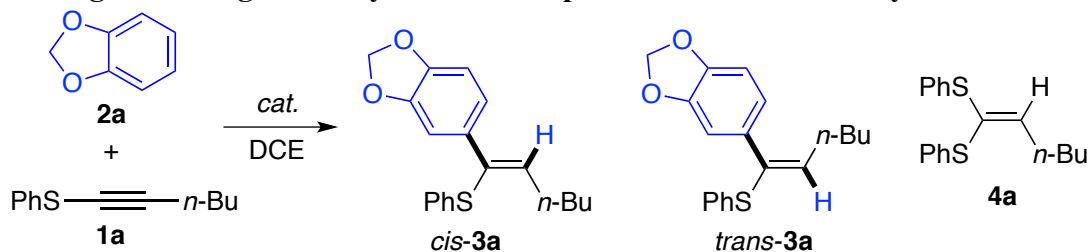

| Cat. and loading                                         | Temp (°C)        | Reaction time | Conv | Yield | cis/trans by dioxole peak |
|----------------------------------------------------------|------------------|---------------|------|-------|---------------------------|
| AgOTf+XPhosAuCl (0.05)                                   | 60               | 10 h          | 59%  | 31%   | 3.1:1                     |
| AgNTf <sub>2</sub> (0.05) + XPhosAuCl(0.05)              | 80               | 10 h          | 84%  | 59%   | 4.2:1                     |
| PPh <sub>3</sub> AuNTf <sub>2</sub> (0.05)               | 80               | 16 h          | 80%  | 52%   | 6.8:1                     |
| JohnPhosAuNTf <sub>2</sub> (0.05)                        | 80 °C            | 10 h          | 84%  | 59%   | 6.0:1                     |
| XPhosAuNTf <sub>2</sub> (0.05)                           | 80 °C            | 16 h          | 70%  | 64%   | 7.3:1                     |
| XPhosAuNTf <sub>2</sub> (0.05), degas                    | 80 °C            | 10 h          | 87%  | 51%   | 4.7:1                     |
| RuPhosAuNTf <sub>2</sub> (0.05)                          | 80 °C            | 6 h           | 77%  | 45%   | 6.7:1                     |
| IPrAuNTf <sub>2</sub> (0.05)                             | 80 °C            | 16 h          | 80%  | 59%   | 6.1:1                     |
| (ArO) <sub>3</sub> PAu(TA-Ph)OTf (0.05)                  | 80 °C            | 16 h          | <5%  | <5%   | NA                        |
| XPhosAuNTf <sub>2</sub> (0.05)                           | 70 °C            | 10 h          | 84%  | 51%   | 4.4:1                     |
| XPhosAuNTf <sub>2</sub> (0.05)                           | 60 °C            | 16 h          | 75%  | 51%   | 8.3:1                     |
| JohnPhosAu(CH <sub>3</sub> CN)OTf (0.05)                 | 60 °C            | 16 h          | 100% | 36%   | 4.4:1                     |
| JohnPhosAu(TA-Me)OTf (0.05)                              | 80 °C            | 16 h          | <5%  | <5%   | NA                        |
| JohnPhosAu(TA-Me)OTf + Cu(OTf) <sub>2</sub> (0.05+ 0.01) | 60 °C then 80 °C | 16 h, 10 h    | 38%  | 22%   | NA                        |
| JohnPhosAu(TA-Me)OTf + Ga(OTf) <sub>3</sub> (0.05+ 0.01) | 60 °C then 80 °C | 16 h, 10h     | <5%  | <5%   | NA                        |
| HOTf (0.05)                                              | 80 °C            | 16 h          | <5%  | <5%   | NA                        |
| Cu(OTf) <sub>2</sub> (0.05)                              | 80 °C            | 16 h          | 100% | 0%    | NA                        |
| AgOTf(0.05)                                              | 60               | 6 h           | 93%  | 47%   | 3.3:1                     |
| AgNTf <sub>2</sub> (0.05)                                | 80               | 6 h           | 92%  | 59%   | 4.8:1                     |

## 2.2 General procedure for gold catalyzed thioether addition to thioalkyne

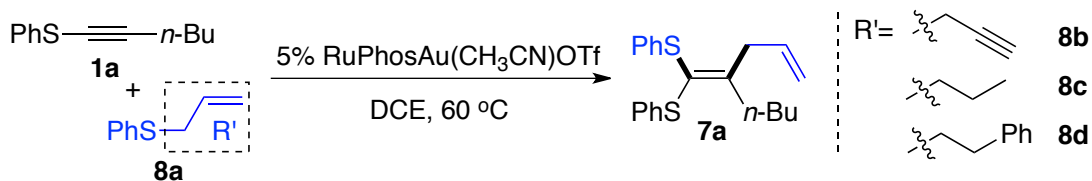

| Alternation from above conditions          | <b>1a</b> convn | yield <b>7a</b> |
|--------------------------------------------|-----------------|-----------------|
| none                                       | >95%            | 75%             |
| 5% Cu(OTf) <sub>2</sub> instead of [Au]    | >95%            | 39%             |
| 5% AgOTf instead of [Au]                   | >95%            | 49%             |
| [Au] = IPrAuNTf <sub>2</sub>               | >95%            | 60%             |
| R' = <i>n</i> -Pr, CH <sub>2</sub> CCH, Bn | <5%             | <5%             |
| Other catalysts: Pd, Ir, Ru, Rh, Pt, HOTf  | <20%            | <5%             |
| CyJohnPhosAu(CH <sub>3</sub> CN)OTf        | >95%            | 65%             |
| JohnPhosAu(CH <sub>3</sub> CN)OTf          | >95%            | 64%             |
| XJohnPhosAu(CH <sub>3</sub> CN)OTf         | >95%            | 61%             |
| PPh <sub>3</sub> Au(CH <sub>3</sub> CN)OTf | >95%            | 67%             |
| CyJohnPhosAuNTf <sub>2</sub>               | 46%             | 29%             |
| CyJohnPhosAu(TA-H)OTf                      | 62%             | 31%             |
| IPrAu(TA-H)OTf                             | 59%             | 36%             |

### III. ORTEP Drawing of the Crystal Structures

The X-ray diffraction data for **3d**, **6b** and **7p** were measured on Bruker D8 Venture PHOTON 100 CMOS system equipped with a Cu K $\alpha$  INCOATEC ImuS micro-focus source ( $\lambda = 1.54178$  Å). The diffraction data for **6a** was measured on Bruker Smart diffractometer with Apex2 detector and CuK $\alpha$  radiation. Indexing was performed using *APEX3* [1] (Difference Vectors method). Data integration and reduction were performed using SaintPlus 6.01 [2]. Absorption correction was performed by multi-scan method implemented in SADABS [3]. Space groups were determined using XPREP implemented in APEX3 [1]. Structures were solved using SHELXT and refined using SHELXL-2016 [4-7] (full-matrix least-squares on F<sup>2</sup>) through OLEX2 interface program [8]. All non-hydrogen atoms (except some of disordered) were refined anisotropically. Hydrogen atoms of -CH,-CH<sub>2</sub> and -CH<sub>3</sub> groups were placed in geometrically calculated positions and were included in the refinement process using riding model with isotropic thermal parameters: Uiso(H) = 1.2(1.5)Ueq(-CH,-CH<sub>2</sub>, (-CH<sub>3</sub>)). Crystal data and refinement conditions are shown in Tables 1-4.

**Notes: 3d:** The structure was refined as inversion twin, which improved weighting scheme parameters and R value. **6a and 6b:** Disordered anions were refined with restraints.

[1] Bruker (2016). *APEX3* (Version 2015.9). Bruker AXS Inc., Madison, Wisconsin, USA.

[2] Bruker (2016) SAINT V8.35A. Data Reduction Software.

[3] Sheldrick, G. M. (1996). *SADABS. Program for Empirical Absorption Correction*. University of Gottingen, Germany.

[4] G.M. Sheldrick (2015) "Crystal structure refinement with SHELXL", *Acta Cryst.*, C71, 3-8

[5] Sheldrick, G.M. (1990) *Acta Cryst.* A46, 467-473

[6] Sheldrick, G. M. (2008) *Acta Cryst.* A64, 112-122.

[7] Sheldrick, G. M. (2015) *Acta Cryst.* A71, 3-8

[8] Dolomanov, O.V.; Bourhis, L.J.; Gildea, R.J.; Howard, J.A.K.; Puschmann, H., OLEX2: A complete structure solution, refinement and analysis program (2009). *J. Appl. Cryst.*, 42, 339-341.



**Table 1 Crystal data and structure refinement for 7p.**

|                                             |                                                                |
|---------------------------------------------|----------------------------------------------------------------|
| Identification code                         | 7p                                                             |
| Empirical formula                           | C <sub>21</sub> H <sub>22</sub> Cl <sub>2</sub> S <sub>2</sub> |
| Formula weight                              | 409.40                                                         |
| Temperature/K                               | 100.05                                                         |
| Crystal system                              | monoclinic                                                     |
| Space group                                 | P2 <sub>1</sub> /c                                             |
| a/Å                                         | 6.3457(2)                                                      |
| b/Å                                         | 22.0777(6)                                                     |
| c/Å                                         | 14.2069(4)                                                     |
| α/°                                         | 90                                                             |
| β/°                                         | 95.9762(16)                                                    |
| γ/°                                         | 90                                                             |
| Volume/Å <sup>3</sup>                       | 1979.55(10)                                                    |
| Z                                           | 4                                                              |
| ρ <sub>calc</sub> /cm <sup>3</sup>          | 1.374                                                          |
| μ/mm <sup>-1</sup>                          | 4.915                                                          |
| F(000)                                      | 856.0                                                          |
| Crystal size/mm <sup>3</sup>                | 0.183 × 0.029 × 0.021                                          |
| Radiation                                   | CuKα (λ = 1.54178)                                             |
| 2θ range for data collection/°              | 7.428 to 155.294                                               |
| Index ranges                                | -8 ≤ h ≤ 7, -27 ≤ k ≤ 27, -17 ≤ l ≤ 17                         |
| Reflections collected                       | 30613                                                          |
| Independent reflections                     | 4109 [R <sub>int</sub> = 0.1149, R <sub>sigma</sub> = 0.0565]  |
| Data/restraints/parameters                  | 4109/0/229                                                     |
| Goodness-of-fit on F <sup>2</sup>           | 1.035                                                          |
| Final R indexes [I >= 2σ (I)]               | R <sub>1</sub> = 0.0443, wR <sub>2</sub> = 0.0826              |
| Final R indexes [all data]                  | R <sub>1</sub> = 0.0698, wR <sub>2</sub> = 0.0913              |
| Largest diff. peak/hole / e Å <sup>-3</sup> | 0.32/-0.29                                                     |

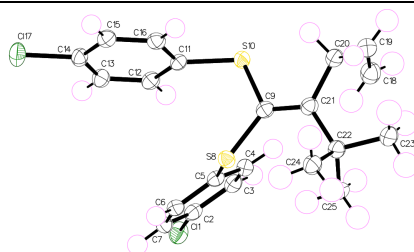

Fig. 1. Conformation and numbering scheme of molecule in asymmetric unit of **7p**. Thermal ellipsoids were drawn at 50% probability. CCDC# 1547919

**Table 2 Crystal data and structure refinement for 3d.**

|                                      |                                                               |
|--------------------------------------|---------------------------------------------------------------|
| Identification code                  | 3d                                                            |
| Empirical formula                    | C <sub>19</sub> H <sub>20</sub> O <sub>2</sub> S              |
| Formula weight                       | 312.41                                                        |
| Temperature/K                        | 100(2)                                                        |
| Crystal system                       | monoclinic                                                    |
| Space group                          | Cc                                                            |
| a/Å                                  | 15.0719(4)                                                    |
| b/Å                                  | 9.4326(2)                                                     |
| c/Å                                  | 11.4784(3)                                                    |
| α/°                                  | 90                                                            |
| β/°                                  | 92.5702(12)                                                   |
| γ/°                                  | 90                                                            |
| Volume/Å <sup>3</sup>                | 1630.21(7)                                                    |
| Z                                    | 4                                                             |
| ρ <sub>calc</sub> /g/cm <sup>3</sup> | 1.273                                                         |
| μ/mm <sup>-1</sup>                   | 1.791                                                         |
| F(000)                               | 664.0                                                         |
| Crystal size/mm <sup>3</sup>         | 0.305 × 0.097 × 0.09                                          |
| Radiation                            | CuKα (λ = 1.54178)                                            |
| 2θ range for data collection/°       | 11.068 to 154.112                                             |
| Index ranges                         | -16 ≤ h ≤ 18, -11 ≤ k ≤ 11, -14 ≤ l ≤ 14                      |
| Reflections collected                | 11967                                                         |
| Independent reflections              | 3082 [R <sub>int</sub> = 0.0363, R <sub>sigma</sub> = 0.0347] |
| Data/restraints/parameters           | 3082/2/203                                                    |
| Goodness-of-fit on F <sup>2</sup>    | 1.099                                                         |
| Final R indexes [I ≥ 2σ (I)]         | R <sub>1</sub> = 0.0283, wR <sub>2</sub> = 0.0660             |
| Final R indexes [all data]           | R <sub>1</sub> = 0.0300, wR <sub>2</sub> = 0.0671             |

Largest diff. peak/hole / e Å<sup>-3</sup> 0.17/-0.23

Flack parameter 0.288(19)

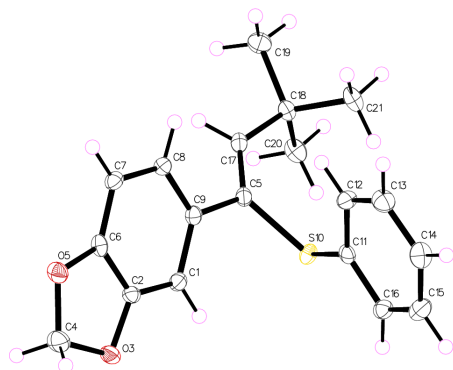

Fig.2. Conformation and numbering scheme of molecule in asymmetric unit of **3d**. Thermal ellipsoids were drawn at 50% probability. CCDC# 1547926

**Table 3 Crystal data and structure refinement for 6b.**

|                                                |                                                                   |
|------------------------------------------------|-------------------------------------------------------------------|
| Identification code                            | 6b                                                                |
| Empirical formula                              | $C_{43.5}H_{57}Au_2F_{7.5}N_{1.25}O_5P_2S_{3.5}$                  |
| Moiety formula                                 | $C_{41}H_{57}Au_2P_2S, 1.25(C_2F_6NO_4S_2)$                       |
| Formula weight                                 | 1387.98                                                           |
| Temperature/K                                  | 100.03                                                            |
| Crystal system                                 | triclinic                                                         |
| Space group                                    | P-1                                                               |
| a/Å                                            | 12.4159(6)                                                        |
| b/Å                                            | 14.0289(7)                                                        |
| c/Å                                            | 17.6541(8)                                                        |
| $\alpha/^\circ$                                | 108.043(2)                                                        |
| $\beta/^\circ$                                 | 93.939(2)                                                         |
| $\gamma/^\circ$                                | 115.751(2)                                                        |
| Volume/Å <sup>3</sup>                          | 2558.2(2)                                                         |
| Z                                              | 2                                                                 |
| $\rho_{\text{calc}}/\text{g/cm}^3$             | 1.802                                                             |
| $\mu/\text{mm}^{-1}$                           | 13.164                                                            |
| F(000)                                         | 1356.0                                                            |
| Crystal size/mm <sup>3</sup>                   | 0.21 × 0.15 × 0.03                                                |
| Radiation                                      | CuK $\alpha$ ( $\lambda = 1.54178$ )                              |
| 2 $\theta$ range for data collection/ $^\circ$ | 5.42 to 154.864                                                   |
| Index ranges                                   | -15 ≤ h ≤ 15, -17 ≤ k ≤ 17, -22 ≤ l ≤ 22                          |
| Reflections collected                          | 28501                                                             |
| Independent reflections                        | 10365 [ $R_{\text{int}} = 0.0621$ , $R_{\text{sigma}} = 0.0632$ ] |
| Data/restraints/parameters                     | 10365/832/833                                                     |
| Goodness-of-fit on F <sup>2</sup>              | 1.038                                                             |
| Final R indexes [ $I \geq 2\sigma(I)$ ]        | $R_1 = 0.0509$ , $wR_2 = 0.1348$                                  |
| Final R indexes [all data]                     | $R_1 = 0.0616$ , $wR_2 = 0.1418$                                  |
| Largest diff. peak/hole / e Å <sup>-3</sup>    | 2.78/-2.64                                                        |

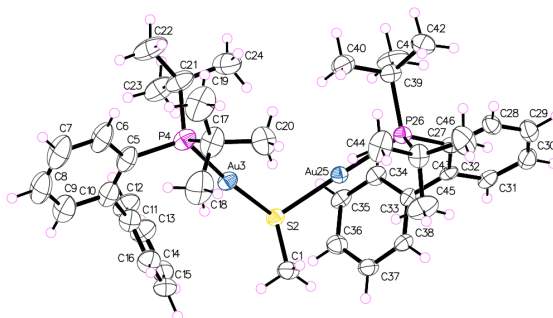

Fig.3. Conformation and numbering scheme of cation in 6b. Disordered anions were omitted for clarity. Thermal ellipsoids were drawn at 50% probability.

CCDC#1547929

**Table 4 Crystal data and structure refinement for 6a.**

|                                             |                                                                                                                                   |
|---------------------------------------------|-----------------------------------------------------------------------------------------------------------------------------------|
| Identification code                         | 6a                                                                                                                                |
| Empirical formula                           | C <sub>47.5</sub> H <sub>59.5</sub> Au <sub>2</sub> Cl <sub>1.5</sub> F <sub>3</sub> O <sub>3</sub> P <sub>2</sub> S <sub>2</sub> |
| Moiety formula                              | C <sub>46</sub> H <sub>59</sub> Au <sub>2</sub> P <sub>2</sub> S, CF <sub>3</sub> O <sub>3</sub> S, 0.5(CHCl <sub>3</sub> )       |
| Formula weight                              | 1308.62                                                                                                                           |
| Temperature/K                               | 298.15                                                                                                                            |
| Crystal system                              | monoclinic                                                                                                                        |
| Space group                                 | P2 <sub>1</sub> /n                                                                                                                |
| a/Å                                         | 24.5358(7)                                                                                                                        |
| b/Å                                         | 13.8415(4)                                                                                                                        |
| c/Å                                         | 30.5610(9)                                                                                                                        |
| α/°                                         | 90                                                                                                                                |
| β/°                                         | 100.8595(17)                                                                                                                      |
| γ/°                                         | 90                                                                                                                                |
| Volume/Å <sup>3</sup>                       | 10193.0(5)                                                                                                                        |
| Z                                           | 8                                                                                                                                 |
| ρ <sub>calc</sub> /cm <sup>3</sup>          | 1.705                                                                                                                             |
| μ/mm <sup>-1</sup>                          | 13.152                                                                                                                            |
| F(000)                                      | 5128.0                                                                                                                            |
| Crystal size/mm <sup>3</sup>                | 0.167 × 0.098 × 0.096                                                                                                             |
| Radiation                                   | CuKα (λ = 1.54178)                                                                                                                |
| 2θ range for data collection/°              | 4.248 to 142.782                                                                                                                  |
| Index ranges                                | -29 ≤ h ≤ 29, -16 ≤ k ≤ 15, -36 ≤ l ≤ 36                                                                                          |
| Reflections collected                       | 131865                                                                                                                            |
| Independent reflections                     | 19385 [R <sub>int</sub> = 0.0987, R <sub>sigma</sub> = 0.0565]                                                                    |
| Data/restraints/parameters                  | 19385/321/1185                                                                                                                    |
| Goodness-of-fit on F <sup>2</sup>           | 1.006                                                                                                                             |
| Final R indexes [I ≥ 2σ (I)]                | R <sub>1</sub> = 0.0384, wR <sub>2</sub> = 0.0784                                                                                 |
| Final R indexes [all data]                  | R <sub>1</sub> = 0.0705, wR <sub>2</sub> = 0.0910                                                                                 |
| Largest diff. peak/hole / e Å <sup>-3</sup> | 0.61/-0.79                                                                                                                        |

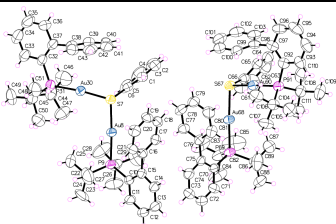

Fig.4. Conformation and numbering scheme of two symmetrically independent cations in 6a. Disordered anions were omitted for clarity. Thermal ellipsoids were drawn at 50% probability. CCDC#1547928

## **IV. NMR experiment**

### 3.1 NOE Study for the conformation analysis of cis-addition product 3c

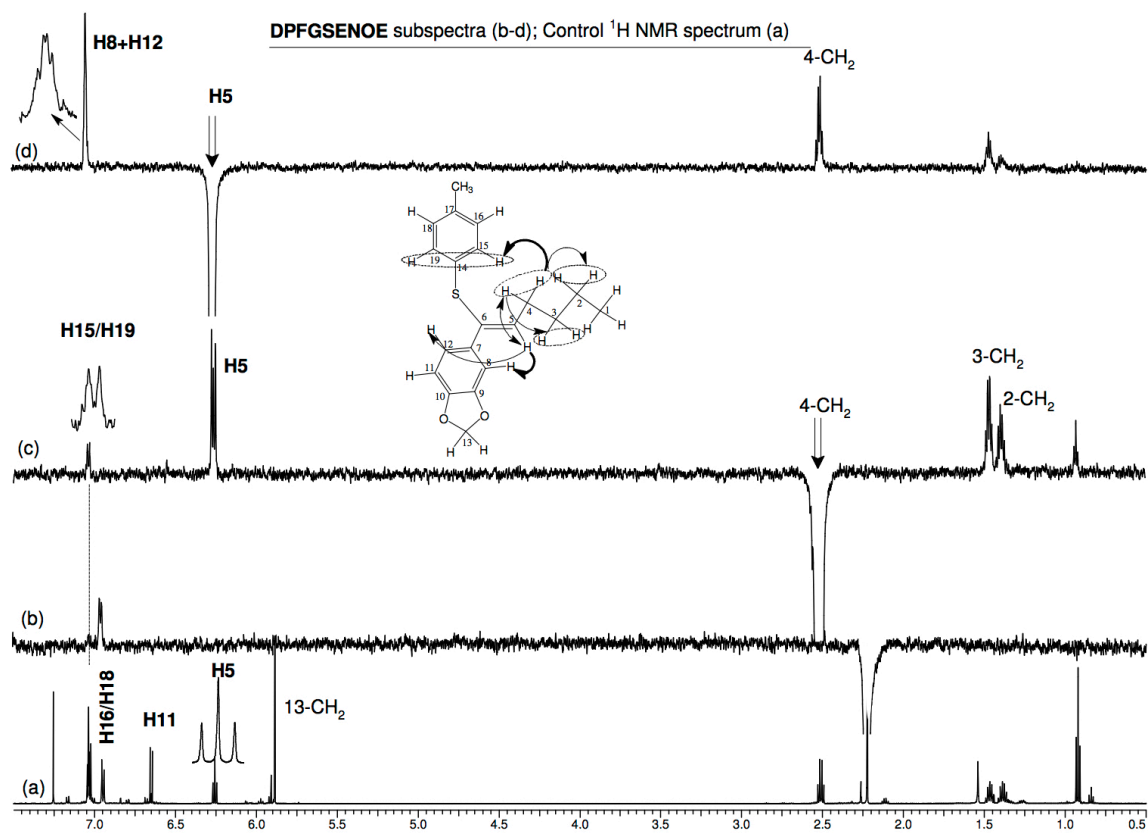

### 3.2 NOE Study for the conformation analysis of Z/E product 7d

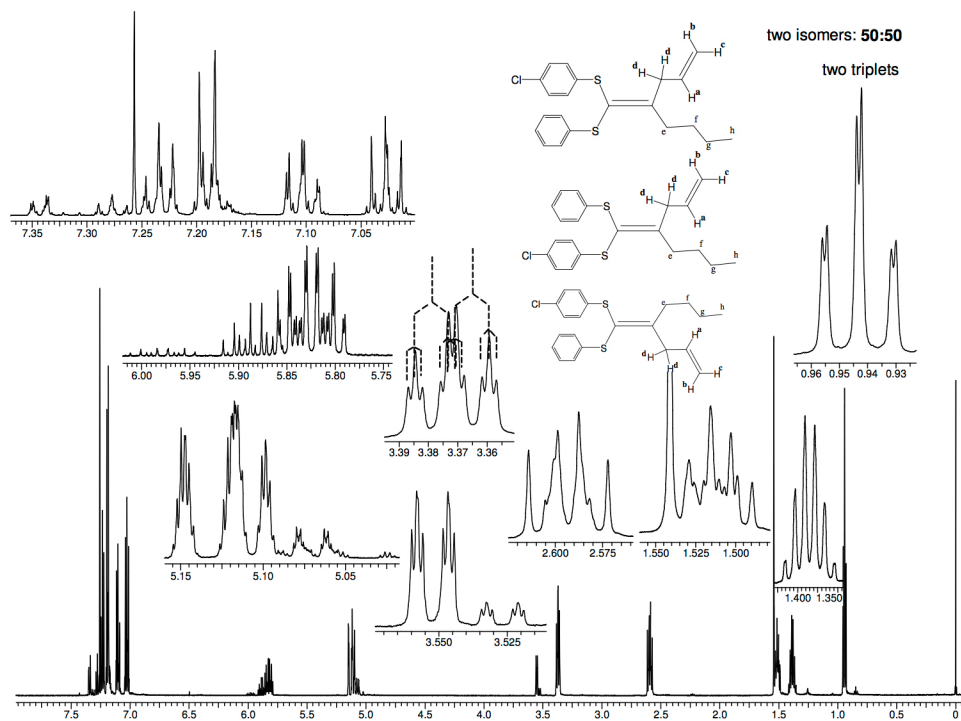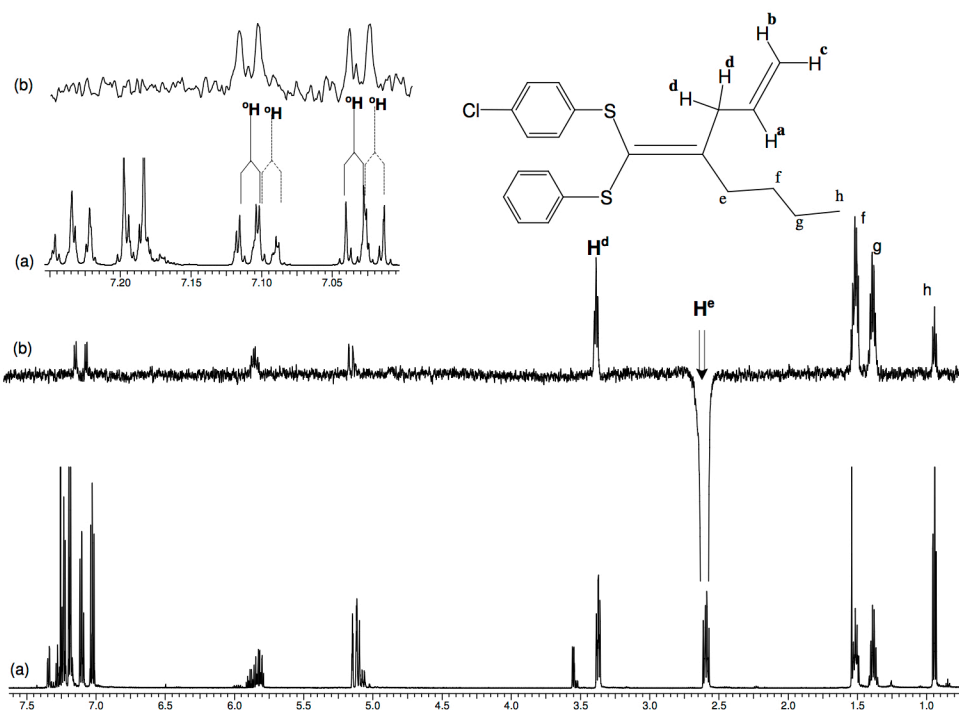



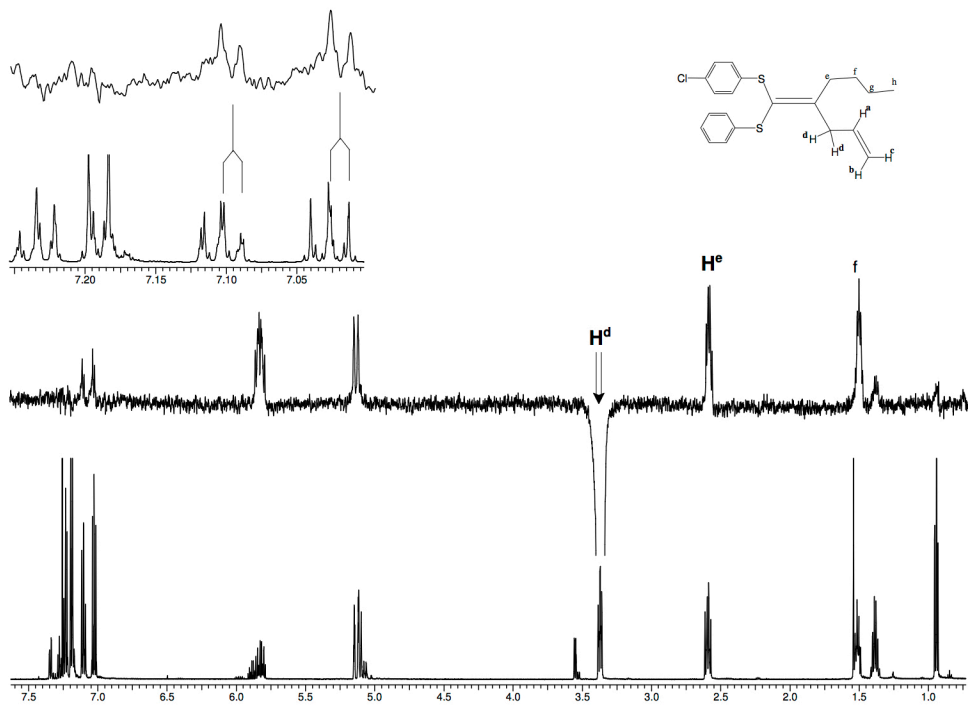

### 3.2 NOE Study for the conformation analysis of Z/E product 7j

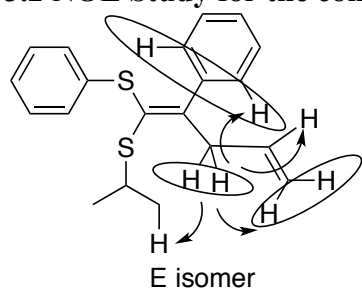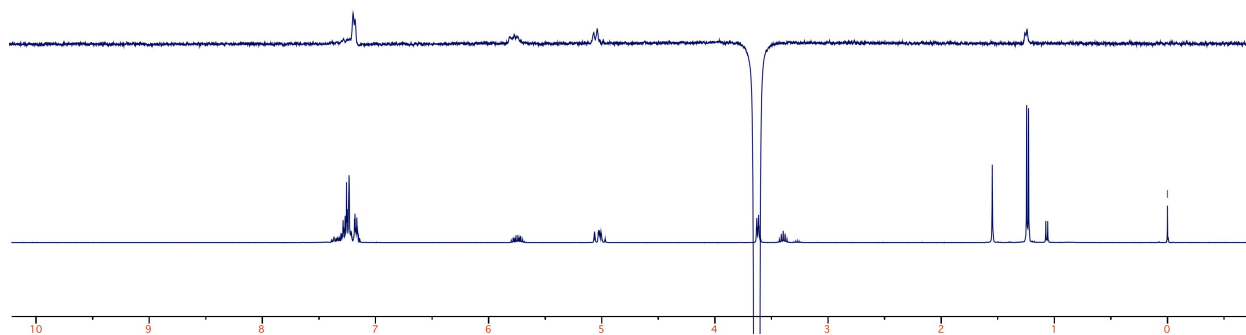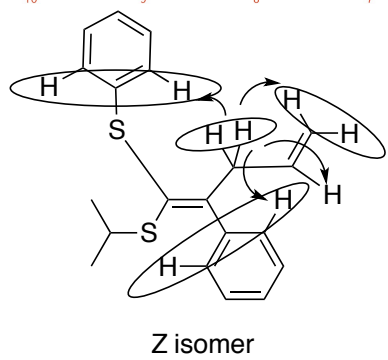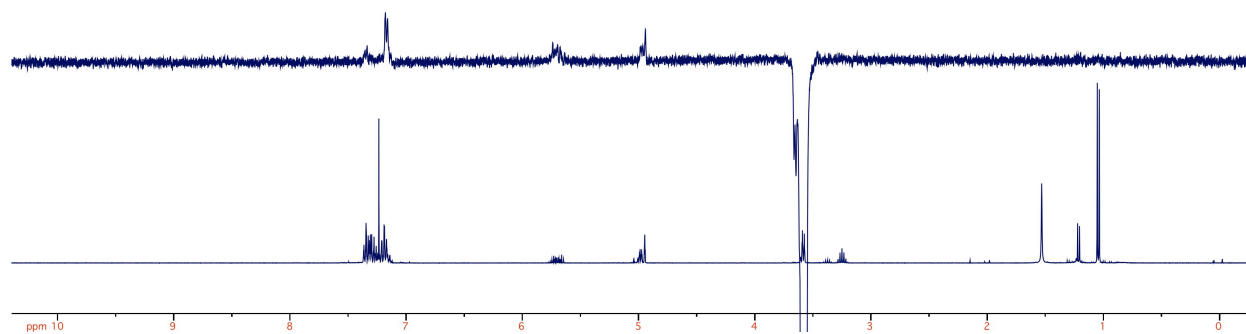

## V. Compound Characterization

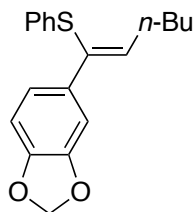

**3a**

### **(Z)-5-(1-(phenylthio)hex-1-en-1-yl)benzo[d][1,3]dioxole**

**3a** was prepared following the General Procedure **1.3** and purified by flash Chromatography (Hexane: Ether= 100:1) as pale yellow oil.

**<sup>1</sup>H-NMR** (400 MHz; CDCl<sub>3</sub>): δ 7.14-7.13 (m, 4H), 7.06-7.02 (m, 3H), 6.65 (d, *J* = 8.6 Hz, 1H), 6.31 (t, *J* = 7.2 Hz, 1H), 5.88 (s, 2H), 2.51 (q, *J* = 7.3 Hz, 2H), 1.49-1.43 (m, 2H), 1.38 (dd, *J* = 15.0, 7.2 Hz, 2H), 0.92 (t, *J* = 7.2 Hz, 3H).

**<sup>13</sup>C-NMR** (101 MHz; CDCl<sub>3</sub>): δ 147.5, 147.0, 139.1, 136.1, 134.9, 132.7, 128.6, 128.0, 125.3, 121.2, 107.9, 101.0, 36.6, 31.5, 30.7, 22.4, 14.0

**HRMS** *m/z* (ESI) calcd. for C<sub>19</sub>H<sub>21</sub>O<sub>2</sub>S<sup>+</sup> (M+K)<sup>+</sup> 351.0821, found 351.0826.

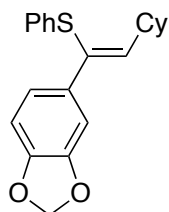

**3b**

### **(Z)-5-(2-cyclohexyl-1-(phenylthio)vinyl)benzo[d][1,3]dioxole**

**3b** was prepared following the General Procedure **1.3** and purified by flash Chromatography (Hexane: Ether= 100:1) as pale yellow oil.

**<sup>1</sup>H-NMR** (400 MHz; CDCl<sub>3</sub>): δ 7.14-7.13 (m, 4H), 7.07-7.02 (m, 3H), 6.65 (d, *J* = 8.6 Hz, 1H), 6.14 (d, *J* = 9.1 Hz, 1H), 5.88 (s, 2H), 2.86 (dt, *J* = 8.6, 3.1 Hz, 1H), 1.75-1.65 (m, 5H), 1.37-1.29 (m, 2H), 1.25-1.16 (m, *J* = 3.8 Hz, 3H).

**<sup>13</sup>C-NMR** (101 MHz; CDCl<sub>3</sub>): δ 147.4, 147.0, 144.7, 136.1, 134.7, 130.7, 128.6, 128.1, 125.3, 121.3, 107.92, 107.80, 101.0, 39.9, 32.8, 25.9, 25.7

**HRMS** *m/z* (ESI) calcd. for C<sub>21</sub>H<sub>23</sub>O<sub>2</sub>S<sup>+</sup> (M+H)<sup>+</sup> 339.1413, found 339.1423.

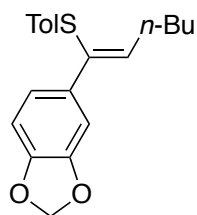

**3c**

**(Z)-5-(1-(*p*-tolylthio)hex-1-en-1-yl)benzo[*d*][1,3]dioxole**

**3c** was prepared following the General Procedure **1.3** and purified by flash Chromatography (Hexane: Ether= 100:1) as pale yellow oil.

**<sup>1</sup>H-NMR** (400 MHz; CDCl<sub>3</sub>): δ 7.05-7.02 (m, 4H), 6.95 (d, *J* = 8.0 Hz, 2H), 6.65 (d, *J* = 8.5 Hz, 1H), 6.26 (t, *J* = 7.2 Hz, 1H), 5.88 (s, 2H), 2.51 (q, *J* = 7.2 Hz, 2H), 2.22 (s, 3H), 1.51-1.43 (m, 2H), 1.41-1.34 (m, 2H), 0.92 (t, *J* = 7.2 Hz, 3H).

**<sup>13</sup>C-NMR** (101 MHz; CDCl<sub>3</sub>): δ 147.4, 146.9, 138.57, 138.55, 135.17, 135.07, 133.3, 132.3, 129.4, 128.4, 121.3, 107.97, 107.78, 101.0, 31.6, 30.7, 22.4, 20.9, 14.0

**HRMS** *m/z* (ESI) calcd. for C<sub>21</sub>H<sub>23</sub>O<sub>2</sub>S<sup>+</sup> (M+H)<sup>+</sup> 327.1413, found 327.1417.

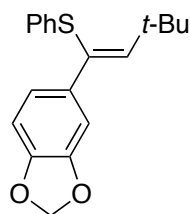

**3d**

**(Z)-5-(3,3-dimethyl-1-(phenylthio)but-1-en-1-yl)benzo[*d*][1,3]dioxole**

**3b** was prepared following the General Procedure **1.3** and purified by flash Chromatography (Hexane: Ether= 100:1) as white solid.

**<sup>1</sup>H-NMR** (400 MHz; CDCl<sub>3</sub>): δ 7.12-7.11 (m, 4H), 7.04-6.99 (m, 3H), 6.61 (d, *J* = 8.0 Hz, 1H), 6.28 (s, 1H), 5.85 (s, 2H), 1.35 (s, 9H).

**<sup>13</sup>C-NMR** (101 MHz; CDCl<sub>3</sub>): δ 148.6, 147.3, 146.9, 136.04, 135.85, 132.2, 128.66, 128.52, 125.4, 121.5, 108.3, 107.6, 100.9, 33.9, 30.6

**HRMS** *m/z* (ESI) calcd. for C<sub>19</sub>H<sub>21</sub>O<sub>2</sub>S<sup>+</sup> (M+H)<sup>+</sup> 313.1257, found 313.1267.

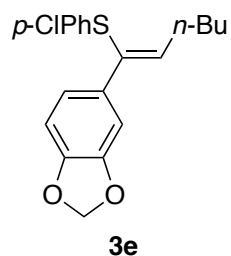

**(Z)-5-(1-((4-chlorophenyl)thio)hex-1-en-1-yl)benzo[d][1,3]dioxole**

**3e** was prepared following the to the General Procedure and purified by flash Chromatography (Hexane: Ether= 100:1) as colorless oil, which contained *E/Z* isomer (6:1) as unrepeatably mixture

**<sup>1</sup>H-NMR** (400 MHz; CDCl<sub>3</sub>): *Z* isomer δ 7.15-7.10 (m, 3H), 7.06-7.02 (m, 3H), 6.67 (d, *J* = 8.7 Hz, 1H), 6.30 (t, *J* = 7.3 Hz, 1H), 5.91 (s, 2H), 2.50 (q, *J* = 7.3 Hz, 2H), 1.48-1.44 (m, 2H), 1.40-1.36 (m, 2H), 0.92 (t, *J* = 7.2 Hz, 3H). *E* isomer: δ 7.15-7.09 (m, 3H), 7.06-7.02 (m, 3H), 6.69 (d, *J* = 1.8 Hz, 1H), 6.12 (t, *J* = 7.5 Hz, 1H), 5.92 (s, 2H), 2.16 (q, *J* = 7.4 Hz, 2H), 1.38-1.35 (m, 2H), 1.29-1.26 (m, 2H), 0.86 (t, *J* = 7.2 Hz, 1H).

**<sup>13</sup>C-NMR** (101 MHz; CDCl<sub>3</sub>): *Z* isomer was detected as major peak δ 147.6, 147.1, 139.3, 134.61, 134.47, 132.5, 131.2, 129.4, 128.8, 121.2, 107.89, 107.81, 101.1, 31.5, 30.7, 22.4, 14.0

**HRMS** *m/z* (ESI) calcd. for C<sub>19</sub>H<sub>20</sub>ClO<sub>2</sub>S<sup>+</sup> (M+H)<sup>+</sup> 347.0867, found 347.0933.

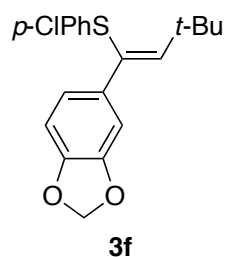

**(Z)-5-(1-((4-chlorophenyl)thio)-3,3-dimethylbut-1-en-1-yl)benzo[d][1,3]dioxole**

**3f** was prepared following the General Procedure **1.3** and purified by flash Chromatography (Hexane: Ether= 100:1) as pale white solid, which contained *E/Z* isomer (5:1) as unrepeatably mixture.

**<sup>1</sup>H-NMR** (500 MHz; CDCl<sub>3</sub>): *Z* isomer: δ 7.09-7.07 (m, 2H), 7.04-7.01 (m, 2H), 6.98-6.95 (m, 2H), 6.66-6.55 (m, 1H), 6.28 (s, 1H), 5.91 (s, 1H), 5.89 (s, 2H), 1.32 (s, 9H). *E* isomer: **<sup>1</sup>H-NMR** (500 MHz; CDCl<sub>3</sub>): δ 7.21-7.16 (m, 4H), 6.98-6.95 (m, 2H), 6.66-6.55 (m, 1H), 6.11 (s, 1H), 5.91 (s, 2H), 0.94 (s, 9H).

$^{13}\text{C-NMR}$  (101 MHz;  $\text{CDCl}_3$ ): Z isomer was detected as major peak  $\delta$  149.0, 147.4, 147.0, 135.6, 134.4, 133.1, 131.8, 131.3, 129.9, 128.7, 121.5, 108.2, 107.7, 101.0, 33.9, 30.9, 30.6

**HRMS**  $m/z$  (ESI) calcd. for  $\text{C}_{19}\text{H}_{20}\text{ClO}_2\text{S}^+$  ( $\text{M}+\text{K}$ ) $^+$  385.0431, found 385.0435.

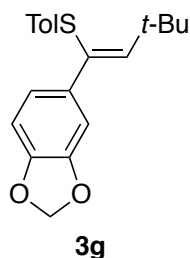

**3g** was prepared following the General Procedure **1.3** and purified by flash Chromatography (Hexane: Ether= 100:1) as colorless oil.

$^1\text{H-NMR}$  (400 MHz;  $\text{CDCl}_3$ ):  $\delta$  6.99-6.89 (m, 6H), 6.58 (d,  $J = 8.2$  Hz, 1H), 6.20 (s, 1H), 5.84 (s, 2H), 2.18 (s, 3H), 1.30 (d,  $J = 12.1$  Hz, 9H).

$^{13}\text{C-NMR}$  (101 MHz;  $\text{CDCl}_3$ ):  $\delta$  149.0, 147.4, 147.0, 135.6, 134.4, 133.1, 131.8, 131.3, 129.9, 128.7, 121.5, 108.2, 107.7, 101.0, 33.9, 30.9, 30.6

**HRMS**  $m/z$  (ESI) calcd. for  $\text{C}_{19}\text{H}_{20}\text{ClO}_2\text{S}^+$  ( $\text{M}+\text{K}$ ) $^+$  365.0977, found 365.0973.

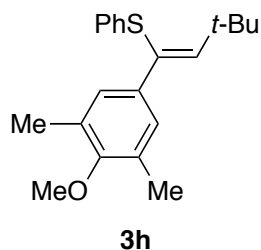

**(Z)-1-(4-methoxy-3,5-dimethylphenyl)-3,3-dimethylbut-1-en-1-yl(phenyl)sulfane**

**3g** was prepared following the General Procedure **1.3** and purified by flash Chromatography (Hexane: Ether= 100:1) as colorless oil.

$^1\text{H-NMR}$  (400 MHz;  $\text{CDCl}_3$ ):  $\delta$  7.14-7.11 (m, 6H), 7.02-6.99 (m, 1H), 6.30 (s, 1H), 3.63 (s, 3H), 2.18 (s, 6H), 1.33 (s, 9H)

$^{13}\text{C-NMR}$  (101 MHz;  $\text{CDCl}_3$ ):  $\delta$  156.4, 149.1, 137.0, 136.2, 131.9, 130.1, 128.46, 128.42, 128.1, 125.2, 59.6, 34.0, 30.6, 16.1

**HRMS**  $m/z$  (ESI) calcd. for  $\text{C}_{21}\text{H}_{27}\text{OS}^+$  ( $\text{M}+\text{H}$ ) $^+$  327.1777, found 327.1770.

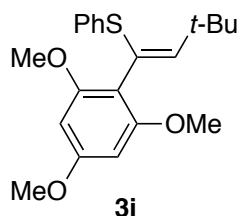

**(Z)-(3,3-dimethyl-1-(2,4,6-trimethoxyphenyl)but-1-en-1-yl)(phenyl)sulfane**

**3i** was prepared following the General Procedure **1.3** and purified by flash Chromatography (Hexane: Ether= 100:1) as colorless oil.

**<sup>1</sup>H-NMR** (500 MHz; CDCl<sub>3</sub>): δ 7.40-7.39 (m, 2H), 7.17-7.12 (m, 3H), 6.05 (s, 1H), 5.97 (s, 2H), 3.75 (s, 3H), 3.66 (s, 6H), 0.88 (s, 9H).

**<sup>13</sup>C-NMR** (101 MHz; CDCl<sub>3</sub>): δ 160.8, 157.9, 144.8, 135.4, 133.0, 127.9, 126.7, 124.9, 109.6, 90.0, 55.27, 55.15, 34.8, 29.5

**HRMS** *m/z* (ESI) calcd. for C<sub>21</sub>H<sub>27</sub>O<sub>3</sub>S<sup>+</sup> (M+H)<sup>+</sup> 359.1675, found 359.1683.

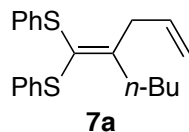

**(2-allylhex-1-ene-1,1-diyl)bis(phenylsulfane)**

**7a** was prepared following the General Procedure **1.4** and purified by flash Chromatography (Hexane) as colorless oil.

**<sup>1</sup>H-NMR** (400 MHz; CDCl<sub>3</sub>): δ 7.24-7.10 (m, 10H), 5.83 (ddt, *J* = 16.9, 10.1, 6.7 Hz, 1H), 5.16-5.08 (m, 2H), 3.38 (d, *J* = 6.6 Hz, 2H), 2.60 (t, *J* = 7.9 Hz, 2H), 1.56-1.48 (m, 2H), 1.38 (dq, *J* = 14.7, 7.3 Hz, 2H), 0.94 (t, *J* = 7.3 Hz, 3H).

**<sup>13</sup>C-NMR** (101 MHz; CDCl<sub>3</sub>): δ 157.5, 135.64, 135.64, 135.0, 129.6, 129.4, 128.57, 128.55, 126.20, 126.13, 123.2, 116.6, 40.0, 35.1, 31.0, 22.8, 13.9

**HRMS** *m/z* (ESI) calcd. for C<sub>21</sub>H<sub>25</sub>S<sub>2</sub><sup>+</sup> (M+H)<sup>+</sup> 341.1392, found 341.1367.

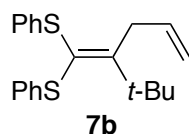

**(2-(tert-butyl)penta-1,4-diene-1,1-diyl)bis(phenylsulfane)**

**7b** was prepared following the General Procedure **1.4** and purified by flash Chromatography (Hexane) as colorless oil.

**<sup>1</sup>H-NMR** (400 MHz; CDCl<sub>3</sub>): δ 7.32-7.16 (m, 7H), 7.13-7.07 (m, 3H), 5.99-5.89 (m, 1H), 5.18-5.12 (m, 2H), 3.59 (dt, *J* = 5.6, 1.8 Hz, 2H), 1.49 (s, 9H).

**<sup>13</sup>C-NMR** (101 MHz; CDCl<sub>3</sub>): δ 162.4, 136.6, 136.4, 135.8, 129.7, 129.3, 128.49, 128.47, 126.11, 125.97, 125.1, 115.9, 39.8, 38.6, 30.8

**HRMS** *m/z* (ESI) calcd. for C<sub>21</sub>H<sub>25</sub>S<sub>2</sub><sup>+</sup> (M+H)<sup>+</sup> 341.1392, found 341.1399.

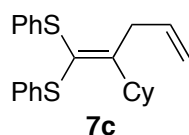

**(2-cyclohexylpenta-1,4-diene-1,1-diyl)bis(phenylsulfane)**

**7c** was prepared following the General Procedure **1.4** and purified by flash Chromatography (Hexane) as colorless oil.

**<sup>1</sup>H-NMR** (500 MHz; CDCl<sub>3</sub>): δ 7.25-7.20 (m, 4H), 7.18-7.15 (m, 2H), 7.13-7.12 (m, 2H), 7.09-7.08 (m, 2H), 5.85 (ddt, *J* = 16.9, 10.4, 6.3 Hz, 1H), 5.14-5.07 (m, 2H), 3.40-3.34 (m, 3H), 1.78-1.76 (m, 2H), 1.70-1.64 (m, 3H), 1.45 (qd, *J* = 12.4, 3.0 Hz, 2H), 1.33 (qt, *J* = 12.8, 3.1 Hz, 2H), 1.19 (tt, *J* = 12.8, 3.3 Hz, 1H).

**<sup>13</sup>C-NMR** (101 MHz; CDCl<sub>3</sub>): δ 160.8, 136.3, 135.9, 135.6, 129.60, 129.53, 128.57, 128.54, 126.2, 123.4, 116.2, 45.4, 36.5, 31.6, 26.3, 26.0

**HRMS** *m/z* (ESI) calcd. for C<sub>23</sub>H<sub>27</sub>S<sub>2</sub><sup>+</sup> (M+H)<sup>+</sup> 367.1549, found 367.1545.

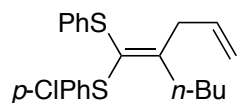

**(Z/E)-(2-allyl-1-((4-chlorophenyl)thio)hex-1-en-1-yl)(phenyl)sulfane**

**7d** was prepared following the General Procedure **1.4** and purified by flash Chromatography (Hexane) as colorless oil, which contained Z/E isomer (1:1) as an inseparable mixture.

**<sup>1</sup>H-NMR** (400 MHz; CDCl<sub>3</sub>): δ 7.24-7.16 (m, 5H), 7.12-7.08 (m, *J* = 1.2 Hz, 2H), 7.04-7.00 (m, 2H), 5.87-5.77 (m, 1H), 5.15-5.08 (m, 2H), 3.38-3.35 (m, 2H), 2.62-2.56 (m, 2H), 1.55-1.47 (m, 2H), 1.38 (dq, *J* = 14.7, 7.3 Hz, 2H), 0.94 (t, *J* = 7.3 Hz, 3H).



<sup>13</sup>C-NMR (101 MHz; CDCl<sub>3</sub>): δ 157.43, 157.38, 135.3, 134.90, 134.85, 134.1, 132.28, 132.21, 131.0, 130.8, 129.7, 129.5, 128.69, 128.68, 128.63, 128.61, 126.38, 126.32, 123.02, 122.96, 116.7, 40.03, 39.99, 35.19, 35.14, 31.0, 22.8, 13.9.

HRMS *m/z* (ESI) calcd. for C<sub>21</sub>H<sub>24</sub>ClS<sub>2</sub><sup>+</sup> (M+H)<sup>+</sup> 375.1002, found 374.0995.

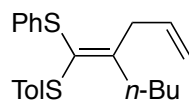

**7e** Z/E= 1:1

**(Z/E)-(2-allyl-1-(p-tolylthio)hex-1-en-1-yl)(phenyl)sulfane**

**7e** was prepared following the General Procedure **1.4** and purified by flash Chromatography (Hexane) as colorless oil, which contained Z/E isomer (1:1) as an inseparable mixture.

<sup>1</sup>H-NMR (400 MHz; CDCl<sub>3</sub>): δ 7.24-7.21 (m, 2H), 7.17-7.10 (m, 3H), 7.05-7.00 (m, 4H), 5.89-5.77 (m, 1H), 5.16-5.07 (m, 2H), 3.38 (dd, *J* = 13.4, 6.5 Hz, 2H), 2.63-2.57 (m, 2H), 2.30 (s, 3H), 1.55-1.49 (m, 2H), 1.42-1.34 (m, 2H), 0.94 (q, *J* = 7.4 Hz, 3H).

<sup>13</sup>C-NMR (101 MHz; CDCl<sub>3</sub>): δ 156.6, 136.41, 136.33, 135.9, 135.1, 131.9, 130.4, 130.1, 129.39, 129.38, 129.1, 128.6, 126.05, 125.99, 123.8, 116.5, 40.04, 39.95, 35.15, 35.06, 31.0, 22.9, 21.1, 14.0

HRMS *m/z* (ESI) calcd. for C<sub>22</sub>H<sub>27</sub>S<sub>2</sub><sup>+</sup> (M+H)<sup>+</sup> 355.1549, found 355.1540.

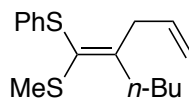

**7f** Z/E= 1:1

**(Z/E)-(2-allyl-1-(methylthio)hex-1-en-1-yl)(phenyl)sulfane**

**7f** was prepared following the General Procedure **1.4** and purified by flash Chromatography (Hexane) as colorless oil, which contained Z/E isomer (1:1) as an inseparable mixture.

<sup>1</sup>H-NMR (400 MHz; CDCl<sub>3</sub>): δ 7.29-7.21 (m, 8H), 7.18-7.14 (m, 2H), 5.87-5.80 (m, 1H), 5.78-5.69 (m, 1H), 5.15-5.00 (m, 4H), 3.31-3.26 (m, *J* = 1.4 Hz, 4H), 2.53-2.48 (m, 4H), 2.20 (s, 3H), 2.19 (s, 3H), 1.51-1.28 (m, 9H), 0.96 (t, *J* = 7.2 Hz, 3H), 0.89 (t, *J* = 7.2 Hz, 3H).

<sup>13</sup>C-NMR (101 MHz; CDCl<sub>3</sub>): δ 152.94, 152.83, 136.3, 135.4, 135.0, 128.76, 128.74, 127.8, 127.6, 125.68, 125.64, 124.53, 124.33, 116.19, 116.18, 40.2, 39.5, 35.4, 34.6, 30.9, 30.5, 22.87, 22.73, 17.10, 17.05, 13.98, 13.93

**HRMS**  $m/z$  (ESI) calcd. for  $C_{18}H_{25}S_2^+$  (M+H) $^+$  305.1392, found 305.1400.

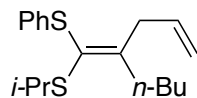

**7g** Z/E= 1:1

**(Z/E)-(2-allyl-1-(isopropylthio)hex-1-en-1-yl)(phenyl)sulfane**

**7g** was prepared following the General Procedure **1.4** and purified by flash Chromatography (Hexane) as colorless oil, which contained Z/E isomer (1:1) as an inseparable mixture.

**$^1H$ -NMR** (400 MHz;  $CDCl_3$ ):  $\delta$  7.29-7.21 (m, 8H), 7.20-7.14 (m, 2H), 5.86-5.72 (m, 2H), 5.13-5.02 (m, 4H), 3.37-3.28 (m, 7H), 2.53 (q,  $J = 7.7$  Hz, 5H), 1.47-1.31 (m, 8H), 1.18 (d,  $J = 4.5$  Hz, 6H), 1.16 (d,  $J = 4.4$  Hz, 6H), 0.95 (t,  $J = 7.2$  Hz, 3H), 0.90 (t,  $J = 7.2$  Hz, 3H).

**$^{13}C$ -NMR** (101 MHz;  $CDCl_3$ ):  $\delta$  155.61, 155.56, 136.28, 136.26, 135.5, 135.3, 128.67, 128.65, 128.4, 128.2, 125.70, 125.64, 123.83, 123.70, 116.13, 116.03, 39.9, 39.7, 37.19, 37.14, 35.00, 34.85, 31.1, 30.9, 22.89, 22.76, 22.67, 14.03, 13.97

**HRMS**  $m/z$  (ESI) calcd. for  $C_{18}H_{25}S_2^+$  (M+H) $^+$  305.1392, found 305.1400.

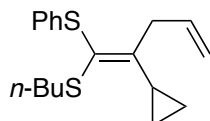

**7h** Z/E= 1:1

**(Z/E)-butyl(2-cyclopropyl-1-(phenylthio)penta-1,4-dien-1-yl)sulfane**

**7h** was prepared following the General Procedure **1.4** and purified by flash Chromatography (Hexane) as colorless oil, which contained Z/E isomer (1:1) as an inseparable mixture.

**$^1H$ -NMR** (400 MHz;  $CDCl_3$ ):  $\delta$  7.28-7.21 (m, 4H), 7.17-7.13 (m, 1H), 5.83-5.72 (m, 1H), 5.10-4.97 (m, 2H), 2.90 (ddt,  $J = 9.6, 5.8, 1.8$  Hz, 2H), 2.71 (dd,  $J = 7.3$  Hz, 2H), 2.56-2.47 (m, 1H), 1.52-1.41 (m, 2H), 1.34 (ddt,  $J = 14.9, 10.0, 7.4$  Hz, 2H), 0.88-0.81 (m, 4H), 0.74-0.64 (m, 3H).

**$^{13}C$ -NMR** (101 MHz;  $CDCl_3$ ):  $\delta$  153.25, 153.21, 136.7, 136.3, 136.1, 135.6, 128.69, 128.65, 128.2, 127.7, 125.7, 125.5, 123.6, 123.2, 115.8, 115.6, 34.4, 34.0, 33.4, 33.1, 31.82, 31.72, 21.89, 21.79, 16.5, 16.3, 13.67, 13.63, 6.7, 6.5

**HRMS**  $m/z$  (ESI) calcd. for  $C_{18}H_{25}S_2^+$  (M+H) $^+$  305.1392, found 305.1400.

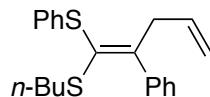

**7i**, Z/E= 2:1

**(Z/E)-butyl(2-phenyl-1-(phenylthio)penta-1,4-dien-1-yl)sulfane**

**7i** was prepared following the General Procedure **1.4** and purified by flash Chromatography (Hexane) as colorless oil

**<sup>1</sup>H-NMR** (500 MHz; CDCl<sub>3</sub>): Major Z isomer: δ 7.38-7.28 (m, 7H), 7.26-7.20 (m, 3H), 5.75-5.67 (m, 1H), 5.00-4.97 (m, 2H), 3.60 (d, *J* = 6.6 Hz, 2H), 2.56 (t, *J* = 7.4 Hz, 2H), 1.37 (quintet, *J* = 7.4 Hz, 2H), 1.20 (dt, *J* = 14.9, 7.4 Hz, 2H), 0.79 (t, *J* = 7.3 Hz, 3H).

**<sup>13</sup>C-NMR** (126 MHz; CDCl<sub>3</sub>): Major Z isomer: δ 151.0, 141.9, 135.7, 134.7, 128.9, 128.6, 128.4, 128.0, 127.2, 126.1, 116.5, 42.9, 33.2, 31.6, 21.7, 13.6

**HRMS** *m/z* (ESI) calcd. for C<sub>21</sub>H<sub>25</sub>S<sub>2</sub><sup>+</sup> (M+K)<sup>+</sup> 379.0956, found 370.0953.

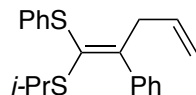

**7j**, Z/E= 1.5:1

**7j** was prepared following the General Procedure **1.4** and purified by flash Chromatography (Hexane) as colorless oil.

**(Z)-isopropyl(2-phenyl-1-(phenylthio)penta-1,4-dien-1-yl)sulfane**

**<sup>1</sup>H-NMR** (500 MHz; CDCl<sub>3</sub>): δ 7.39-7.28 (m, 7H), 7.23-7.20 (m, 3H), 5.75-5.69 (m, 1H), 5.01-4.97 (m, 2H), 3.61 (t, *J* = 7.6 Hz, 2H), 3.27 (dt, *J* = 13.5, 6.7 Hz, 1H), 1.07 (d, *J* = 6.8 Hz, 6H).

**<sup>13</sup>C-NMR** (126 MHz; CDCl<sub>3</sub>): δ 151.6, 141.9, 135.6, 134.7, 128.90, 128.80, 128.4, 127.9, 127.1, 126.1, 116.5, 42.8, 37.3, 22.7

**HRMS** *m/z* (ESI) calcd. for C<sub>20</sub>H<sub>23</sub>S<sub>2</sub><sup>+</sup> (M+H)<sup>+</sup> 327.1236, found 327.1235.

**(E)-isopropyl(2-phenyl-1-(phenylthio)penta-1,4-dien-1-yl)sulfane**

**<sup>1</sup>H-NMR** (500 MHz; CDCl<sub>3</sub>): δ 7.29-7.23 (m, 7H), 7.17 (dt, *J* = 8.2, 1.9 Hz, 3H), 5.78-5.71 (m, 1H), 5.06-5.01 (m, 2H), 3.62 (d, *J* = 6.6 Hz, 2H), 3.40 (dt, *J* = 13.5, 6.7 Hz, 1H), 1.24 (d, *J* = 6.7 Hz, 6H).

**<sup>13</sup>C-NMR** (126 MHz; CDCl<sub>3</sub>): δ 152.3, 142.3, 136.1, 134.4, 129.3, 128.5, 128.02, 127.86, 127.67, 127.1, 126.0, 116.5, 77.3, 77.0, 76.7, 42.6, 37.3, 22.9

**HRMS** *m/z* (ESI) calcd. for C<sub>20</sub>H<sub>23</sub>S<sub>2</sub><sup>+</sup> (M+H)<sup>+</sup> 327.1236, found 127.1230.

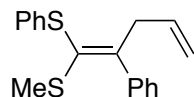

**7k**, Z/E= 1.5:1

**(Z/E)-methyl(2-phenyl-1-(phenylthio)penta-1,4-dien-1-yl)sulfane**

**7k** was prepared following the General Procedure **1.4** and purified by flash Chromatography (Hexane) as colorless oil, which contained Z/E isomer (1.5:1) as an inseparable mixture.

**<sup>1</sup>H-NMR** (500 MHz; CDCl<sub>3</sub>): δ 7.40-7.17 (m, 10H), 5.80-5.67 (m, 1H), 5.07-4.96 (m, 2H), 3.59 (d, *J* = 6.6 Hz, 2H), 2.25 (s, 1H), 2.09 (s, 2H).

**<sup>13</sup>C-NMR** (126 MHz; CDCl<sub>3</sub>): δ 149.7, 141.5, 135.78, 135.77, 134.6, 130.8, 128.9, 128.68, 128.58, 128.33, 128.25, 128.23, 128.22, 128.09, 128.03, 128.02, 128.01, 128.00, 127.94, 127.93, 127.86, 127.78, 127.4, 127.12, 127.11, 126.06, 125.89, 116.54, 116.53, 42.88, 42.87, 42.86, 42.4, 17.3, 16.8

**HRMS** *m/z* (ESI) calcd. for C<sub>18</sub>H<sub>19</sub>S<sub>2</sub><sup>+</sup> (M+H)<sup>+</sup> 299.0923, found 299.0917.

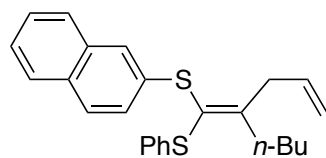

**7l**, Z/E= 1:1

**(Z/E)-(2-allyl-1-(naphthalen-2-ylthio)hex-1-en-1-yl)(phenyl)sulfane**

**7l** was prepared following the General Procedure **1.4** and purified by flash Chromatography (Hexane) as colorless oil, which contained Z/E isomer (1:1) as an inseparable mixture.

**<sup>1</sup>H-NMR** (400 MHz; CDCl<sub>3</sub>): δ 7.77-7.64 (m, 3H), 7.51 (d, *J* = 6.2 Hz, 1H), 7.45-7.40 (m, 2H), 7.26-7.16 (m, 4H), 7.12-7.09 (m, 2H), 5.92-5.82 (m, 1H), 5.20-5.10 (m, 2H), 3.42 (dd, *J* = 6.5, 1.3 Hz, 2H), 2.65 (t, *J* = 7.9 Hz, 2H), 1.59-1.52 (m, 2H), 1.41 (dt, *J* = 14.6, 7.3 Hz, 2H), 0.95 (q, *J* = 7.8 Hz, 3H).

**<sup>13</sup>C-NMR** (126 MHz; CDCl<sub>3</sub>): δ 157.63, 157.61, 135.62, 135.60, 135.09, 135.05, 133.56, 133.56, 133.07, 133.05, 131.93, 131.90, 129.7, 129.4, 128.59, 128.57, 128.11, 128.10, 128.06, 127.79, 127.67, 127.66, 127.53, 127.34, 127.25, 127.22, 126.29, 126.28, 126.27, 126.20, 125.66, 125.63, 123.12, 123.10, 116.69, 116.67, 40.1, 35.2, 31.1, 22.9, 13.99, 13.97

**HRMS** *m/z* (ESI) calcd. for C<sub>18</sub>H<sub>19</sub>S<sub>2</sub><sup>+</sup> (M+H)<sup>+</sup> 391.1549, found 391.1542.

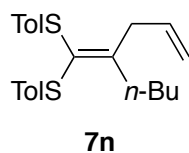

**(2-allylhex-1-ene-1,1-diyl)bis(*p*-tolylsulfane)**

**7n** was prepared following the General Procedure **1.4** and purified by flash Chromatography (Hexane) as colorless oil.

**<sup>1</sup>H-NMR** (400 MHz; CDCl<sub>3</sub>): δ 7.03 (q, *J* = 7.1 Hz, 8H), 5.86-5.79 (m, 1H), 5.10 (t, *J* = 13.9 Hz, 2H), 3.38 (d, *J* = 6.5 Hz, 2H), 2.59 (t, *J* = 7.9 Hz, 2H), 2.31 (s, 6H), 1.53-1.47 (m, 2H), 1.38 (q, *J* = 7.3 Hz, 2H), 0.94 (t, *J* = 7.2 Hz, 3H).

**<sup>13</sup>C-NMR** (126 MHz; CDCl<sub>3</sub>): δ 156.0, 136.25, 136.18, 135.3, 132.1, 130.1, 129.9, 129.39, 129.38, 124.4, 116.4, 40.0, 35.1, 31.0, 22.9, 21.1, 14.0

**HRMS** *m/z* (ESI) calcd. for C<sub>23</sub>H<sub>29</sub>S<sub>2</sub><sup>+</sup> (M+H)<sup>+</sup> 369.1705, found 369.1710.

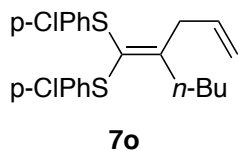

**(2-allylhex-1-ene-1,1-diyl)bis((4-chlorophenyl)sulfane)**

**7o** was prepared following the General Procedure **1.4** and purified by flash Chromatography (Hexane) as colorless oil, which contained trace inseparable Allyl 4-chlorophenyl sulfide starting material.

**<sup>1</sup>H-NMR** (500 MHz; CDCl<sub>3</sub>): δ 7.21-7.19 (m, 4H), 7.03-7.00 (m, 4H), 5.87-5.77 (m, *J* = 4.6 Hz, 1H), 5.15-5.06 (m, 2H), 3.36 (d, *J* = 6.6 Hz, 2H), 2.58 (t, *J* = 7.9 Hz, 2H), 1.49 (ddd, *J* = 5.6, 4.5, 4.4 Hz, 2H), 1.38 (q, *J* = 7.4 Hz, 2H), 0.94 (t, *J* = 7.3 Hz, 3H).

**<sup>13</sup>C-NMR** (126 MHz; CDCl<sub>3</sub>): δ 157.6, 134.7, 133.7, 132.48, 132.42, 131.10, 130.90, 128.8, 122.7, 116.9, 40.0, 35.2, 31.0, 22.8, 13.9

**HRMS** *m/z* (ESI) calcd. for C<sub>23</sub>H<sub>29</sub>S<sub>2</sub><sup>+</sup> (M+H)<sup>+</sup> 409.0613, found 409.0610.

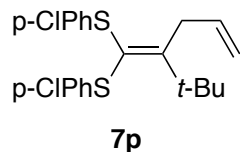

**(2-(*tert*-butyl)penta-1,4-diene-1,1-diyl)bis((4-chlorophenyl)sulfane)**

**7p** was prepared following the General Procedure **1.4** and purified by flash Chromatography (Hexane) as white solid.

**<sup>1</sup>H-NMR** (500 MHz; CDCl<sub>3</sub>): δ 7.26-7.18 (m, 5H), 6.98 (dd, *J* = 21.6, 8.5 Hz, 4H), 5.89 (td, *J* = 11.1, 5.9 Hz, 1H), 5.15-5.08 (m, 2H), 3.54 (d, *J* = 5.7 Hz, 2H), 1.44 (s, 10H).

**<sup>13</sup>C-NMR** (126 MHz; CDCl<sub>3</sub>): δ 162.8, 136.3, 134.5, 133.9, 132.4, 132.2, 131.3, 130.6, 128.75, 128.71, 124.5, 116.1, 39.8, 38.6, 30.7

**HRMS** *m/z* (ESI) calcd. for C<sub>23</sub>H<sub>29</sub>S<sub>2</sub><sup>+</sup> (M+K)<sup>+</sup> 409.0618, found 409.0617.

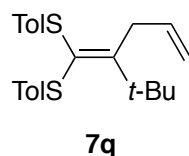

**(2-(*tert*-butyl)penta-1,4-diene-1,1-diyl)bis(*p*-tolylsulfane)**

**7q** was prepared following the General Procedure **1.4** and purified by flash Chromatography (Hexane) as white solid.

**<sup>1</sup>H-NMR** (500 MHz; CDCl<sub>3</sub>): δ 7.04 (dt, *J* = 24.0, 8.1 Hz, 6H), 6.95 (d, *J* = 8.1 Hz, 2H), 5.91 (ddd, *J* = 12.0, 9.7, 5.8 Hz, 1H), 5.13-5.09 (m, 2H), 3.57 (dd, *J* = 4.0, 1.7 Hz, 2H), 2.32 (d, *J* = 4.9 Hz, 6H), 1.45 (s, 9H).

**<sup>13</sup>C-NMR** (126 MHz; CDCl<sub>3</sub>): δ 161.2, 136.8, 136.2, 135.9, 133.0, 132.3, 130.2, 129.48, 129.33, 129.31, 126.2, 115.7, 39.7, 38.5, 30.8, 21.12, 21.11

**HRMS** *m/z* (ESI) calcd. for C<sub>23</sub>H<sub>29</sub>S<sub>2</sub><sup>+</sup> (M+H)<sup>+</sup> 369.1705, found 369.1710.

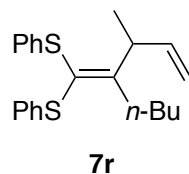

**(2-(but-3-en-2-yl)hex-1-ene-1,1-diyl)bis(phenylsulfane)**

**7r** was prepared following the General Procedure **1.4** and purified by flash Chromatography (Hexane) as colorless oil, which contained trace inseparable **4a** byproduct.

**<sup>1</sup>H-NMR** (500 MHz; CDCl<sub>3</sub>): δ 7.26-7.22 (m, 5H), 7.19-7.16 (m, 2H), 7.12-7.10 (m, 3H), 5.94-5.87 (m, 1H), 5.11-5.07 (m, 2H), 4.28 (quintet, *J* = 6.6 Hz, 1H), 2.44 (dd, *J* = 9.0, 6.2 Hz, 2H), 1.58-1.51 (m, 2H), 1.43-1.35 (m, 2H), 1.24 (d, *J* = 7.0 Hz, 3H), 0.93 (t, *J* = 7.2 Hz, 3H).

**<sup>13</sup>C-NMR** (126 MHz; CDCl<sub>3</sub>): δ 162.6, 140.6, 136.0, 135.7, 131.2, 130.2, 129.7, 128.9, 128.63, 128.59, 126.2, 126.0, 114.5, 43.3, 33.1, 32.2, 23.3, 18.1, 13.8

**HRMS** *m/z* (ESI) calcd. for C<sub>23</sub>H<sub>29</sub>S<sub>2</sub><sup>+</sup> (M+H)<sup>+</sup> 355.1549, found 355.1540.

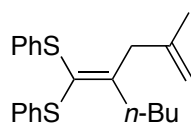

**7s**

#### **(2-(2-methylallyl)hex-1-ene-1,1-diyl)bis(phenylsulfane)**

**7s** was prepared following the General Procedure **1.4** and purified by flash Chromatography (Hexane) as colorless oil.

**<sup>1</sup>H-NMR** (500 MHz; CDCl<sub>3</sub>): δ 7.26-7.22 (m, 5H), 7.19-7.16 (m, 2H), 7.14-7.09 (m, 3H), 4.87 (s, 1H), 4.76 (s, 1H), 3.37 (s, 2H), 2.60-2.57 (m, 2H), 1.78 (s, 3H), 1.55-1.50 (m, 2H), 1.39 (dd, *J* = 14.8, 7.4 Hz, 2H), 0.94 (t, *J* = 7.3 Hz, 3H).

**<sup>13</sup>C-NMR** (126 MHz; CDCl<sub>3</sub>): δ 157.2, 143.1, 135.70, 135.69, 129.9, 129.5, 128.6, 126.27, 126.17, 124.1, 112.1, 43.5, 34.9, 31.3, 22.92, 22.80, 14.0

**HRMS** *m/z* (ESI) calcd. for C<sub>23</sub>H<sub>29</sub>S<sub>2</sub><sup>+</sup> (M+H)<sup>+</sup> 355.1549, found 355.1544.

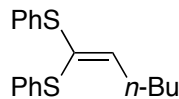

**4a**

#### **Hex-1-ene-1,1-diylbis(phenylsulfane)**

**4a** was separated as byproduct following the General Procedure **1.3** and purified by flash Chromatography (Hexane) as colorless oil.

**<sup>1</sup>H-NMR** (400 MHz; CDCl<sub>3</sub>): δ 7.27-7.19 (m, 10H), 6.39 (t, *J* = 7.4 Hz, 1H), 2.44 (q, *J* = 7.3 Hz, 2H), 1.45-1.33 (m, 5H), 0.91 (t, *J* = 7.2 Hz, 3H).

$^{13}\text{C-NMR}$  (101 MHz;  $\text{CDCl}_3$ ):  $\delta$  145.0, 134.47, 134.43, 131.2, 130.2, 128.78, 128.64, 128.51, 127.2, 126.6, 31.20, 31.03, 22.4, 13.9

**HRMS**  $m/z$  (ESI) calcd. for  $\text{C}_{18}\text{H}_{21}\text{S}_2^+$  ( $\text{M}+\text{H}$ ) $^+$  301.1085, found 355.1088.

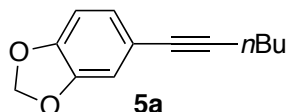

### 5-(hex-1-yn-1-yl)benzo[d][1,3]dioxole

**5a** was separated as byproduct following the General Procedure **1.3** and purified by flash Chromatography (Hexane) as colorless oil.

$^1\text{H-NMR}$  (400 MHz;  $\text{CDCl}_3$ ):  $\delta$  7.56 (dd,  $J = 8.2, 1.6$  Hz, 1H), 7.44 (d,  $J = 1.6$  Hz, 1H), 6.84 (d,  $J = 8.2$  Hz, 1H), 6.03 (s, 2H), 2.87 (t,  $J = 7.5$  Hz, 2H), 1.73-1.70 (m, 2H), 1.35 (dt,  $J = 6.7, 3.6$  Hz, 4H), 0.91 (dd,  $J = 8.9, 4.7$  Hz, 3H).

$^{13}\text{C-NMR}$  (101 MHz;  $\text{CDCl}_3$ ):  $\delta$  198.6, 151.5, 148.1, 132.0, 124.2, 107.89, 107.77, 101.7, 38.3, 31.5, 24.3, 22.5, 13.9.

**HRMS**  $m/z$  (ESI) calcd. for  $\text{C}_{13}\text{H}_{15}\text{O}_2^+$  ( $\text{M}+\text{H}$ ) $^+$  203.1067, found 203.1001.

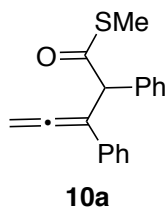

### S-methyl 2,3-diphenylpenta-3,4-dienethioate

**10a** was separated following the General Procedure **1.5** and purified by flash Chromatography (Hexane) as colorless oil.

$^1\text{H-NMR}$  (400 MHz;  $\text{CDCl}_3$ ):  $\delta$  7.40-7.23 (m, 10H), 7.19-7.16 (m, 1H), 5.22-5.10 (m, 2H), 5.02 (t,  $J = 2.5$  Hz, 1H), 2.28 (s, 3H).

$^{13}\text{C-NMR}$  (101 MHz;  $\text{CDCl}_3$ ):  $\delta$  209.8, 198.2, 136.5, 135.1, 129.10, 129.10, 128.47, 128.46, 128.44, 127.8, 127.0, 126.22, 126.22, 104.6, 80.7, 60.5, 12.1

**HRMS**  $m/z$  (ESI) calcd. for  $\text{C}_{18}\text{H}_{17}\text{OS}^+$  ( $\text{M}+\text{H}$ ) $^+$  281.0995, found 280.0862.



## **VI. NMR Spectra Data**

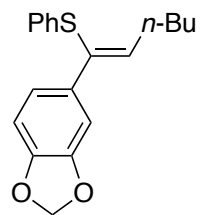

**3a**

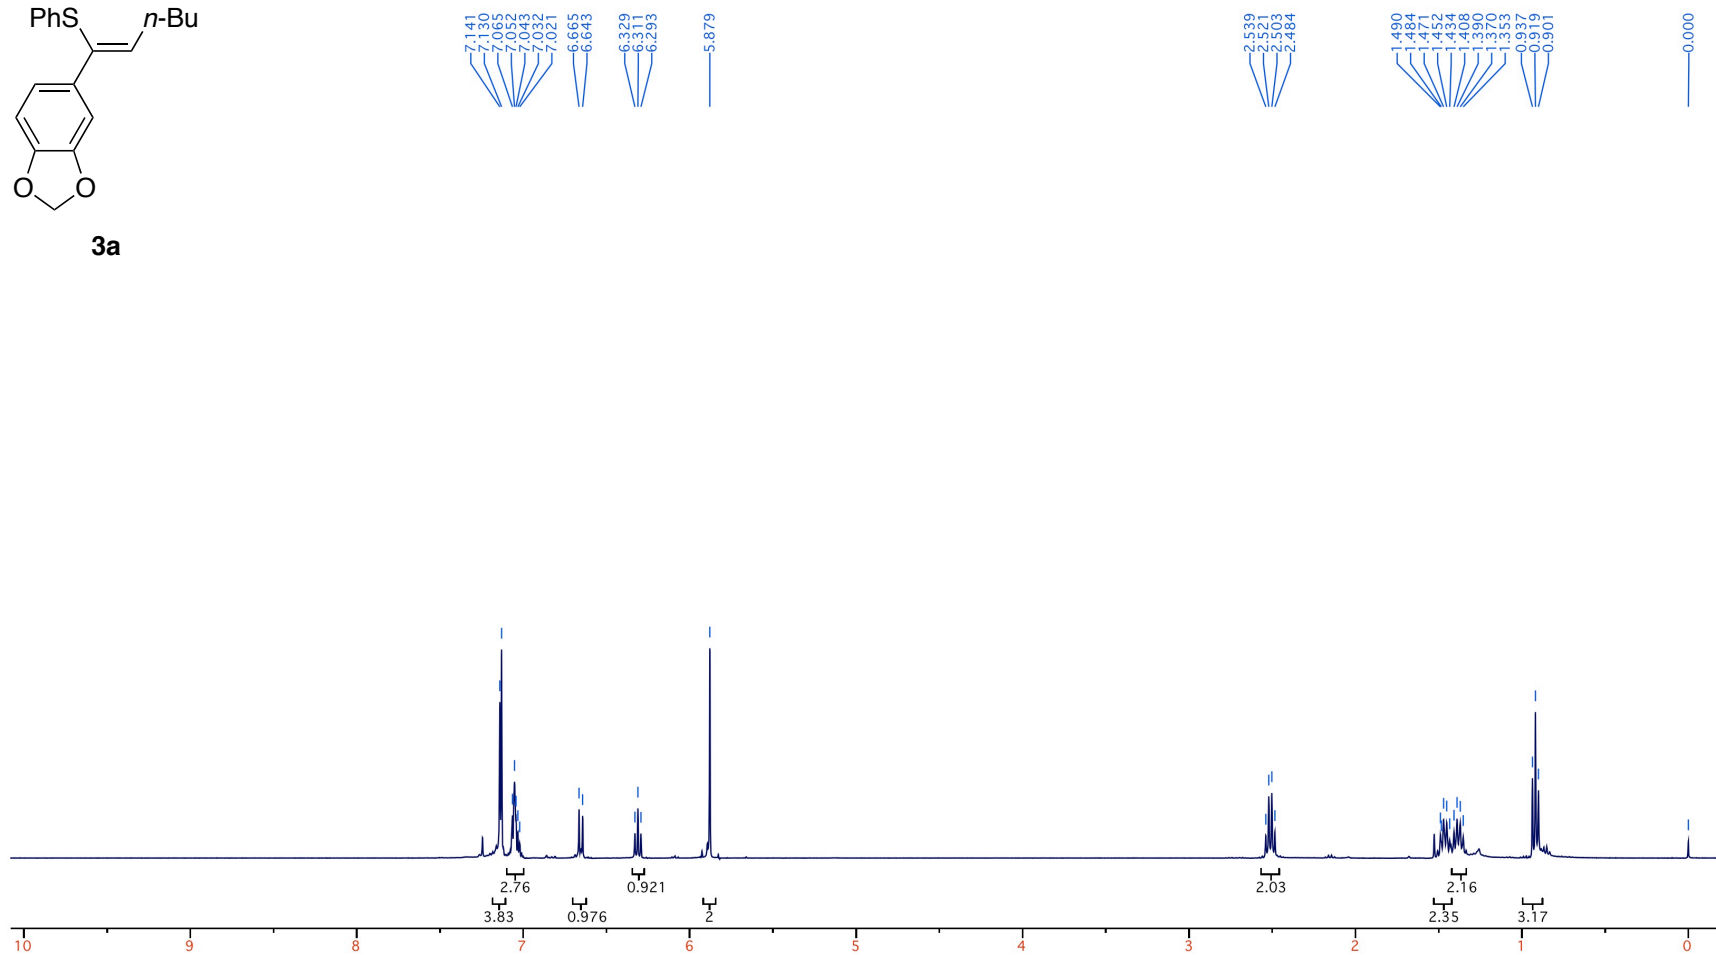

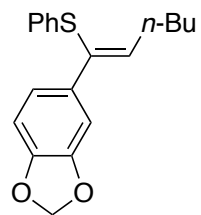

**3a**

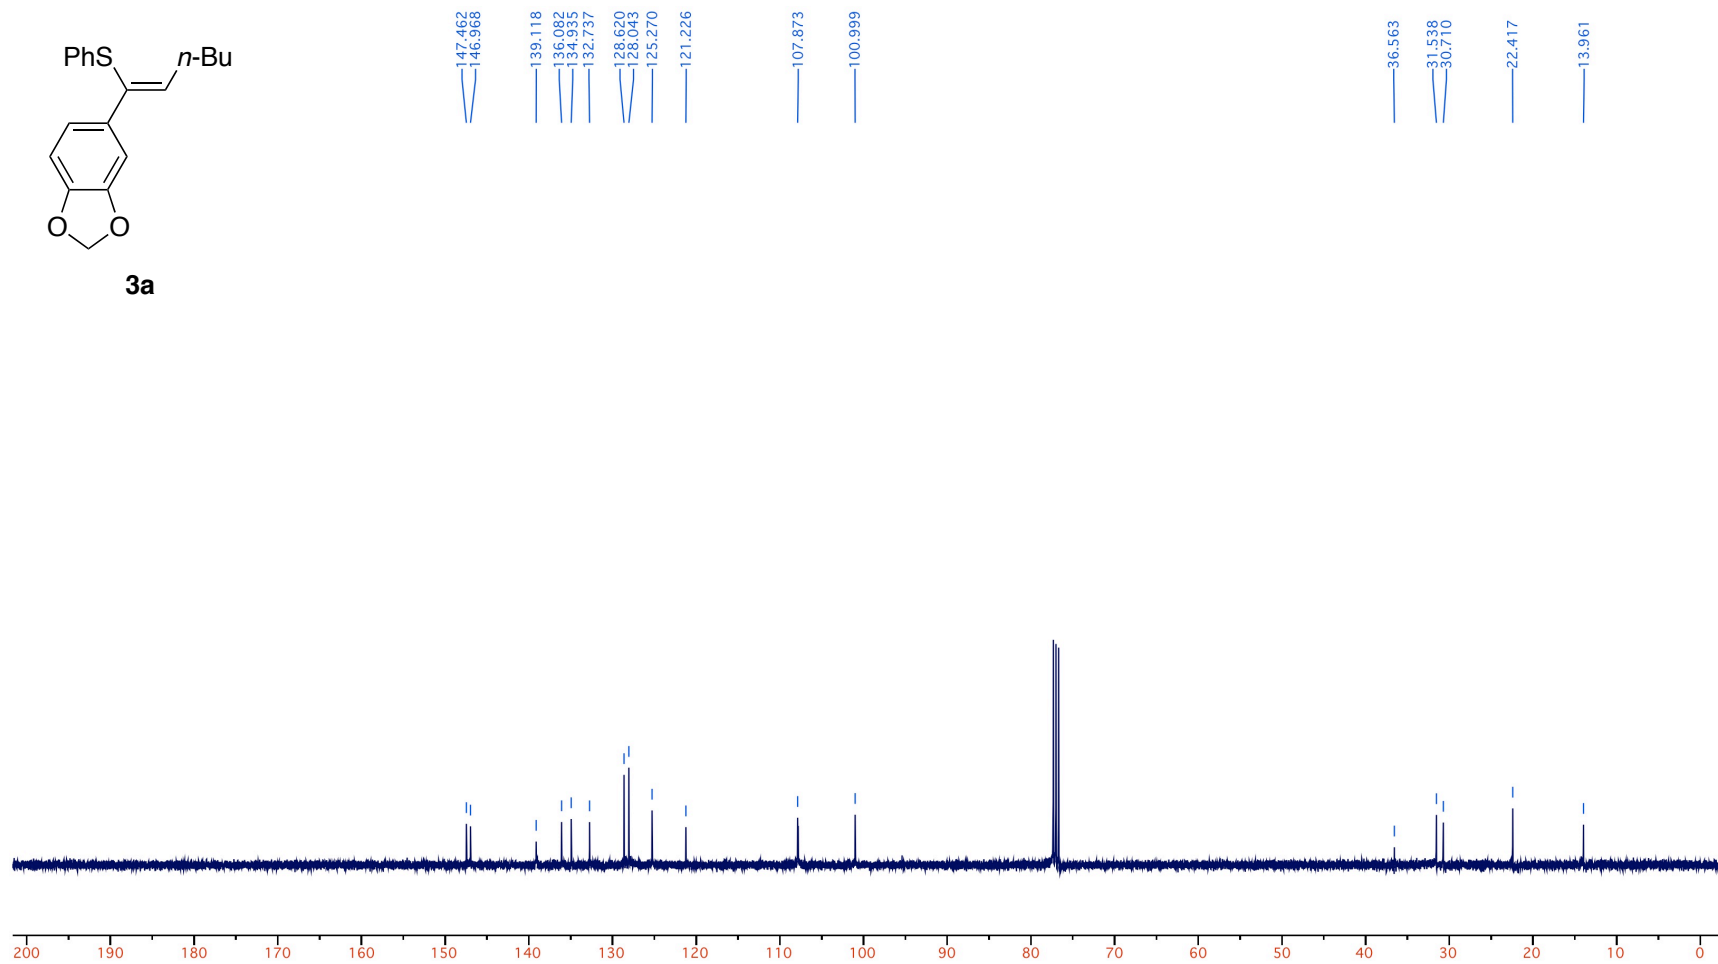

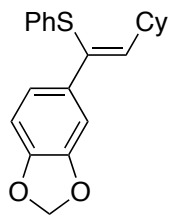

**3b**

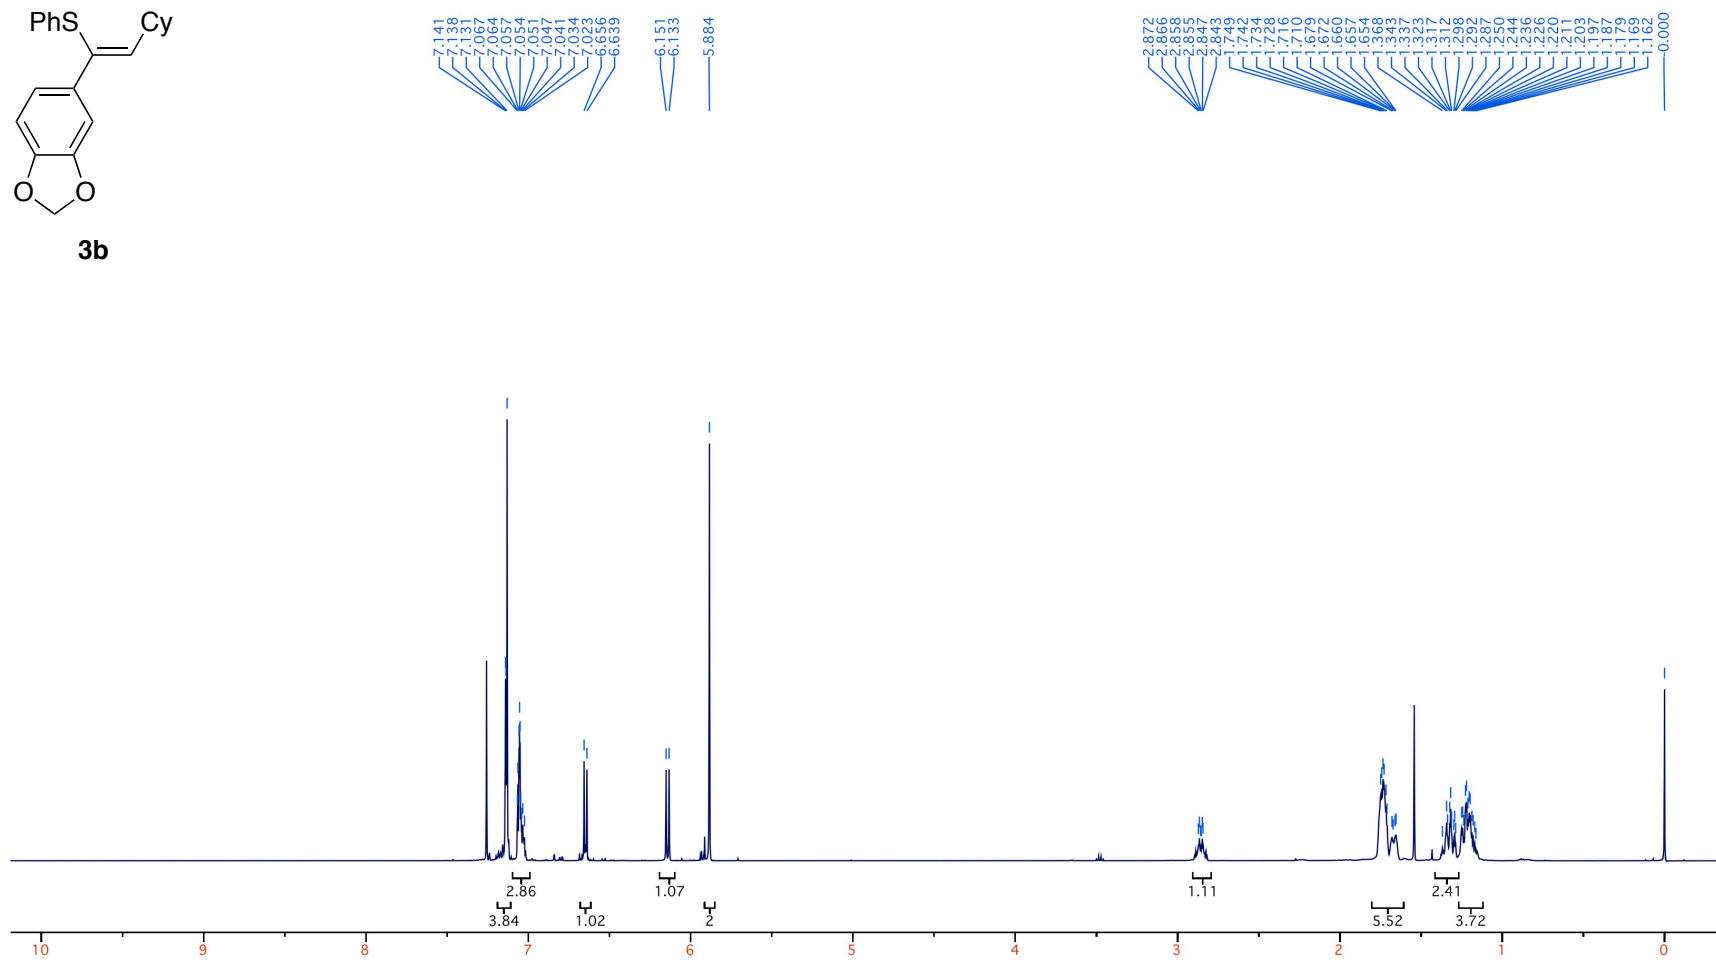

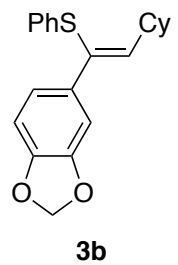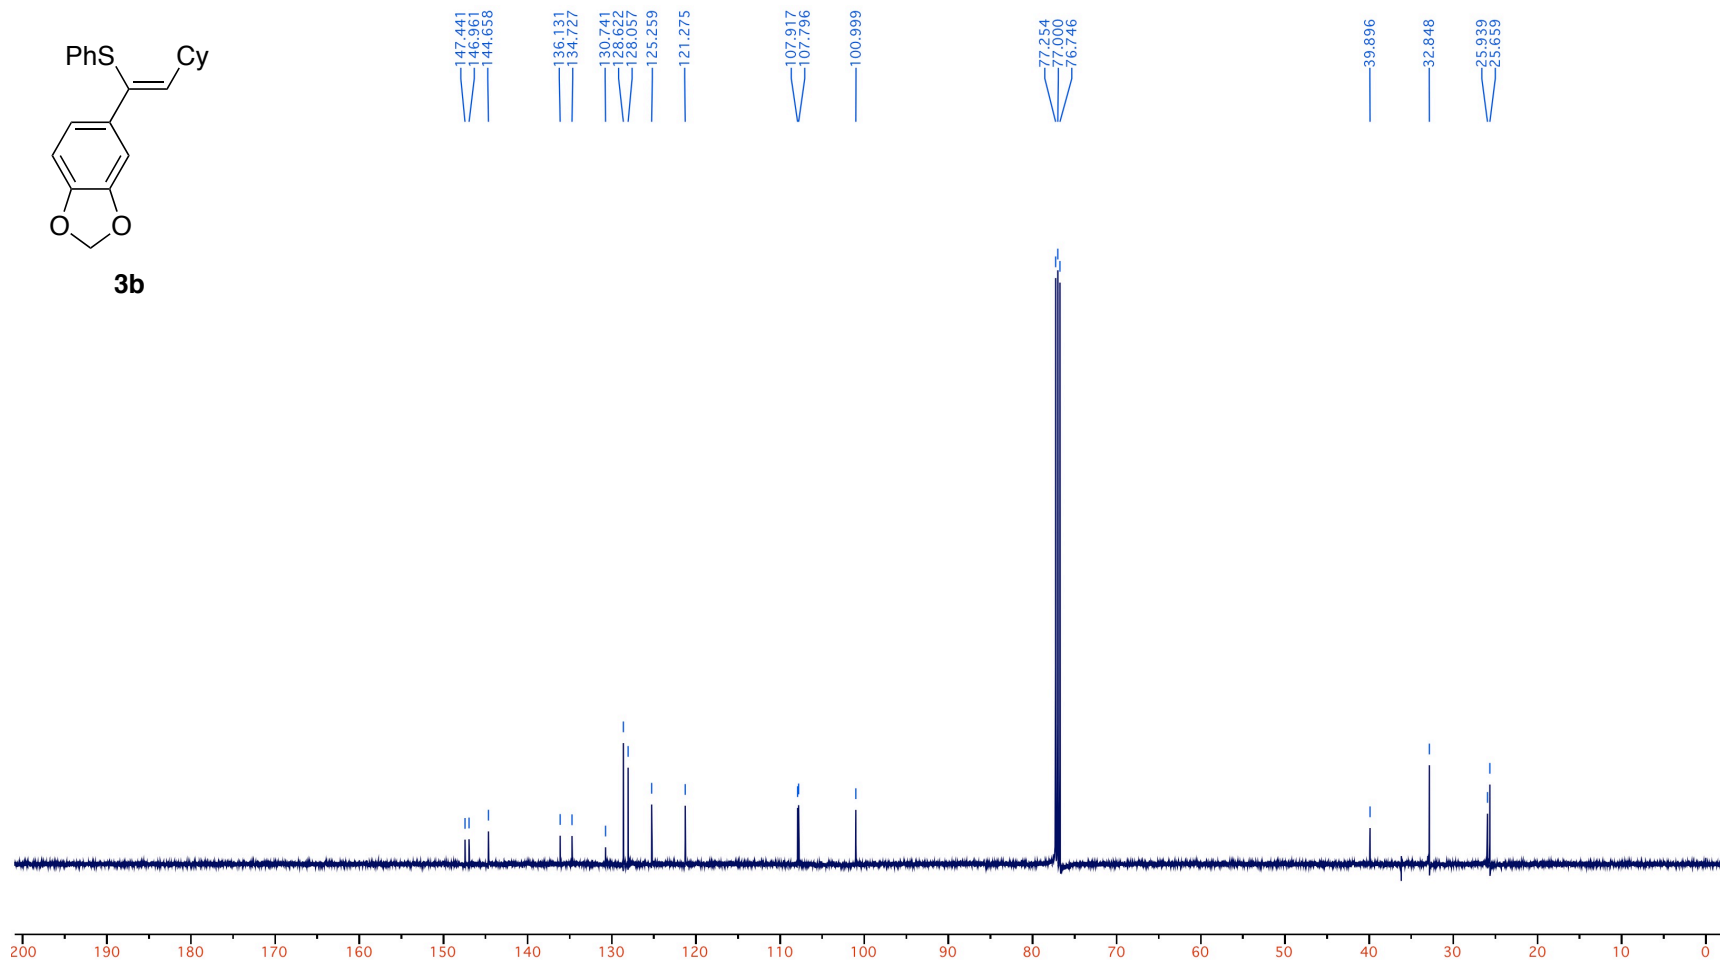

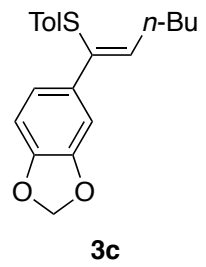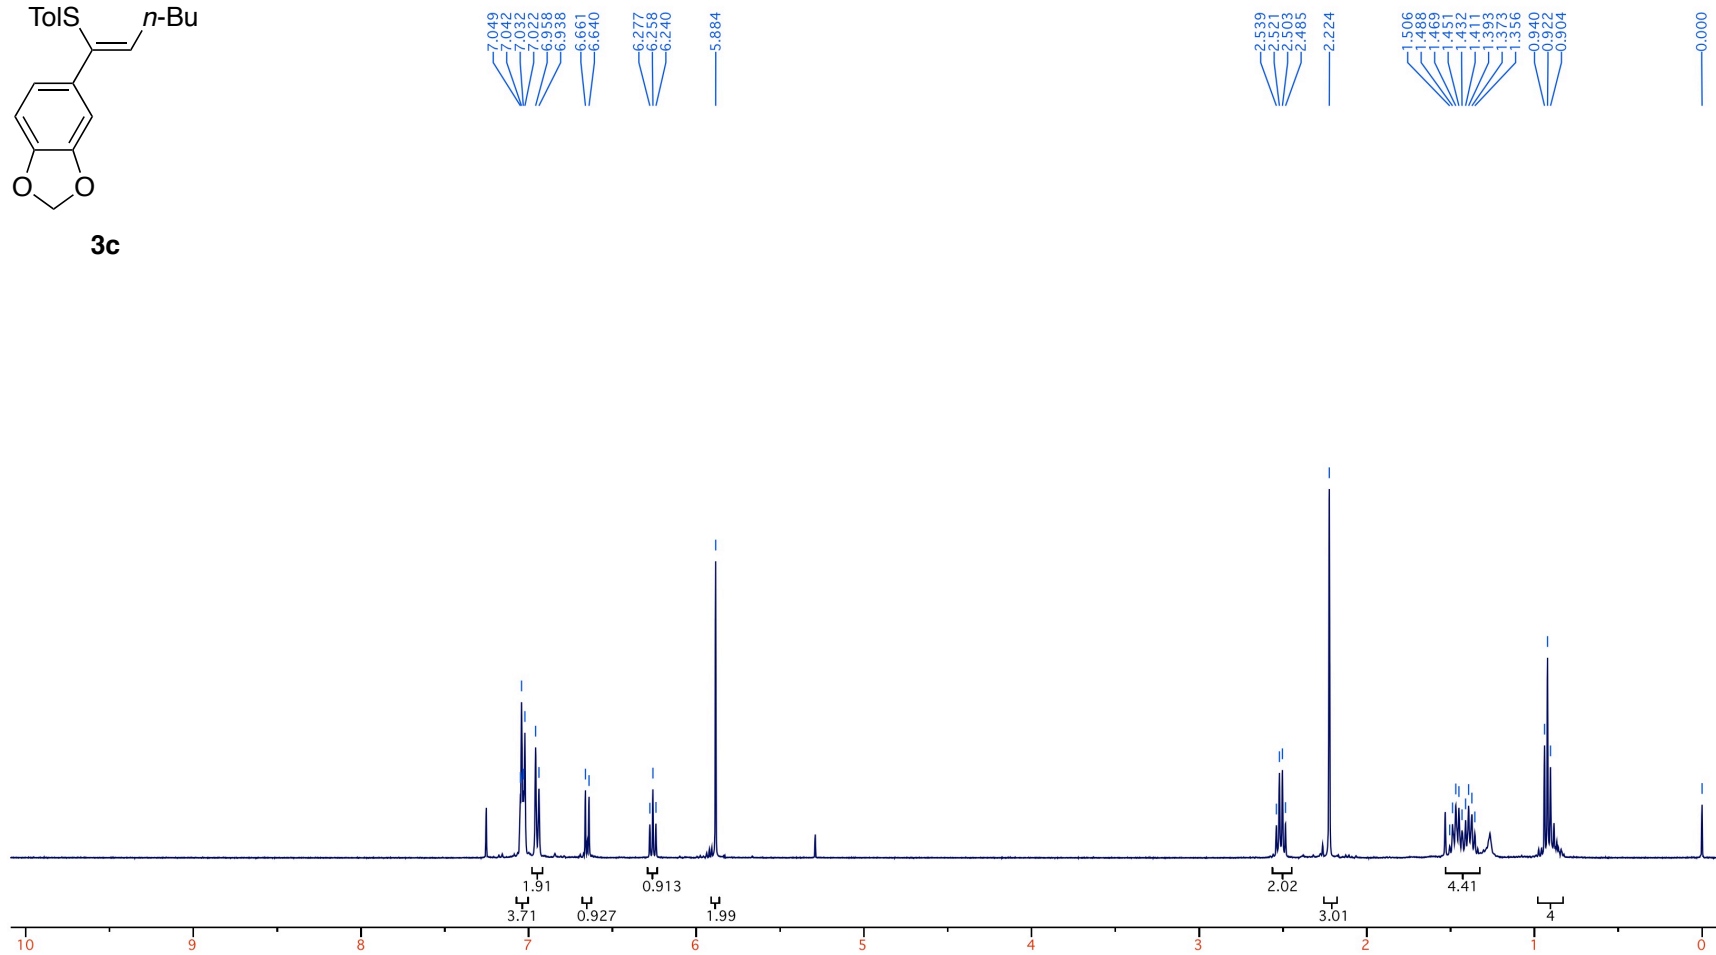

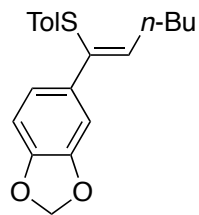

**3c**

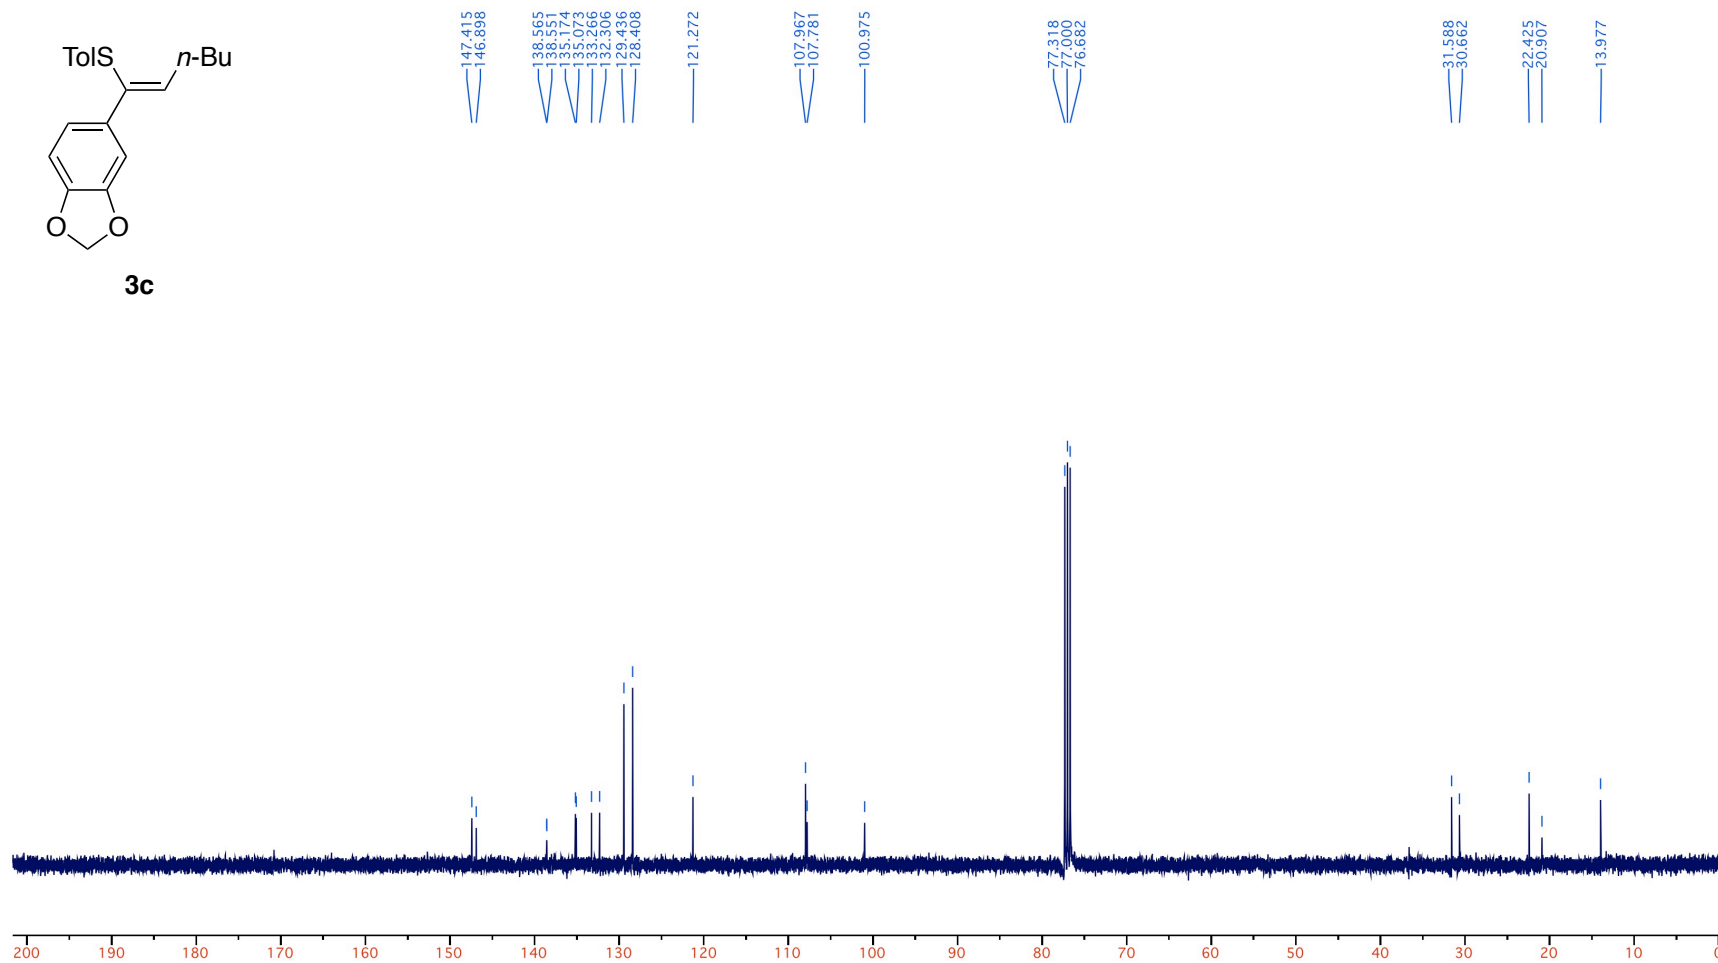

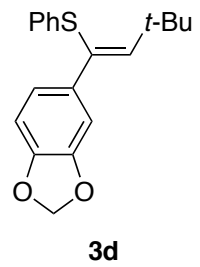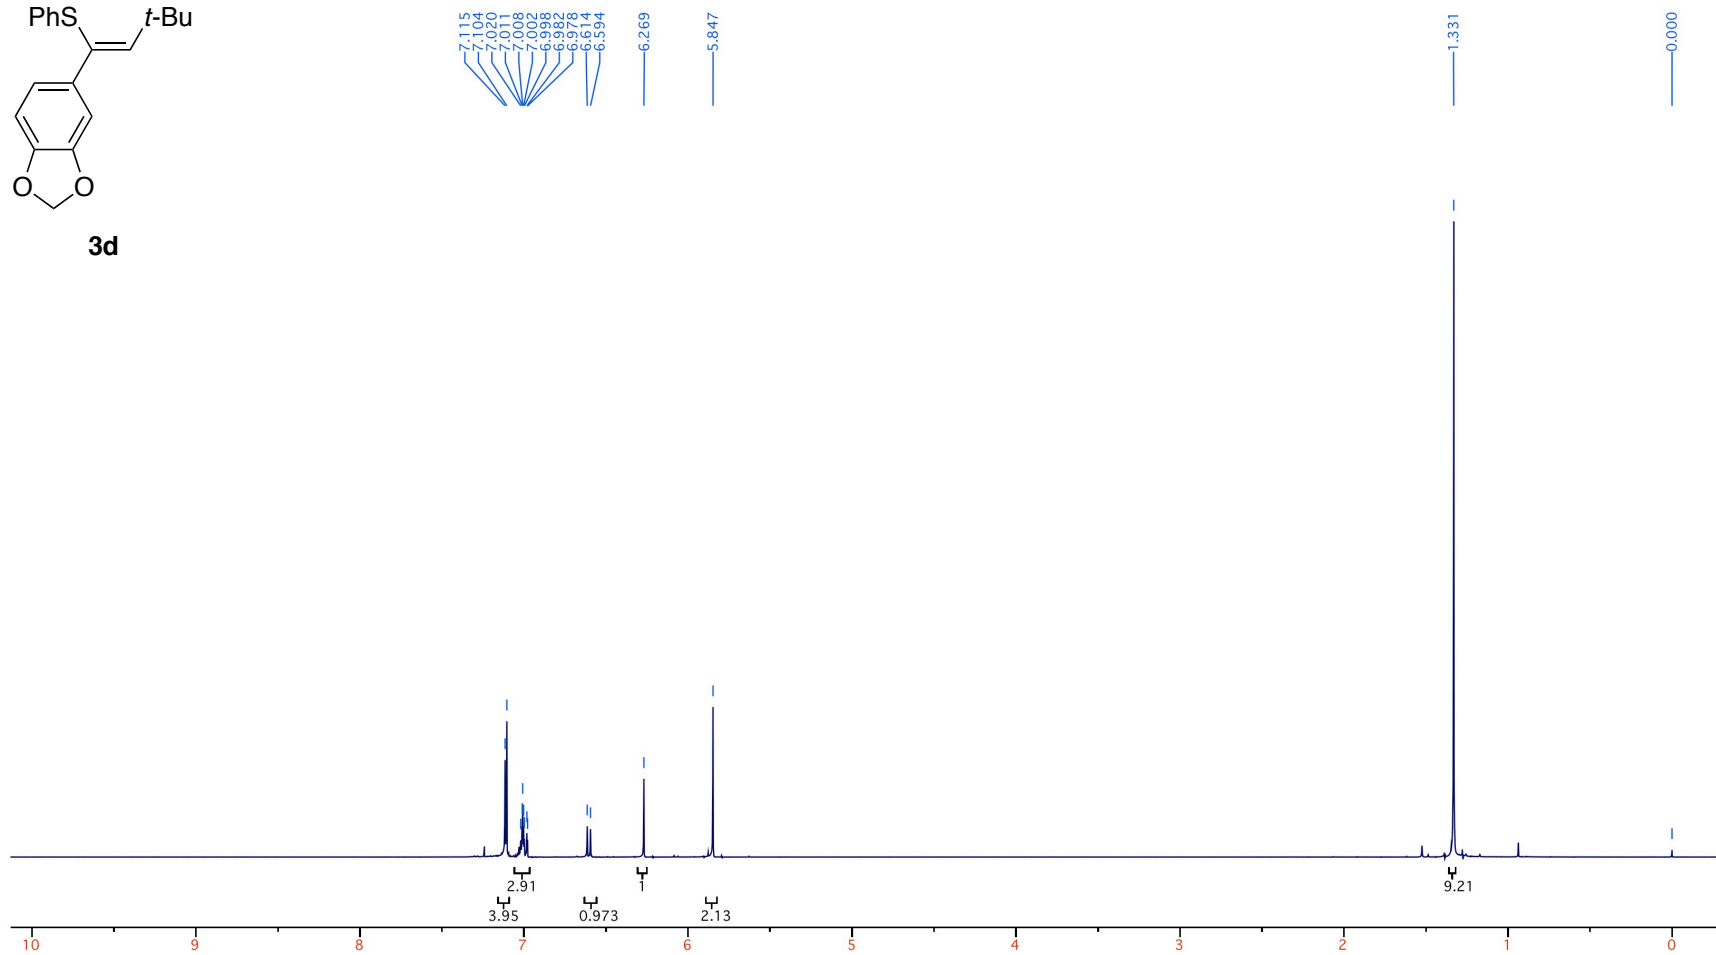



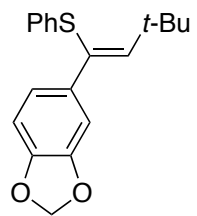

3d

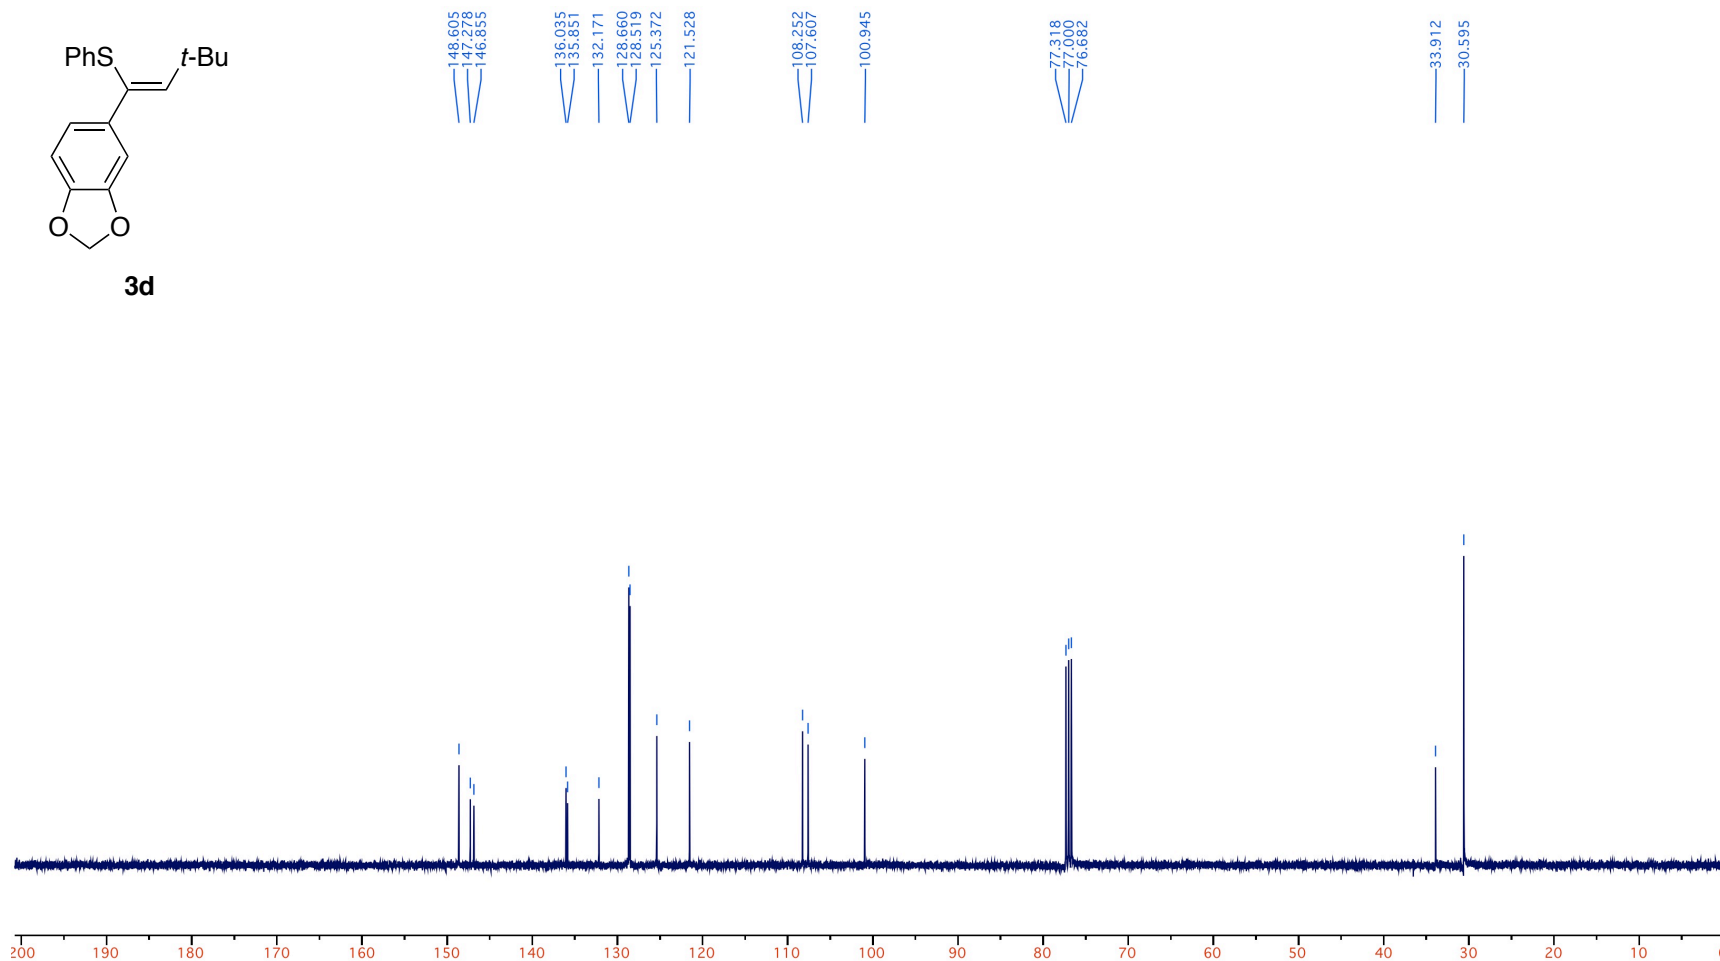

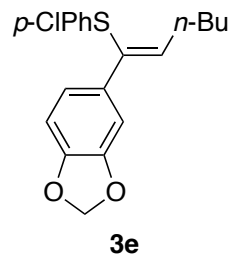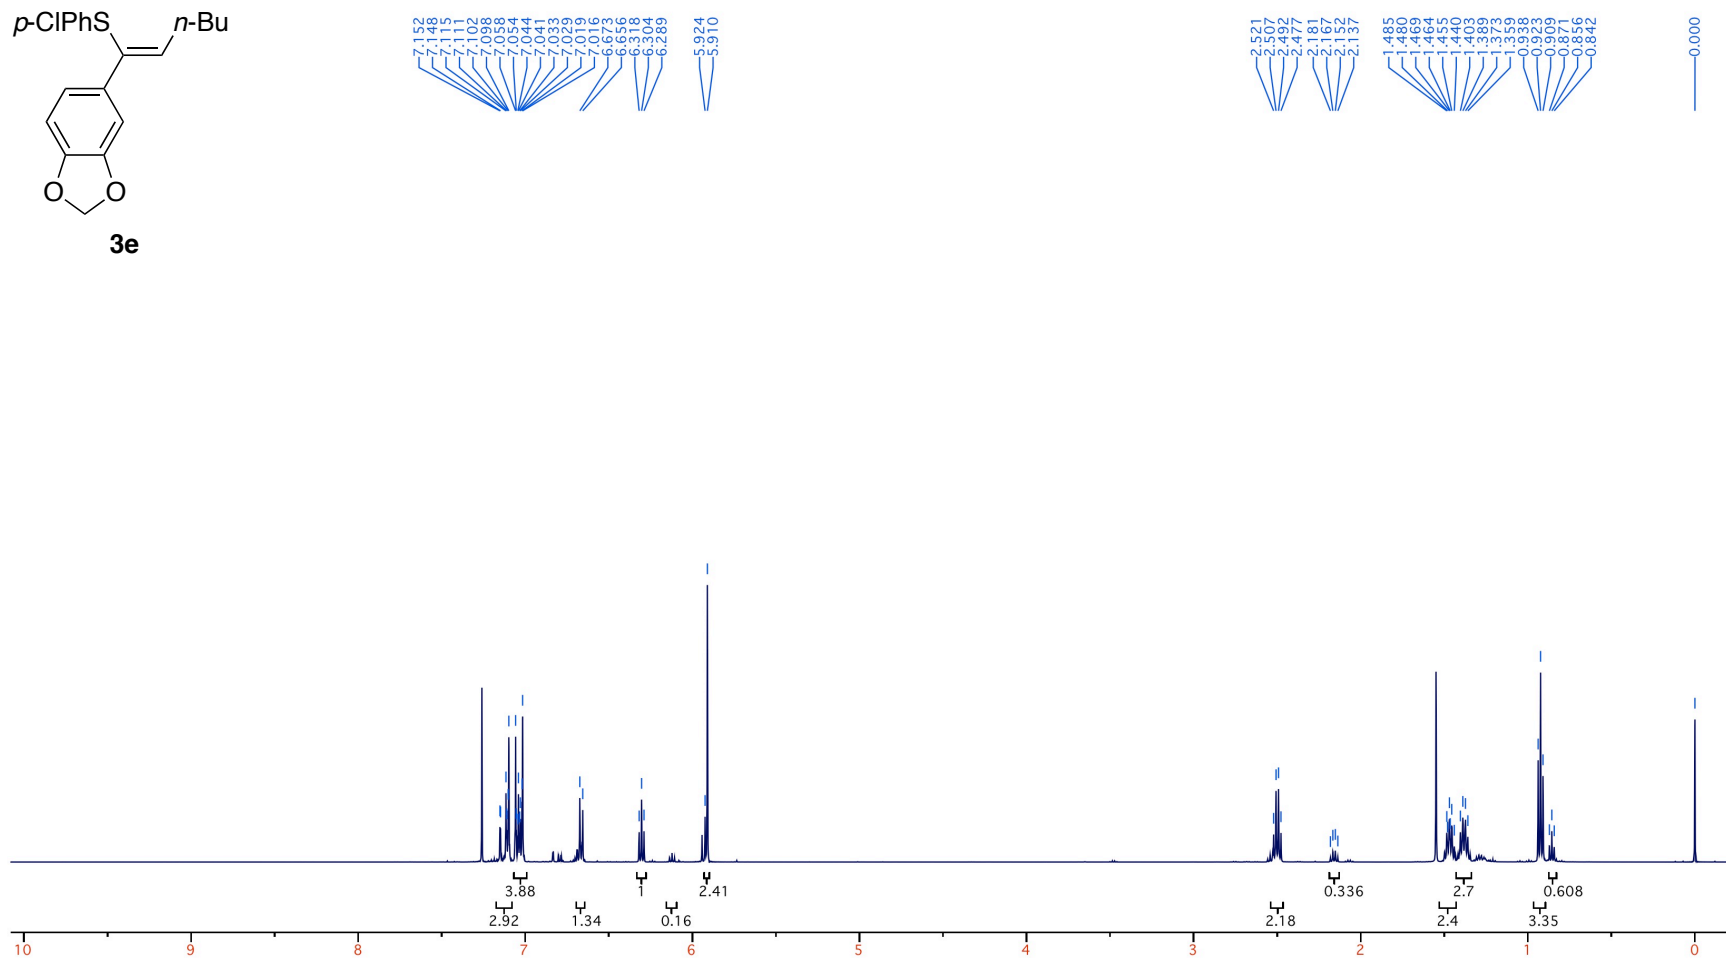

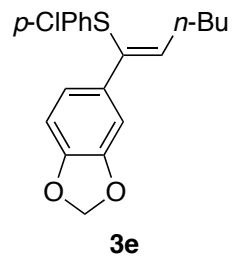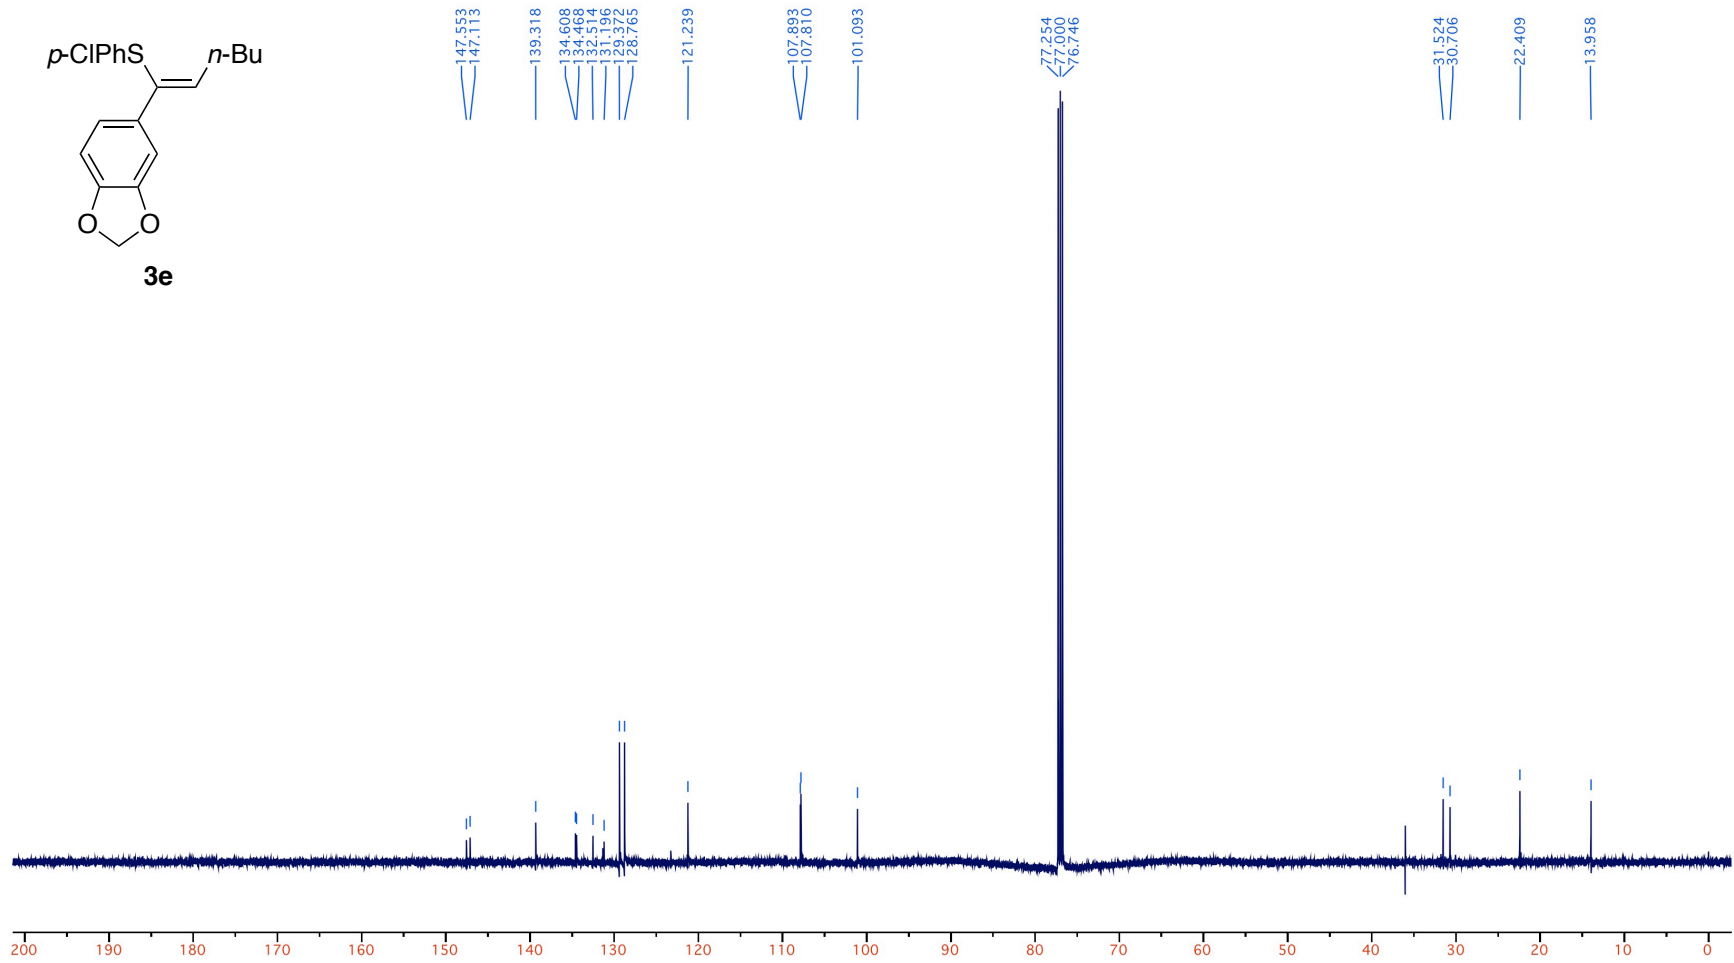

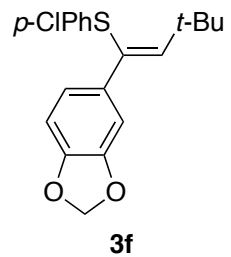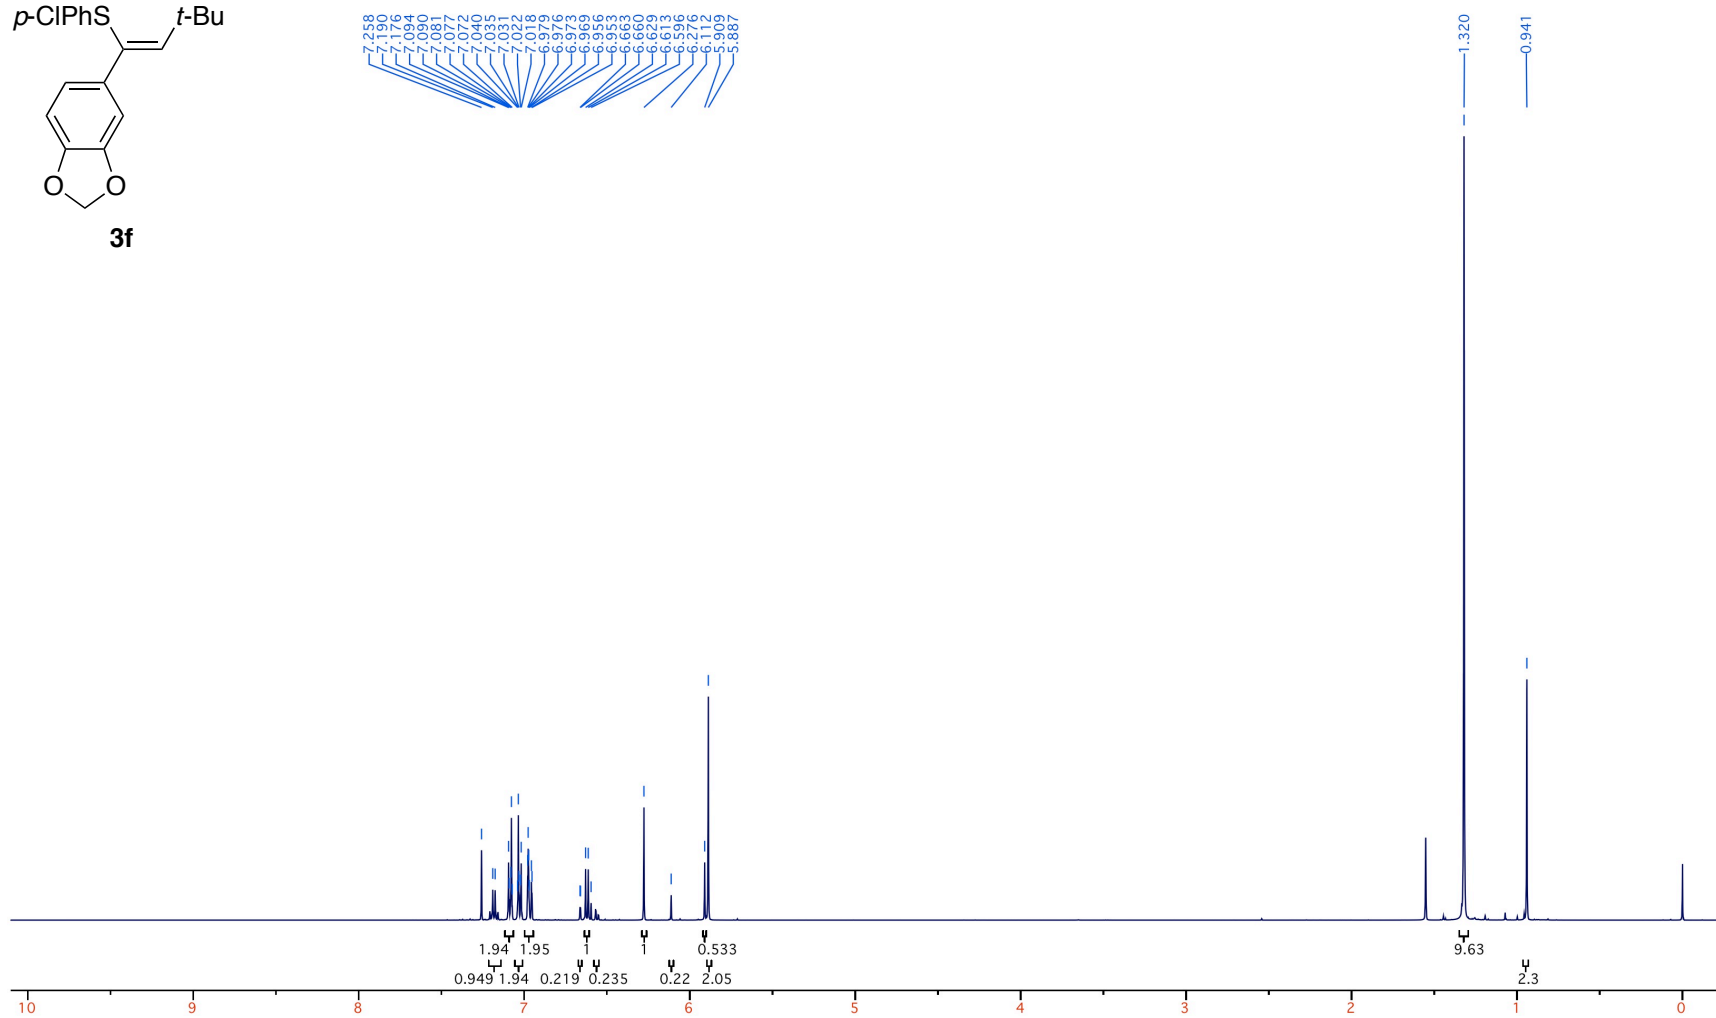

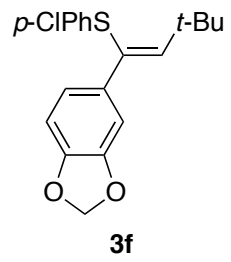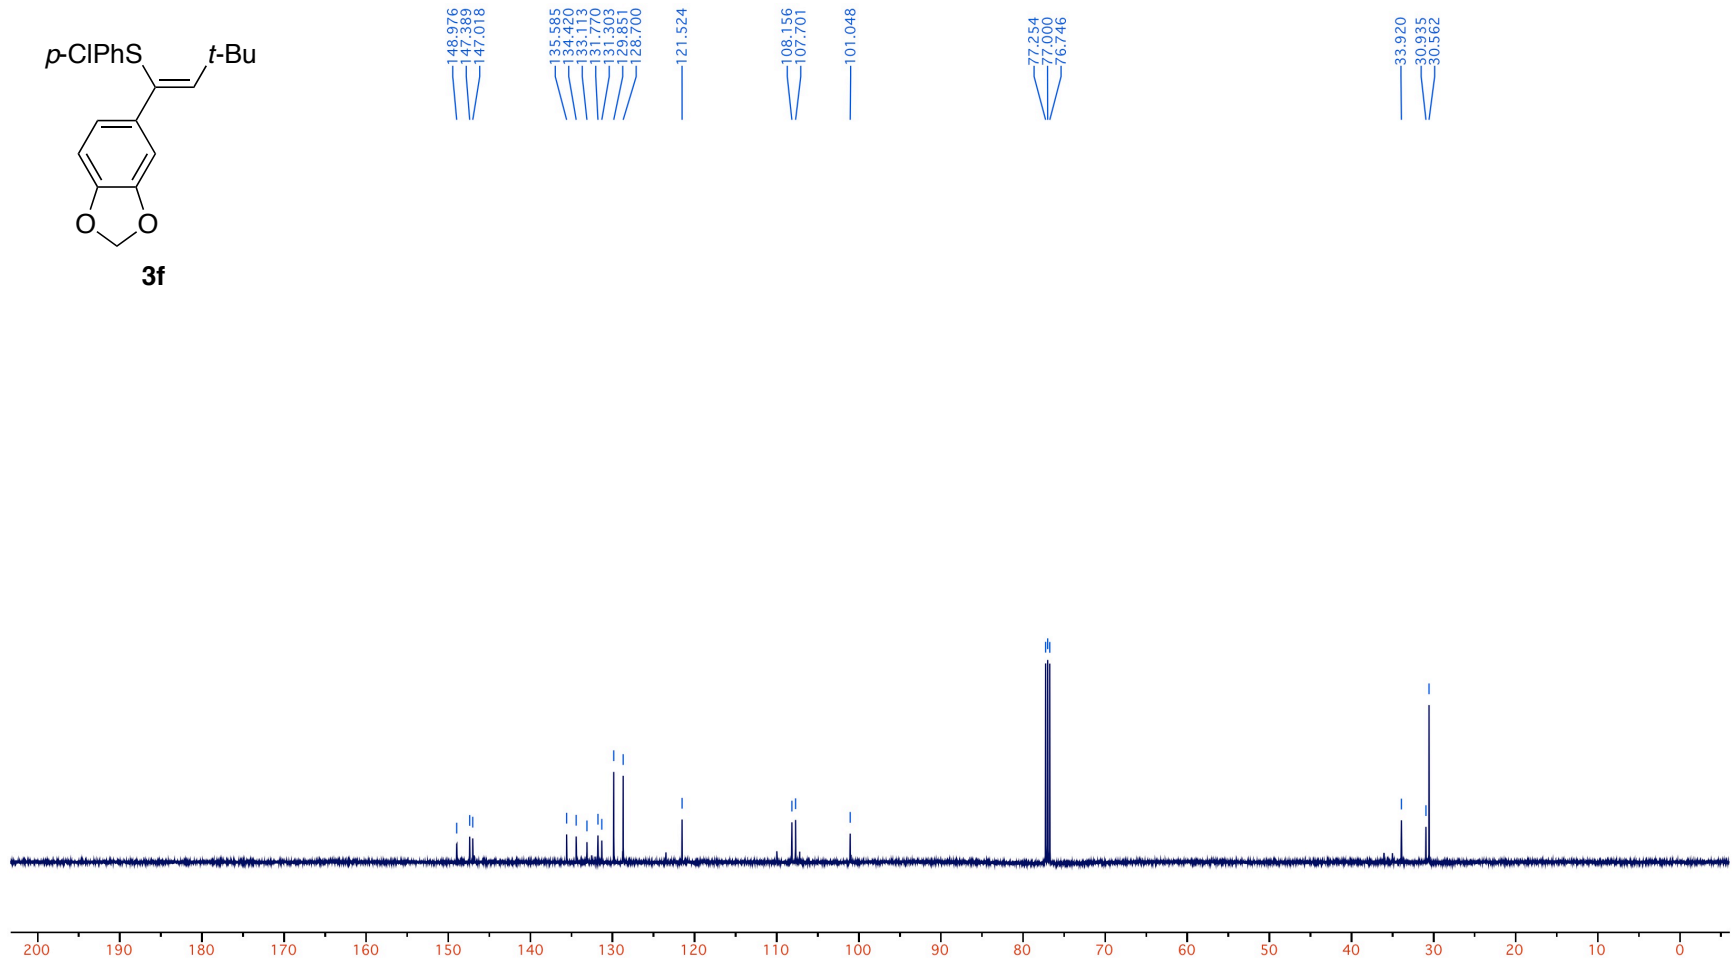

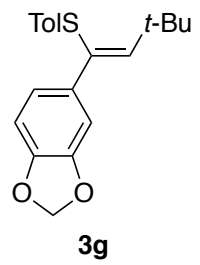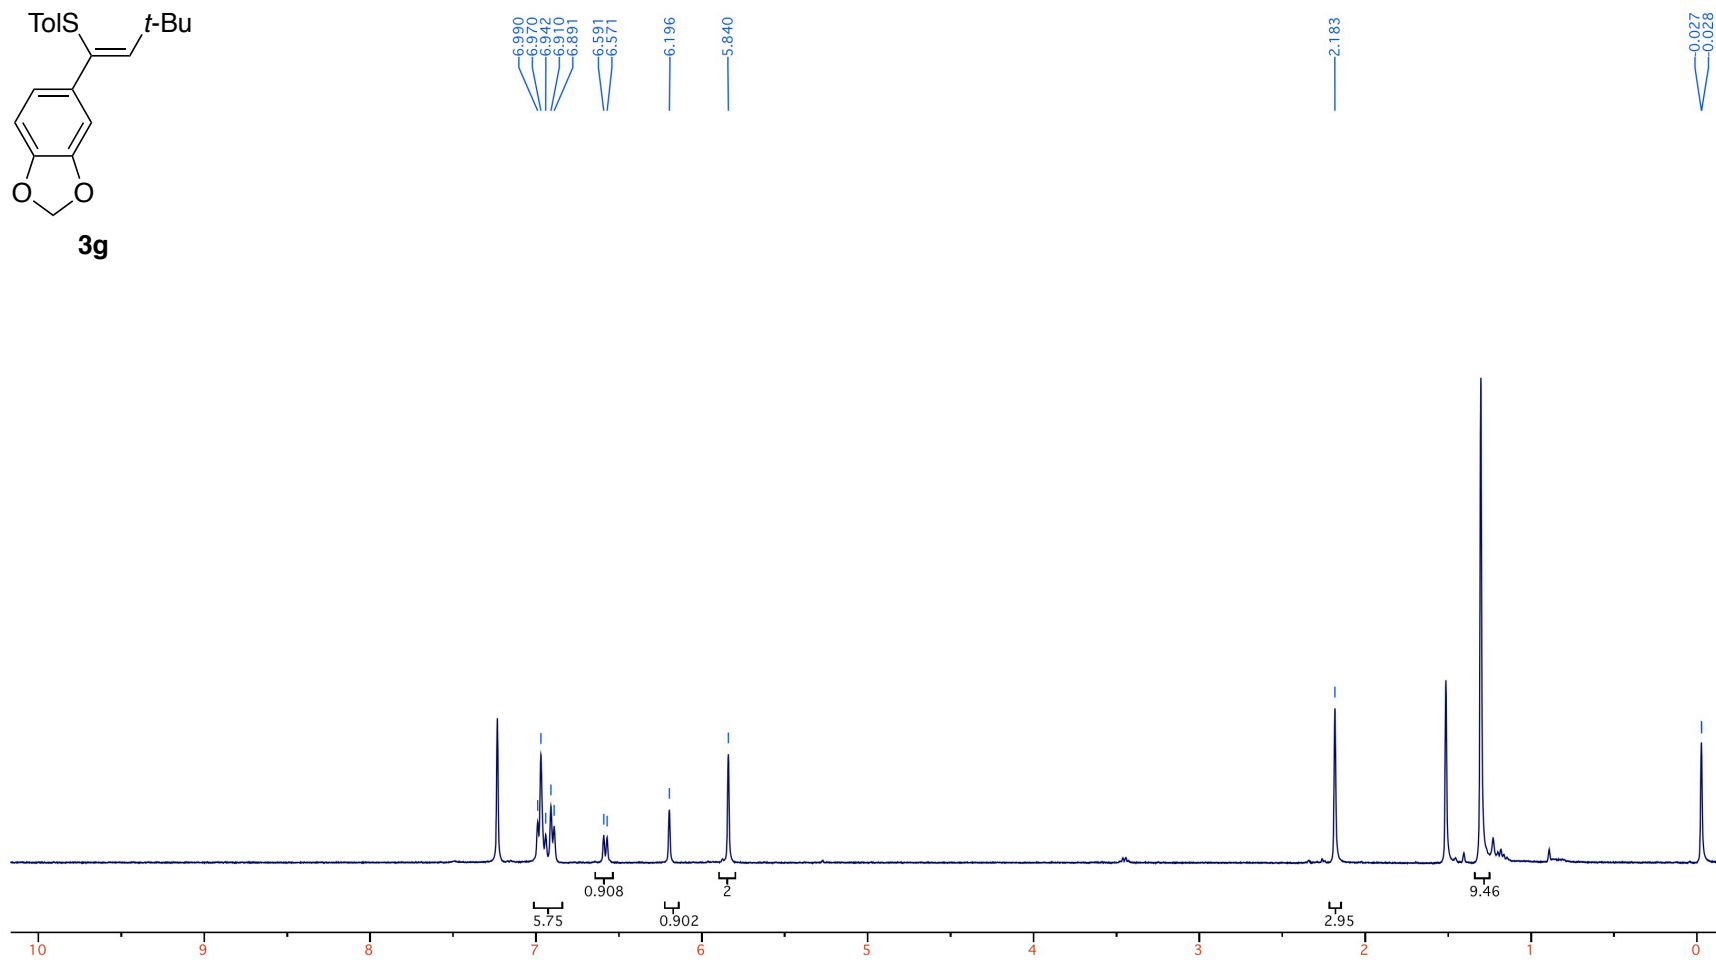

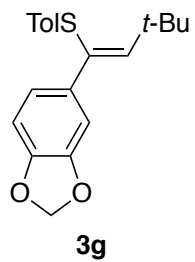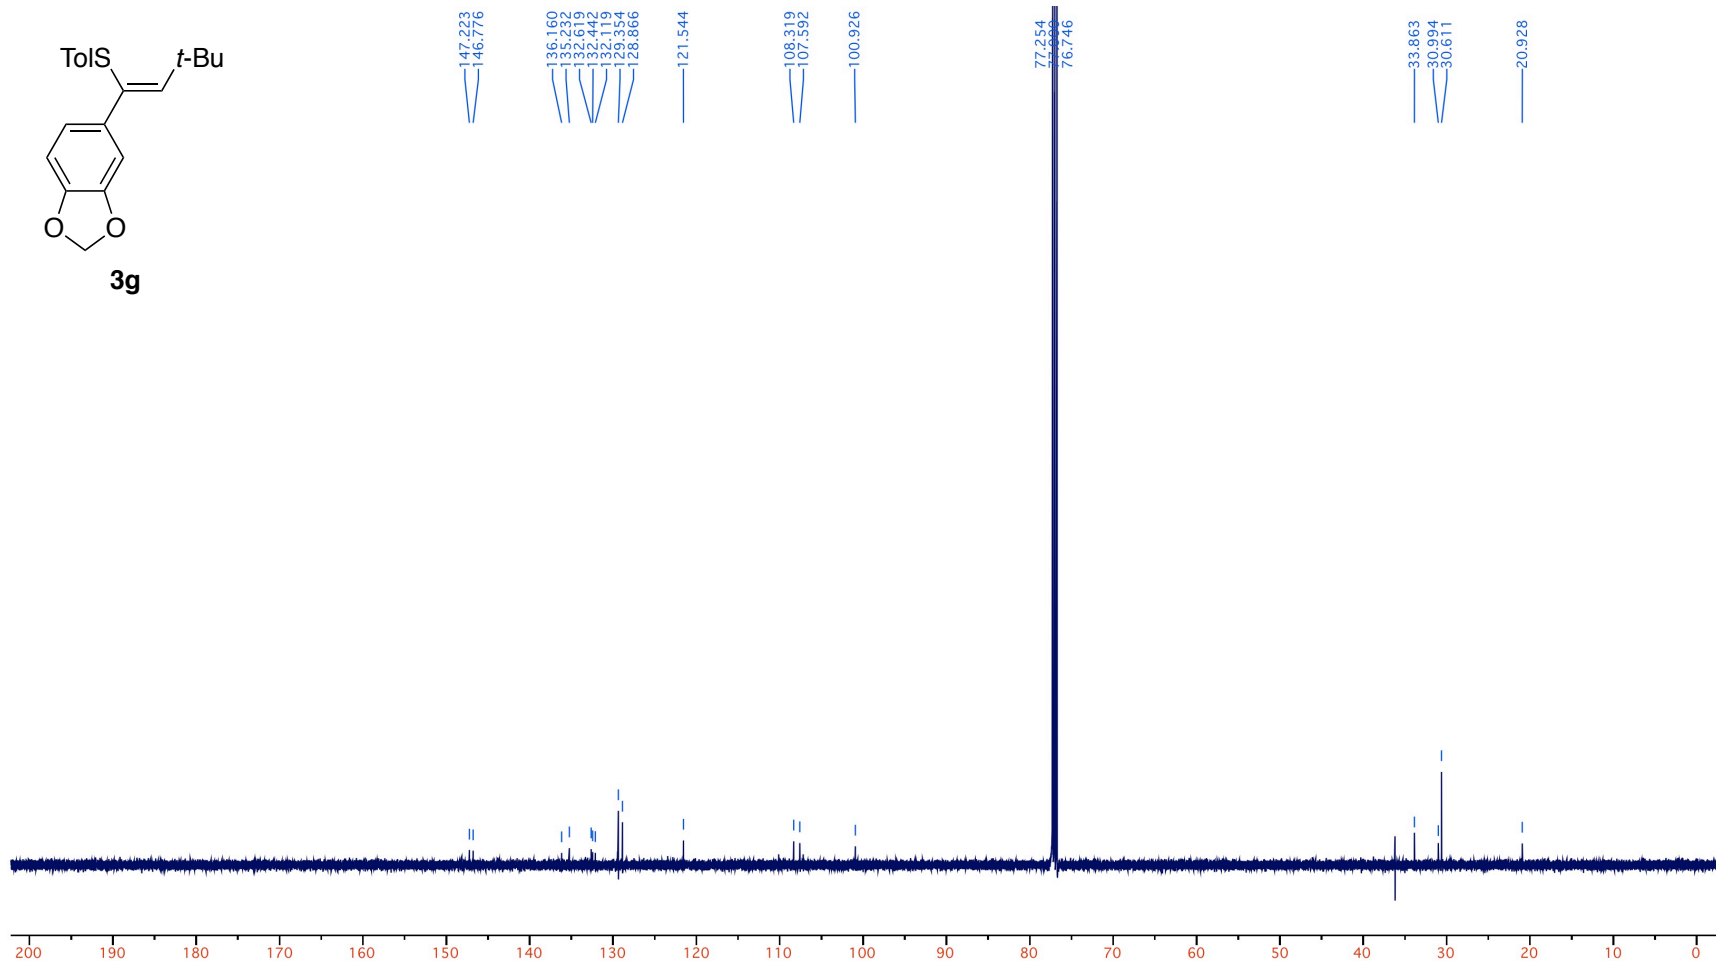

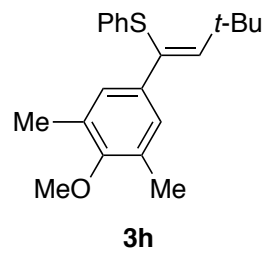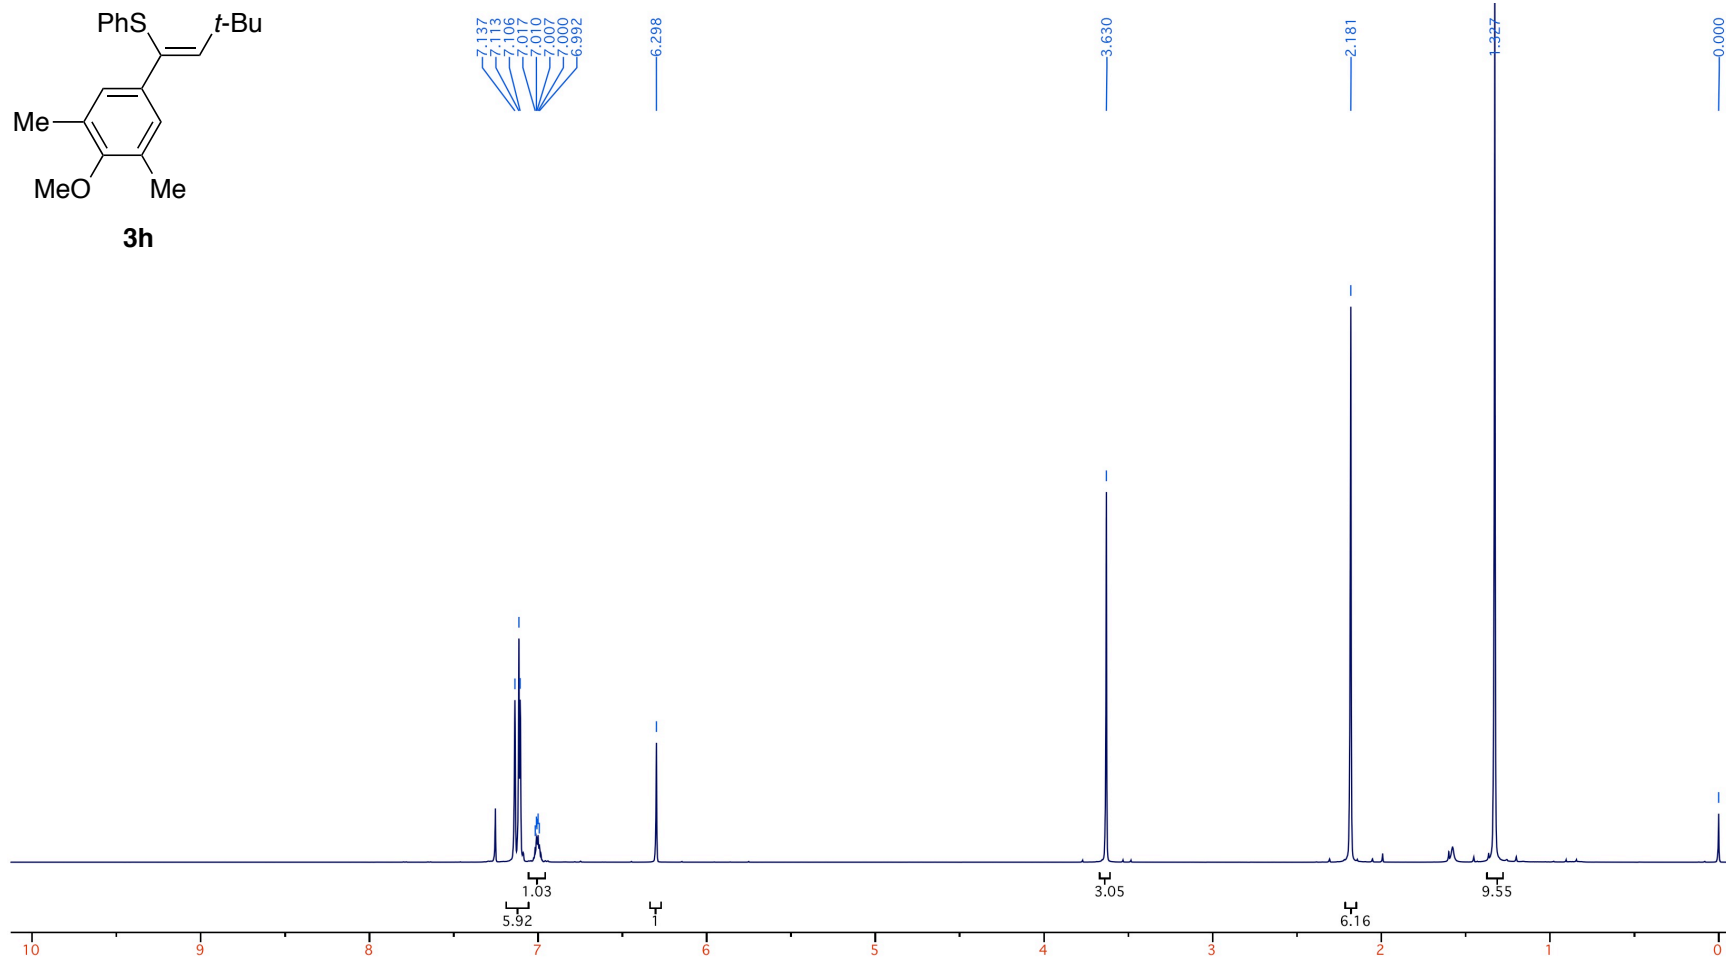



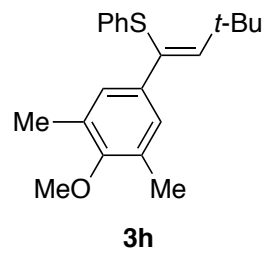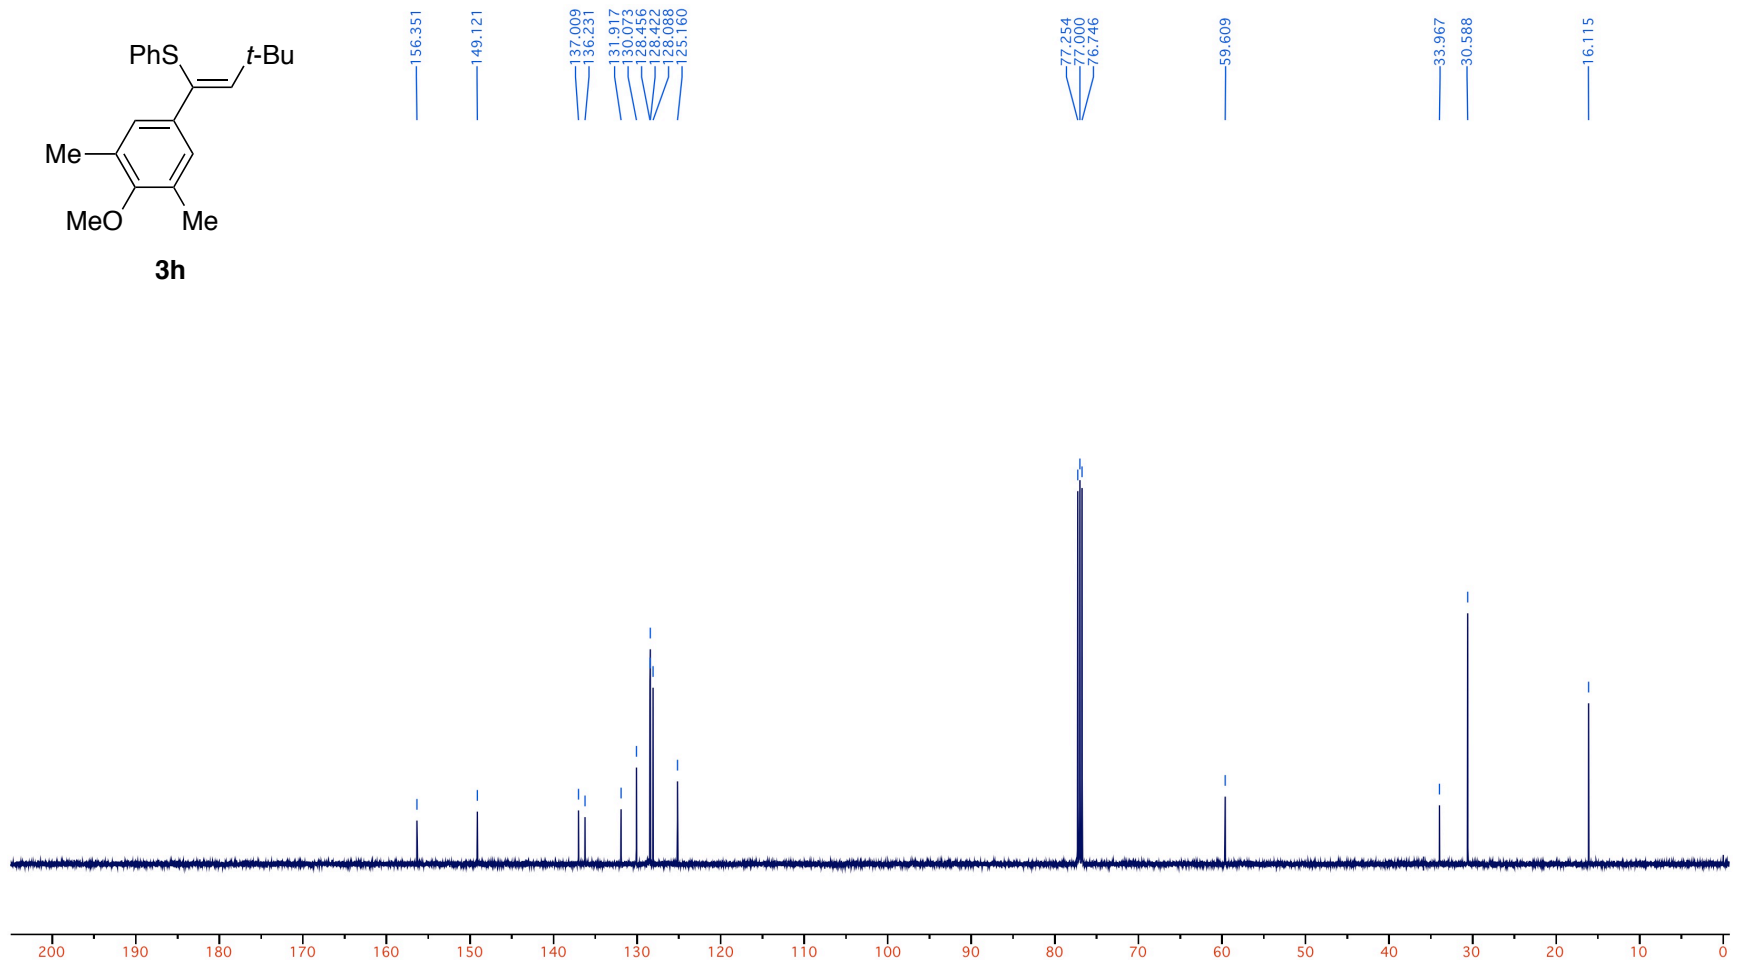

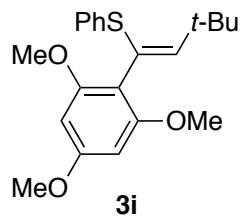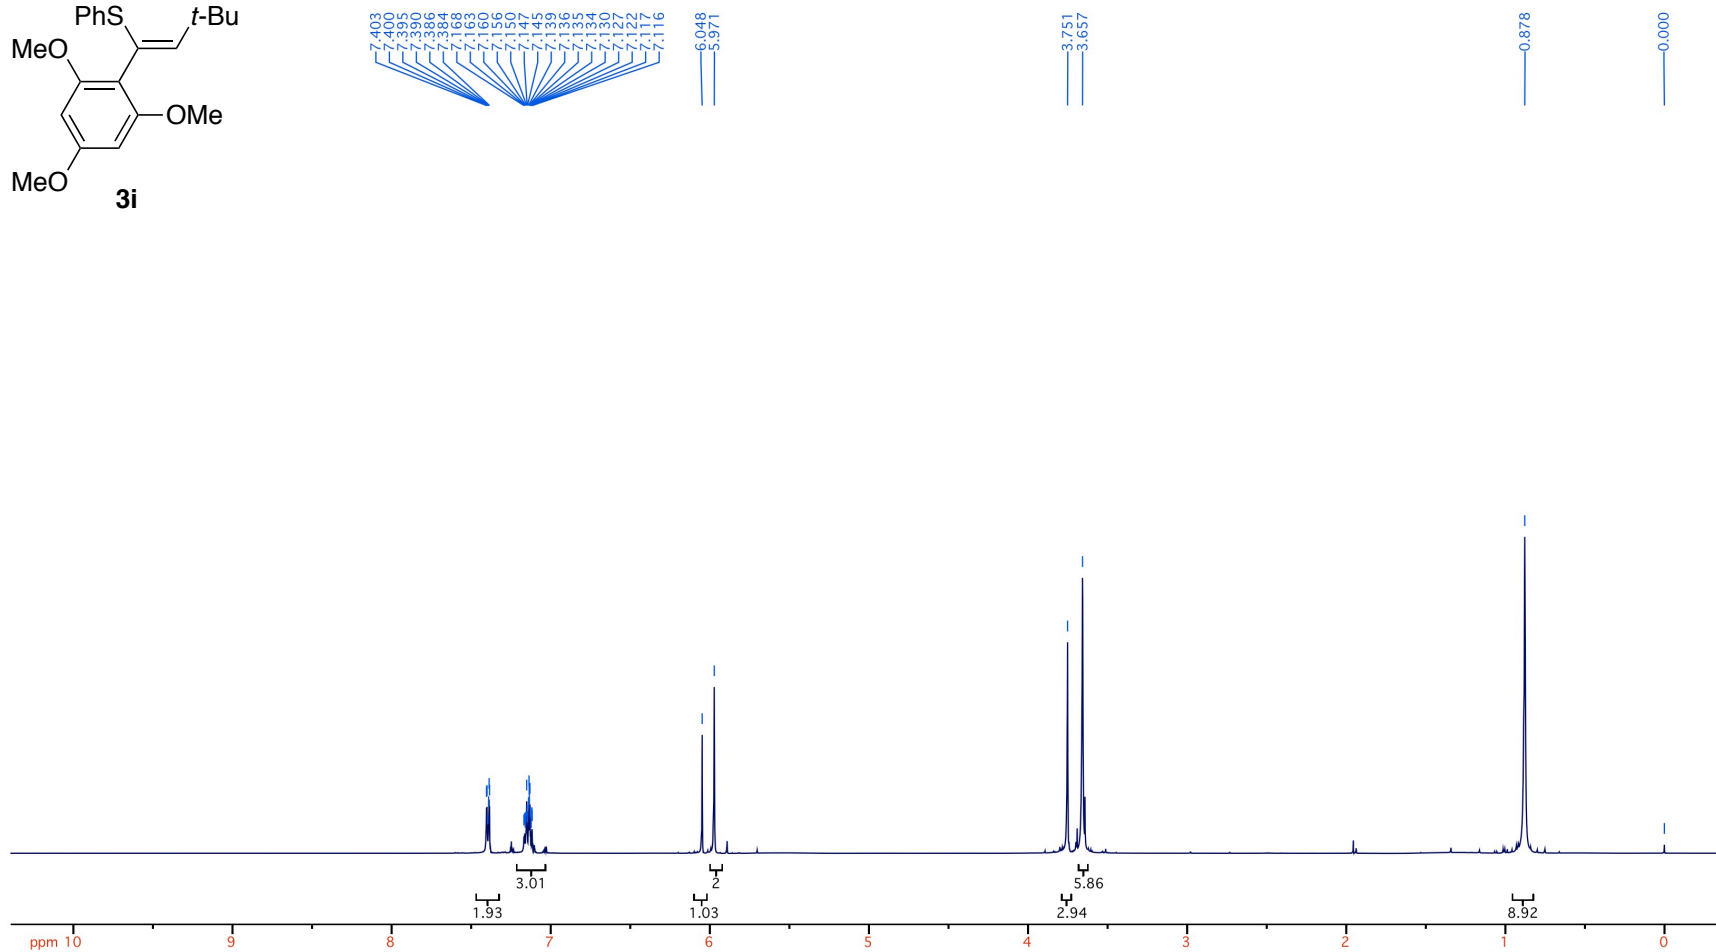

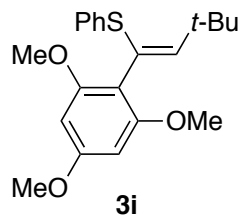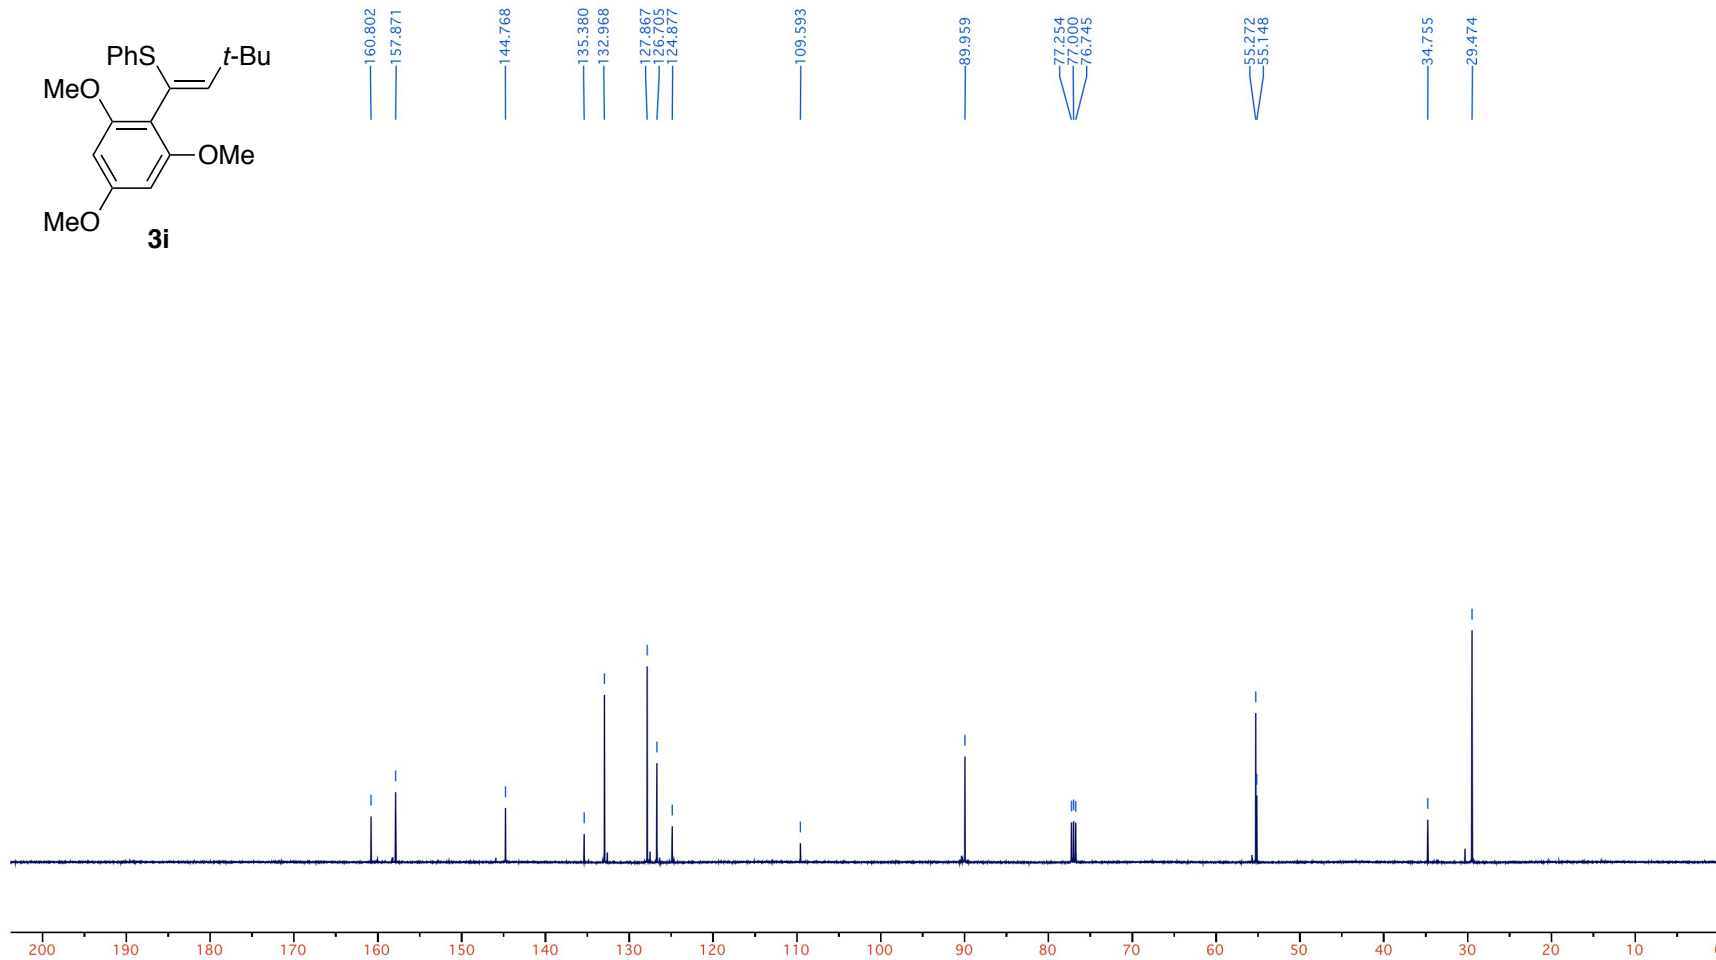

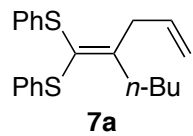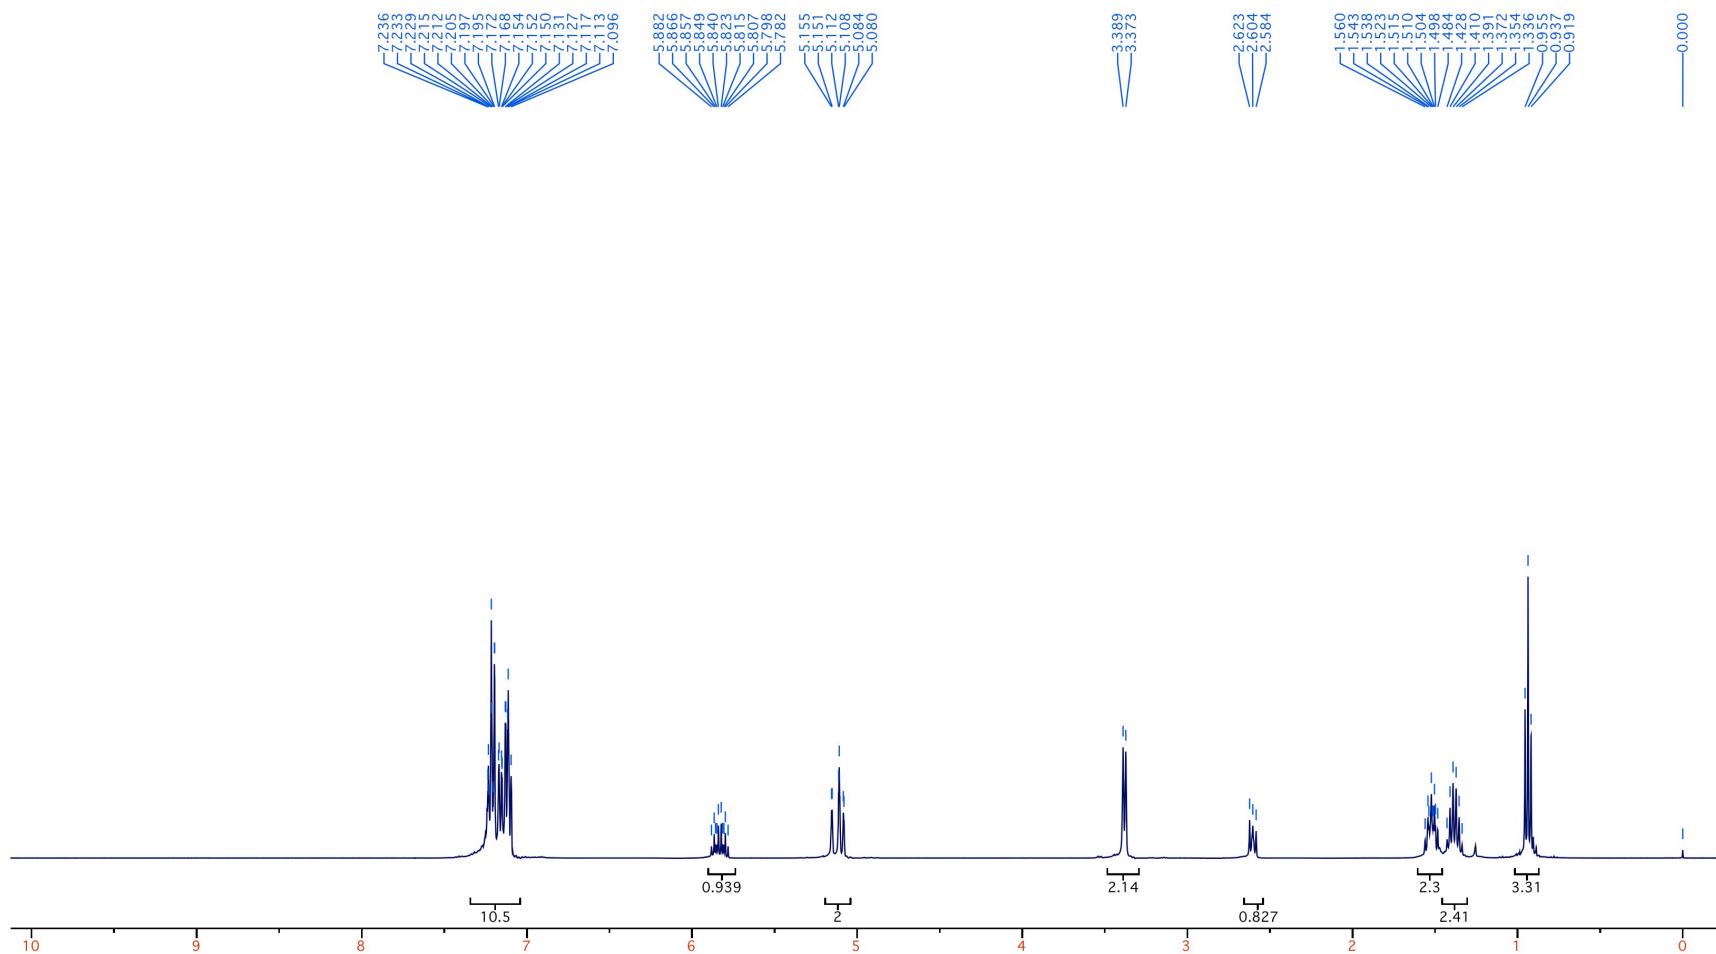

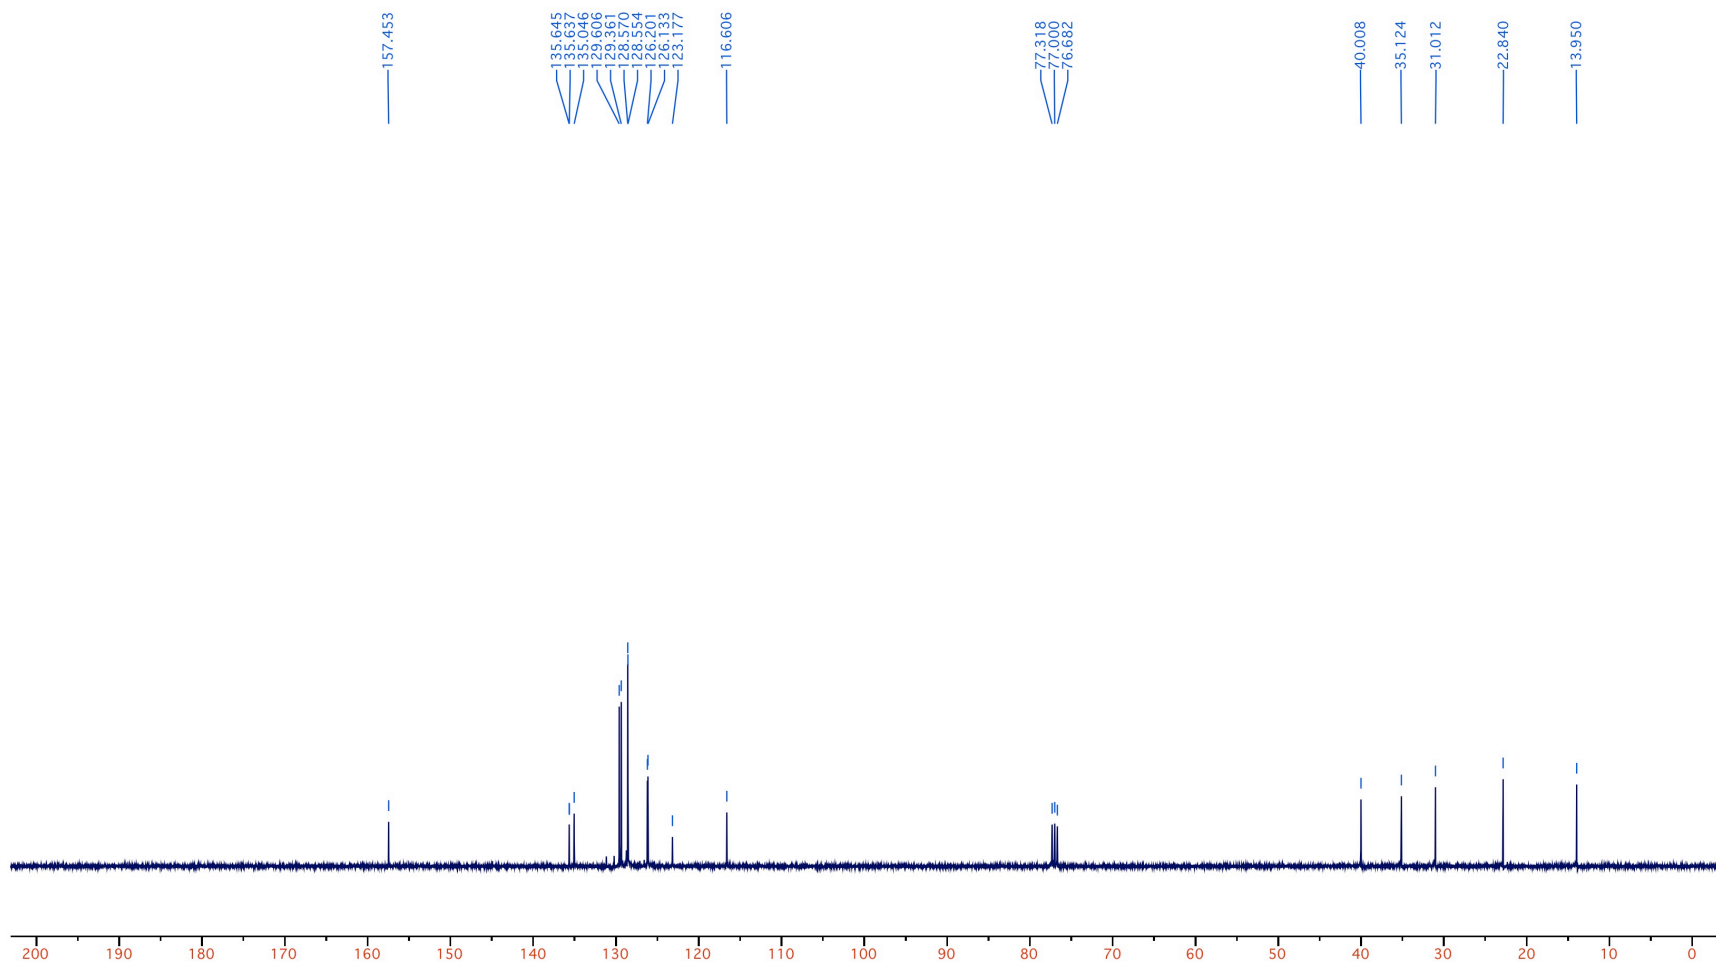



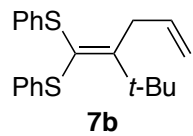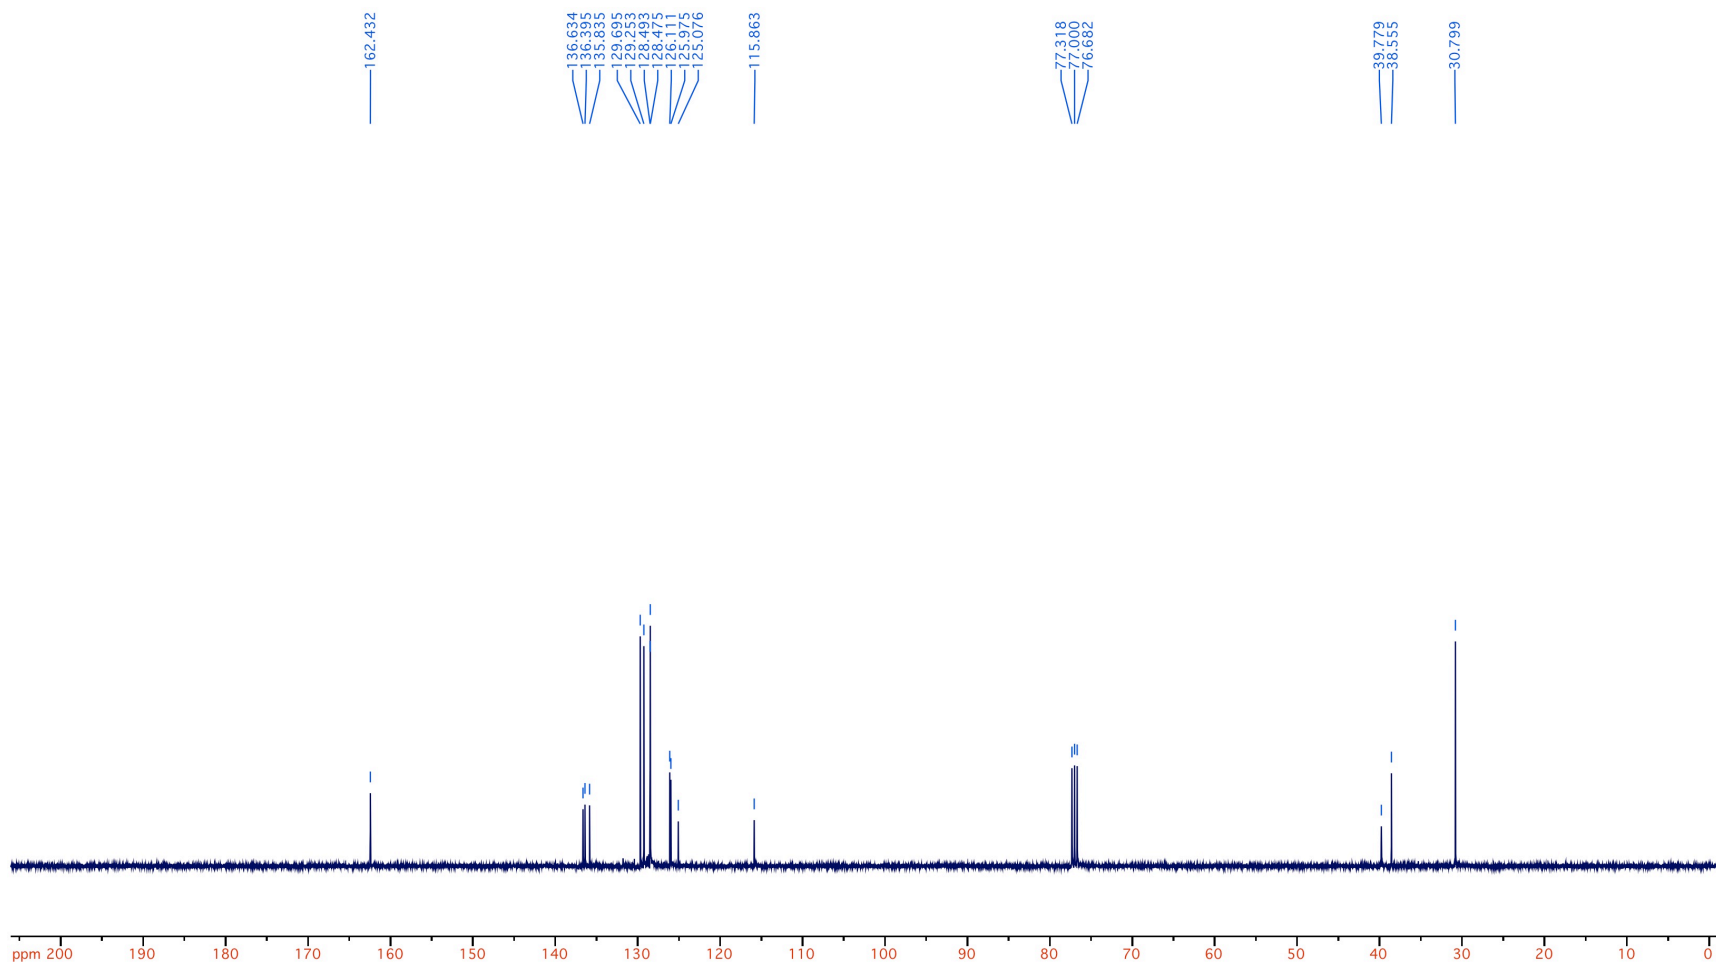





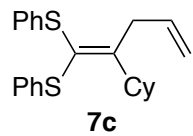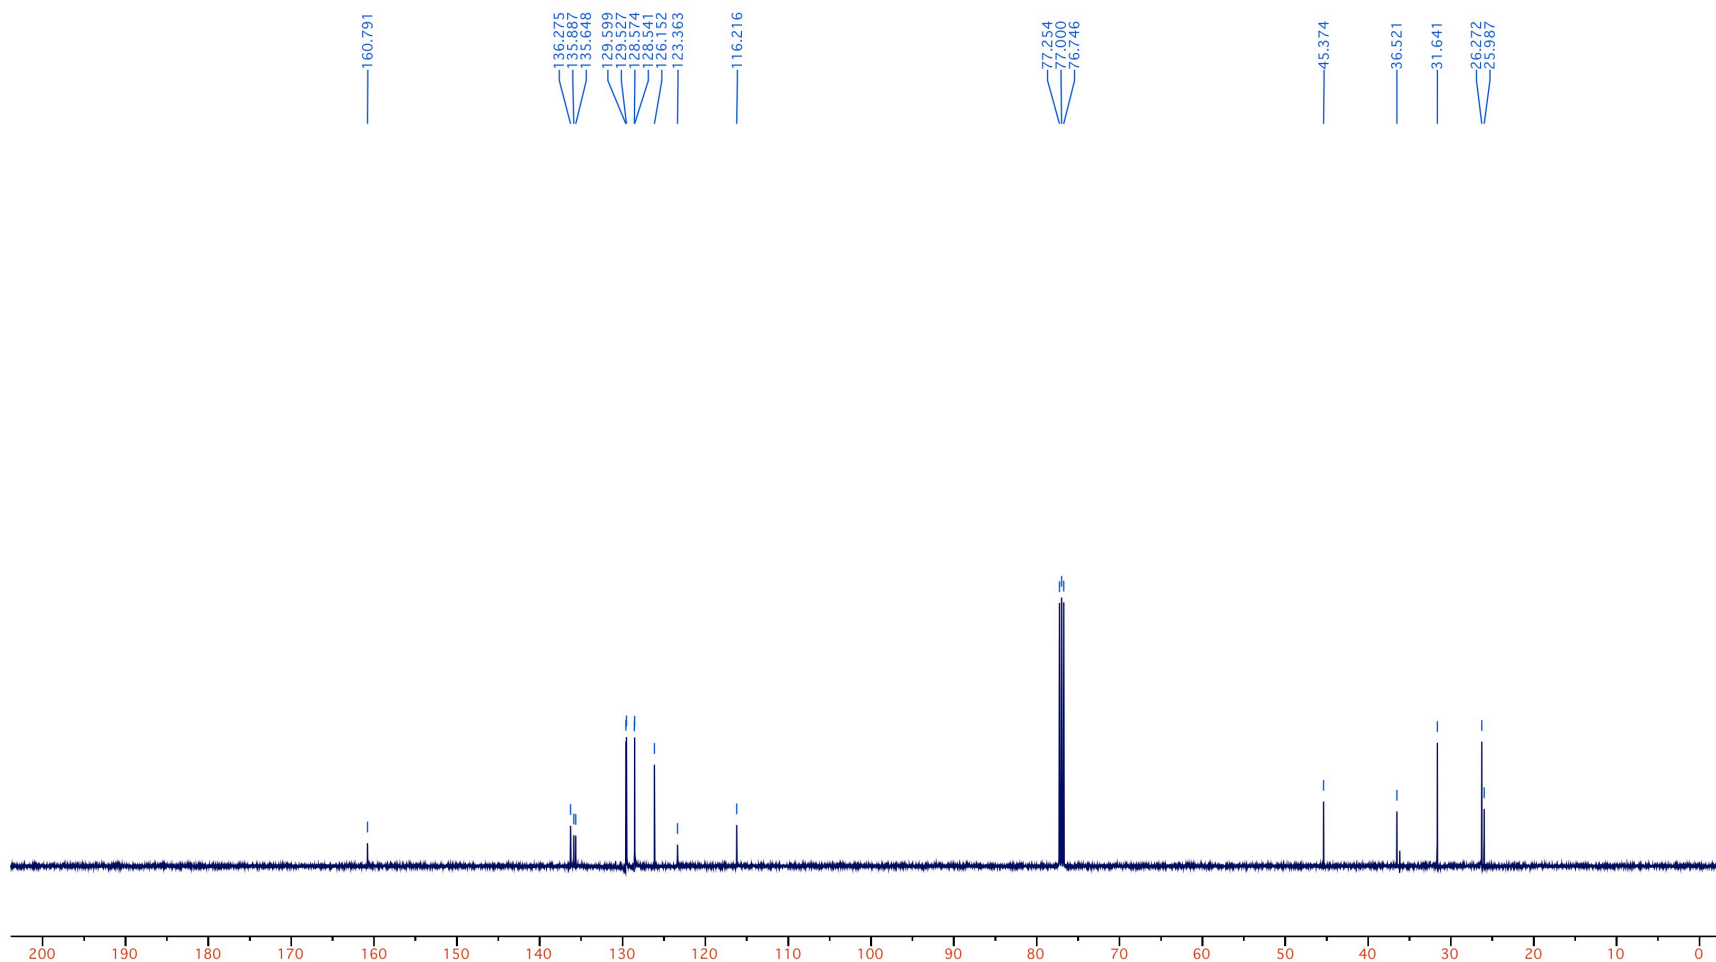

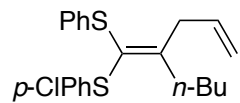

7d Z/E= 1:1

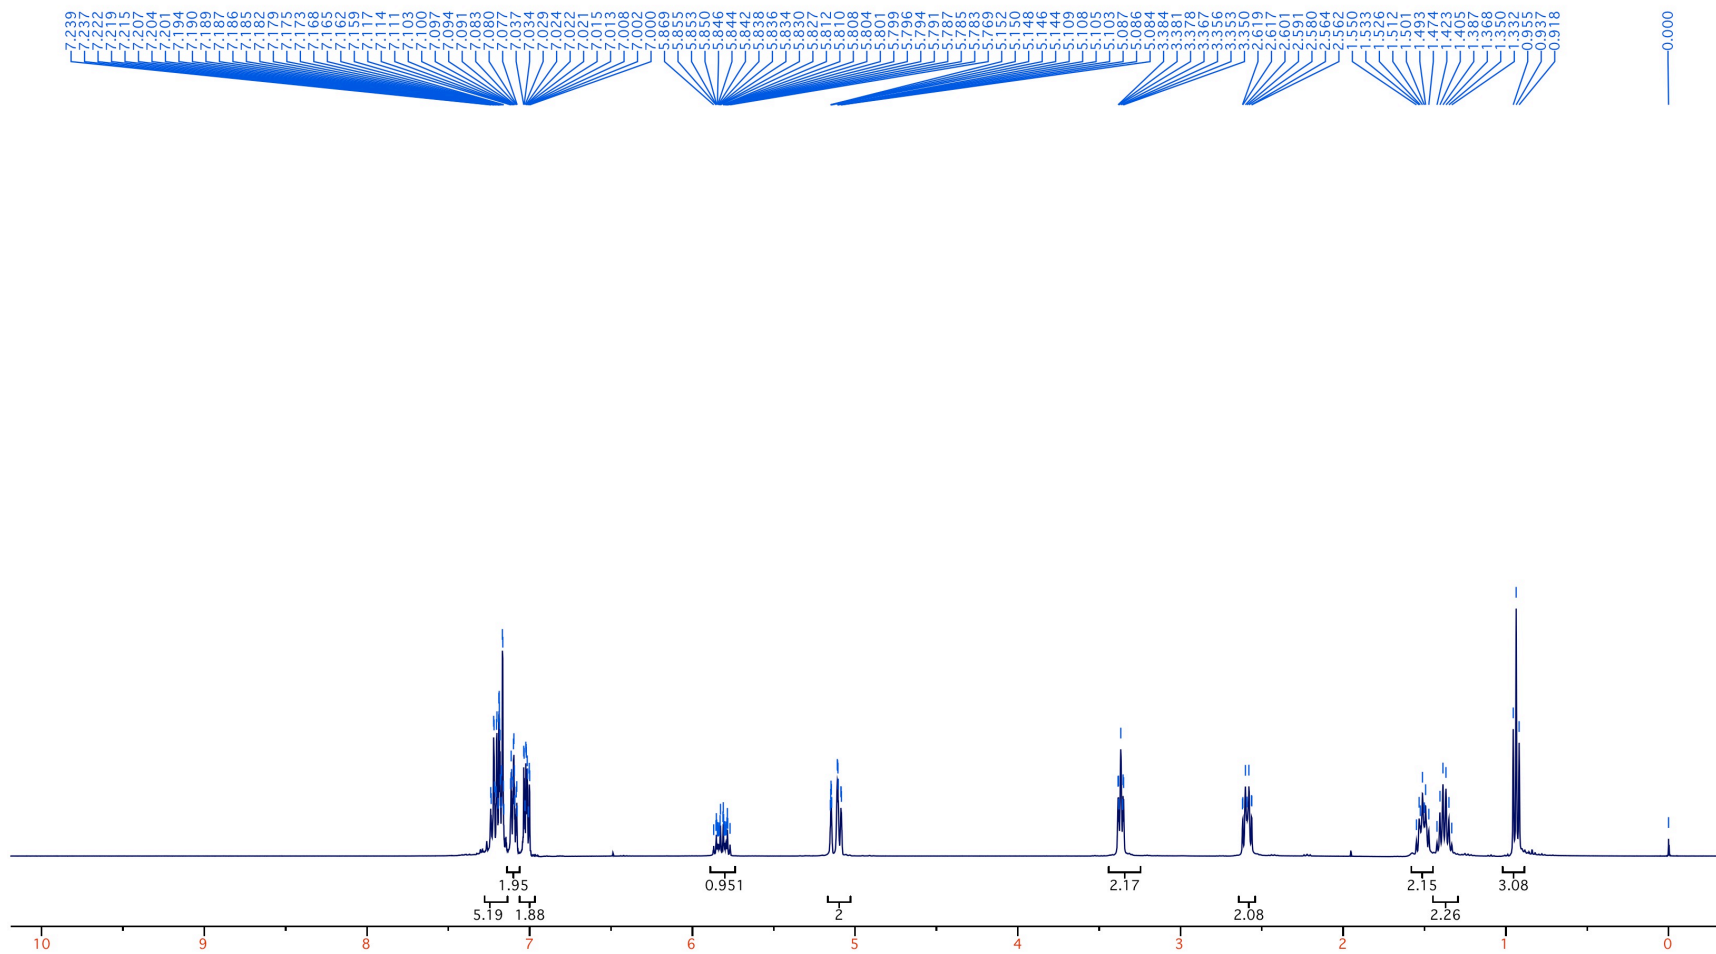

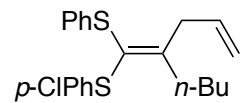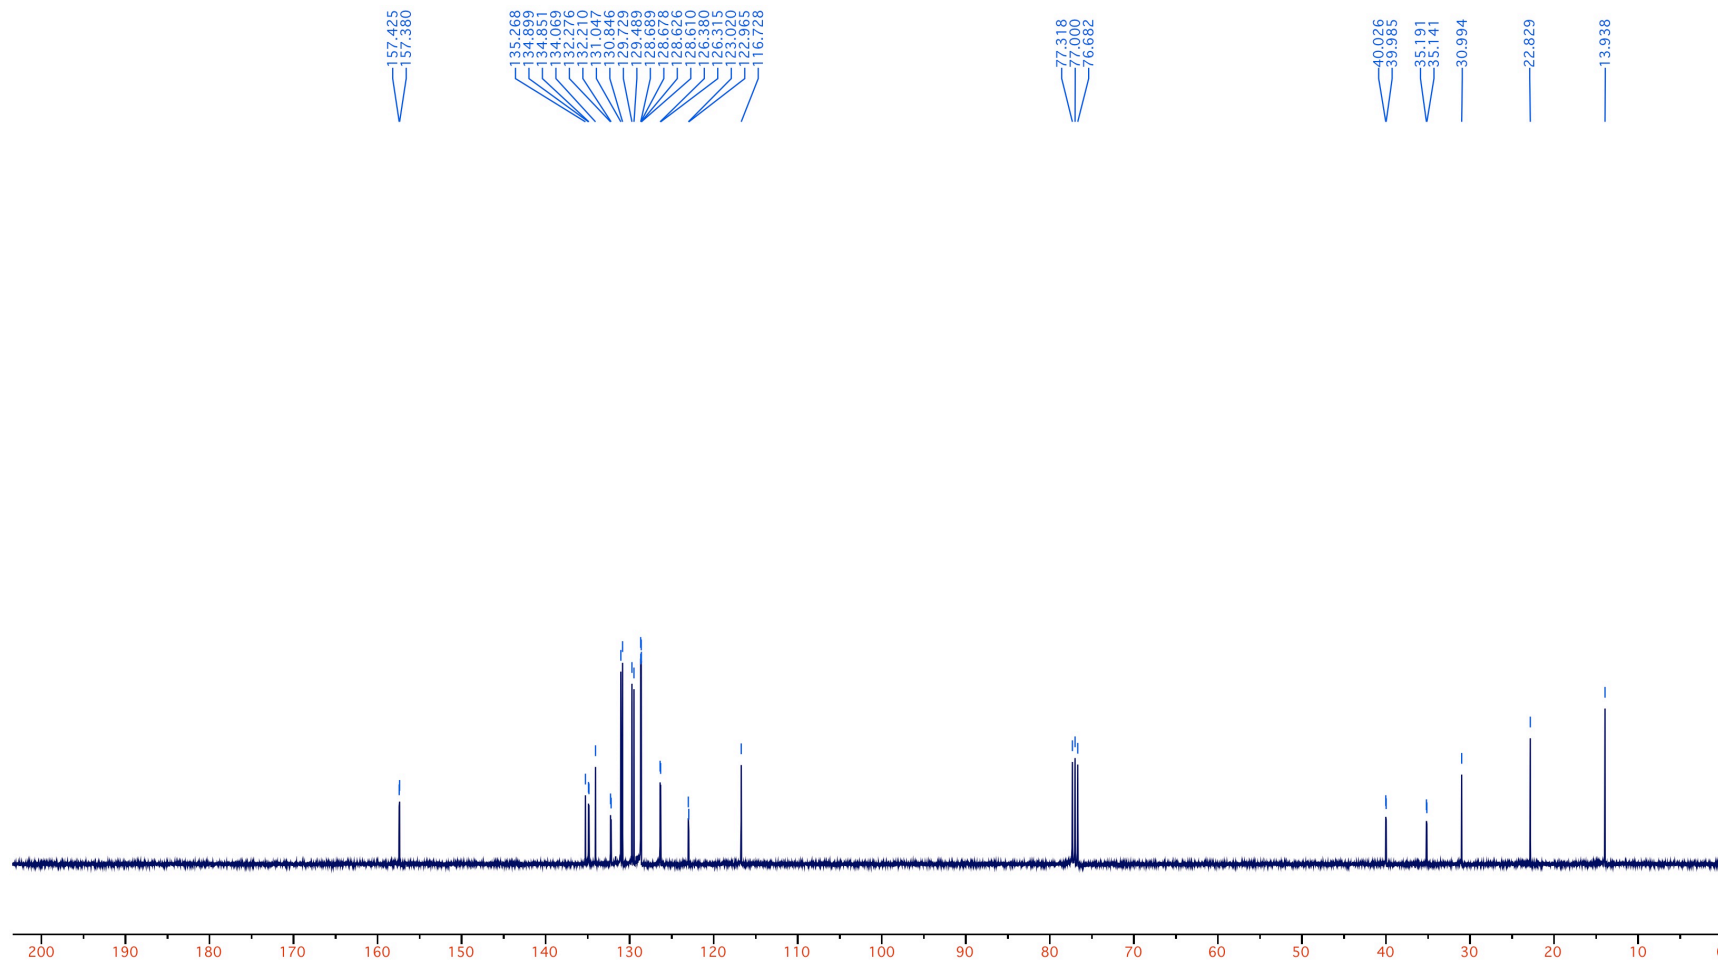

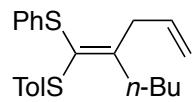

**7e** Z/E= 1:1

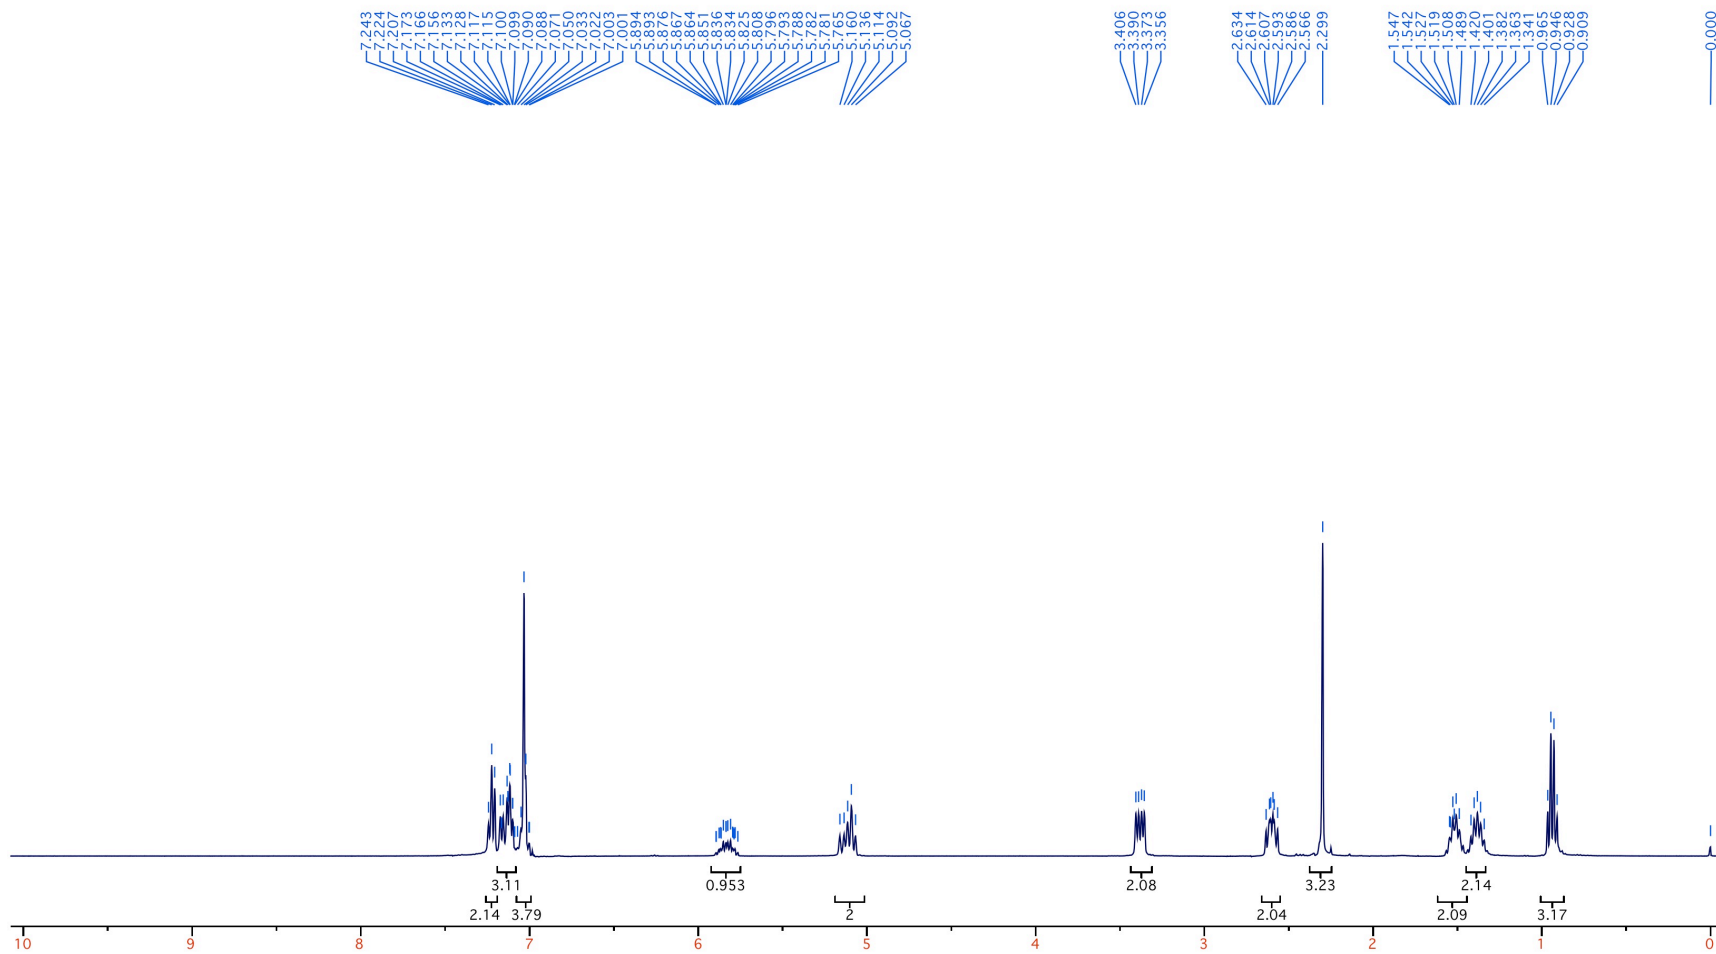



7e Z/E= 1:1

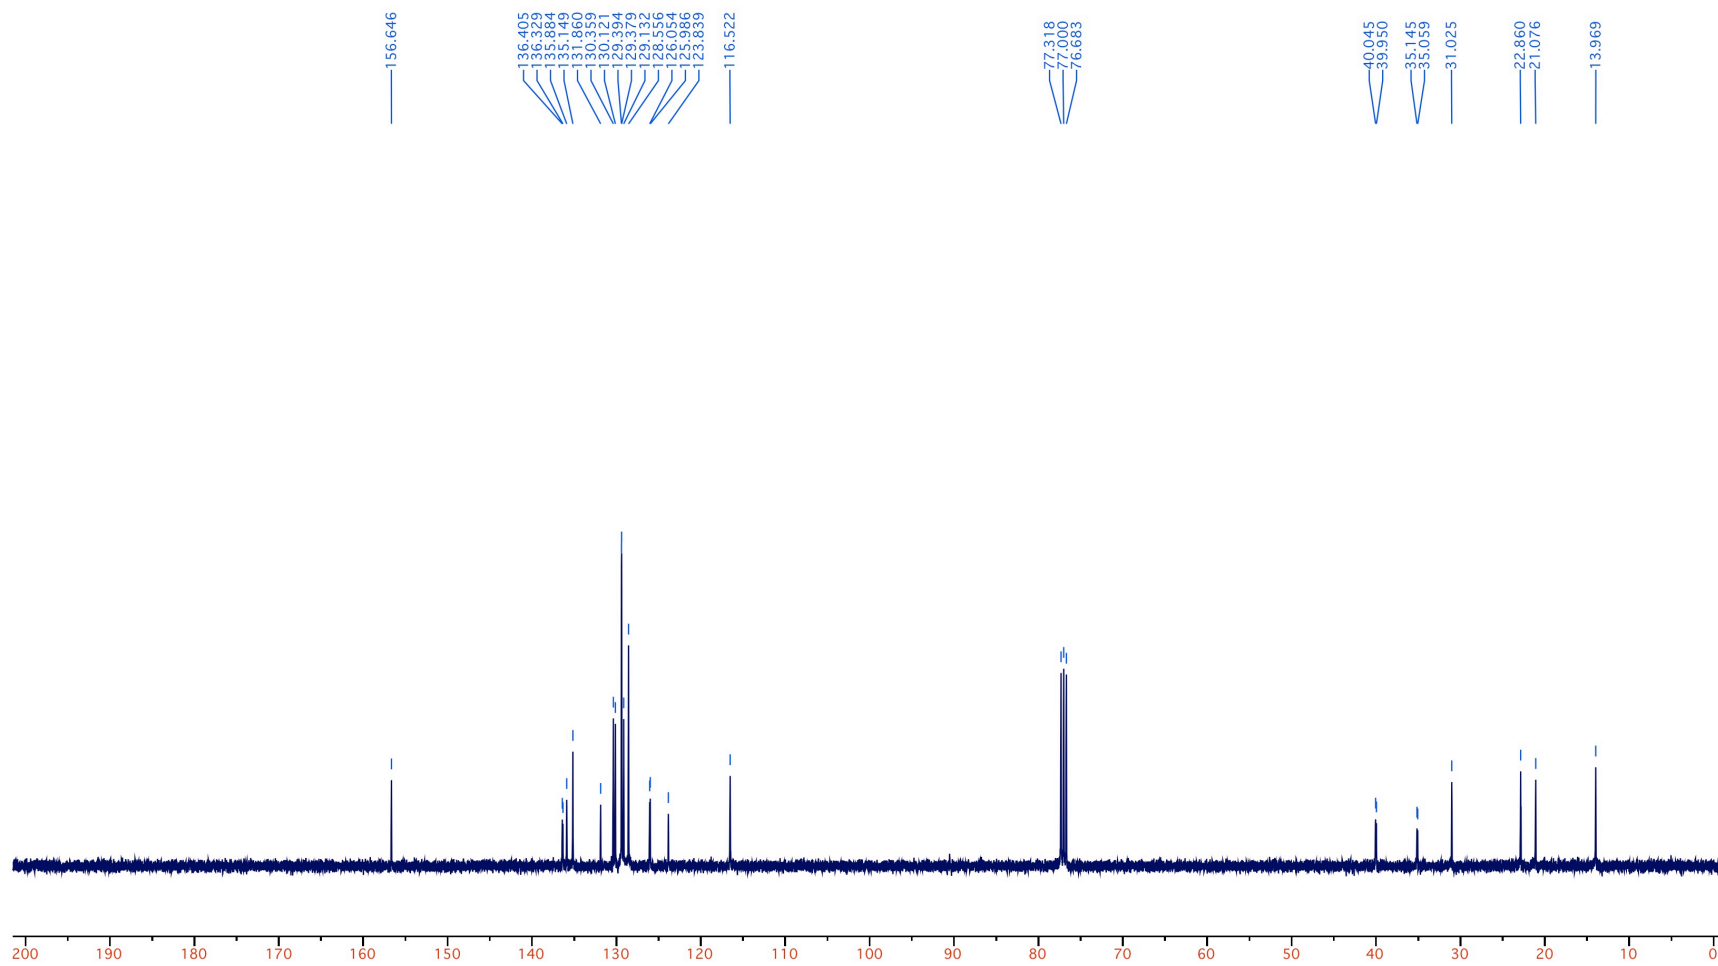

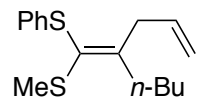

7f Z/E= 1:1

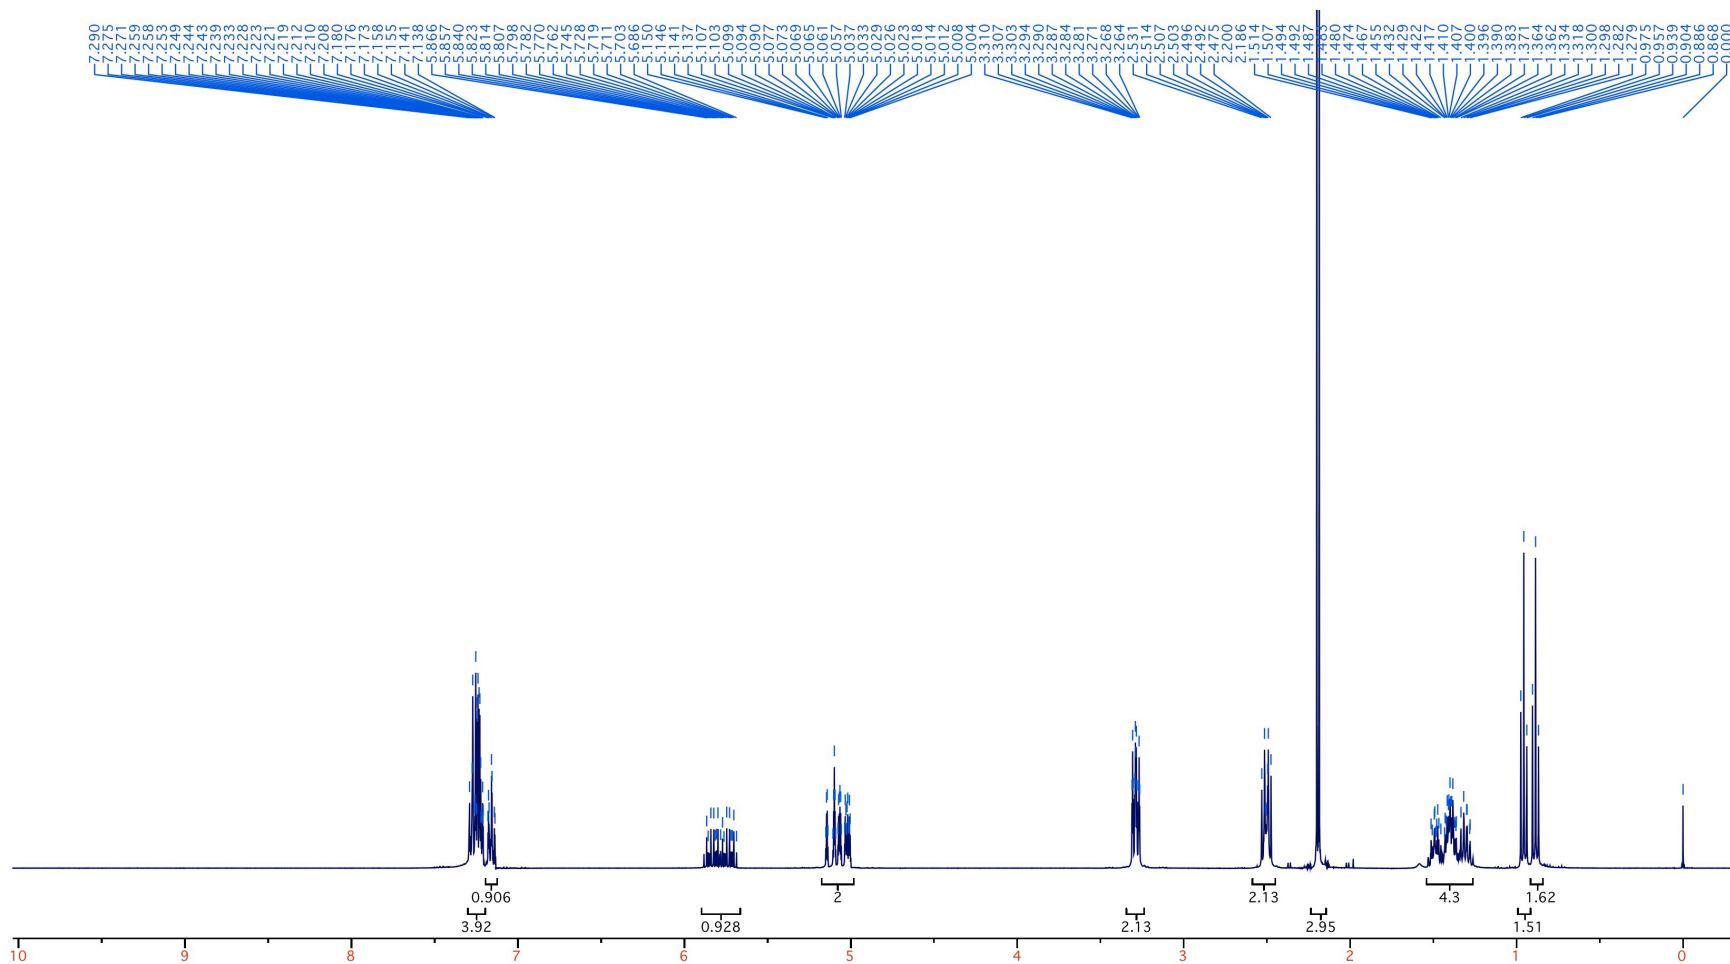

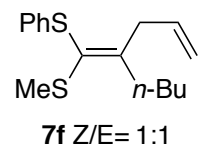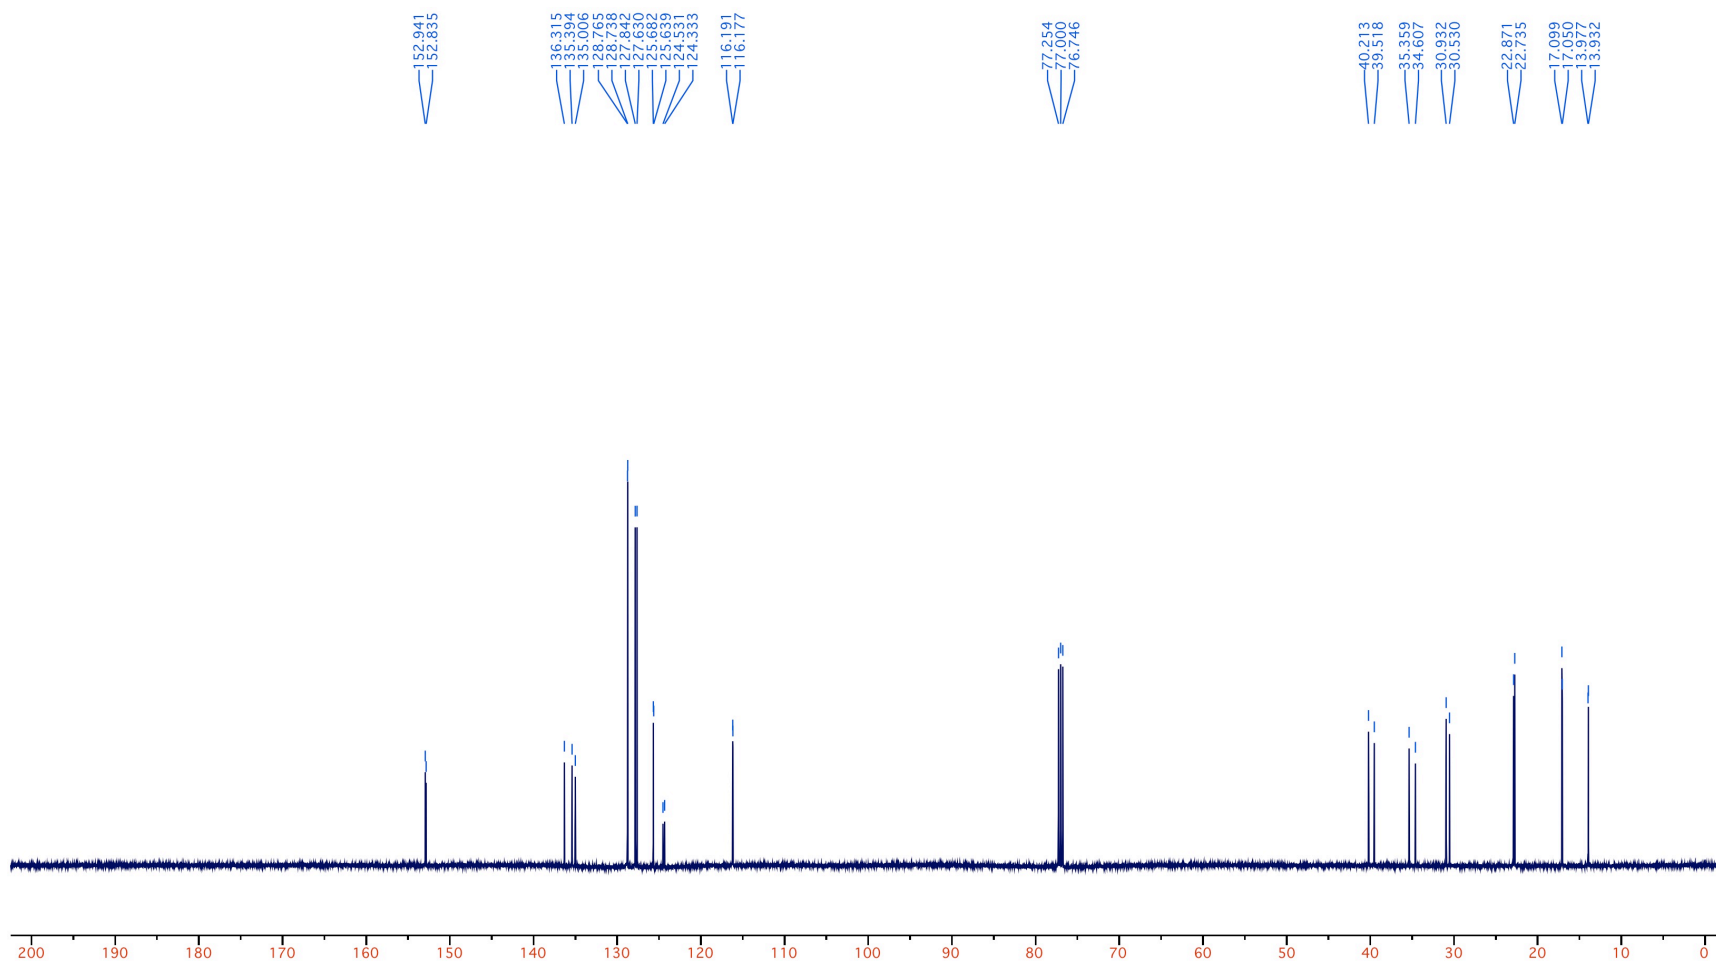

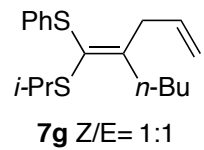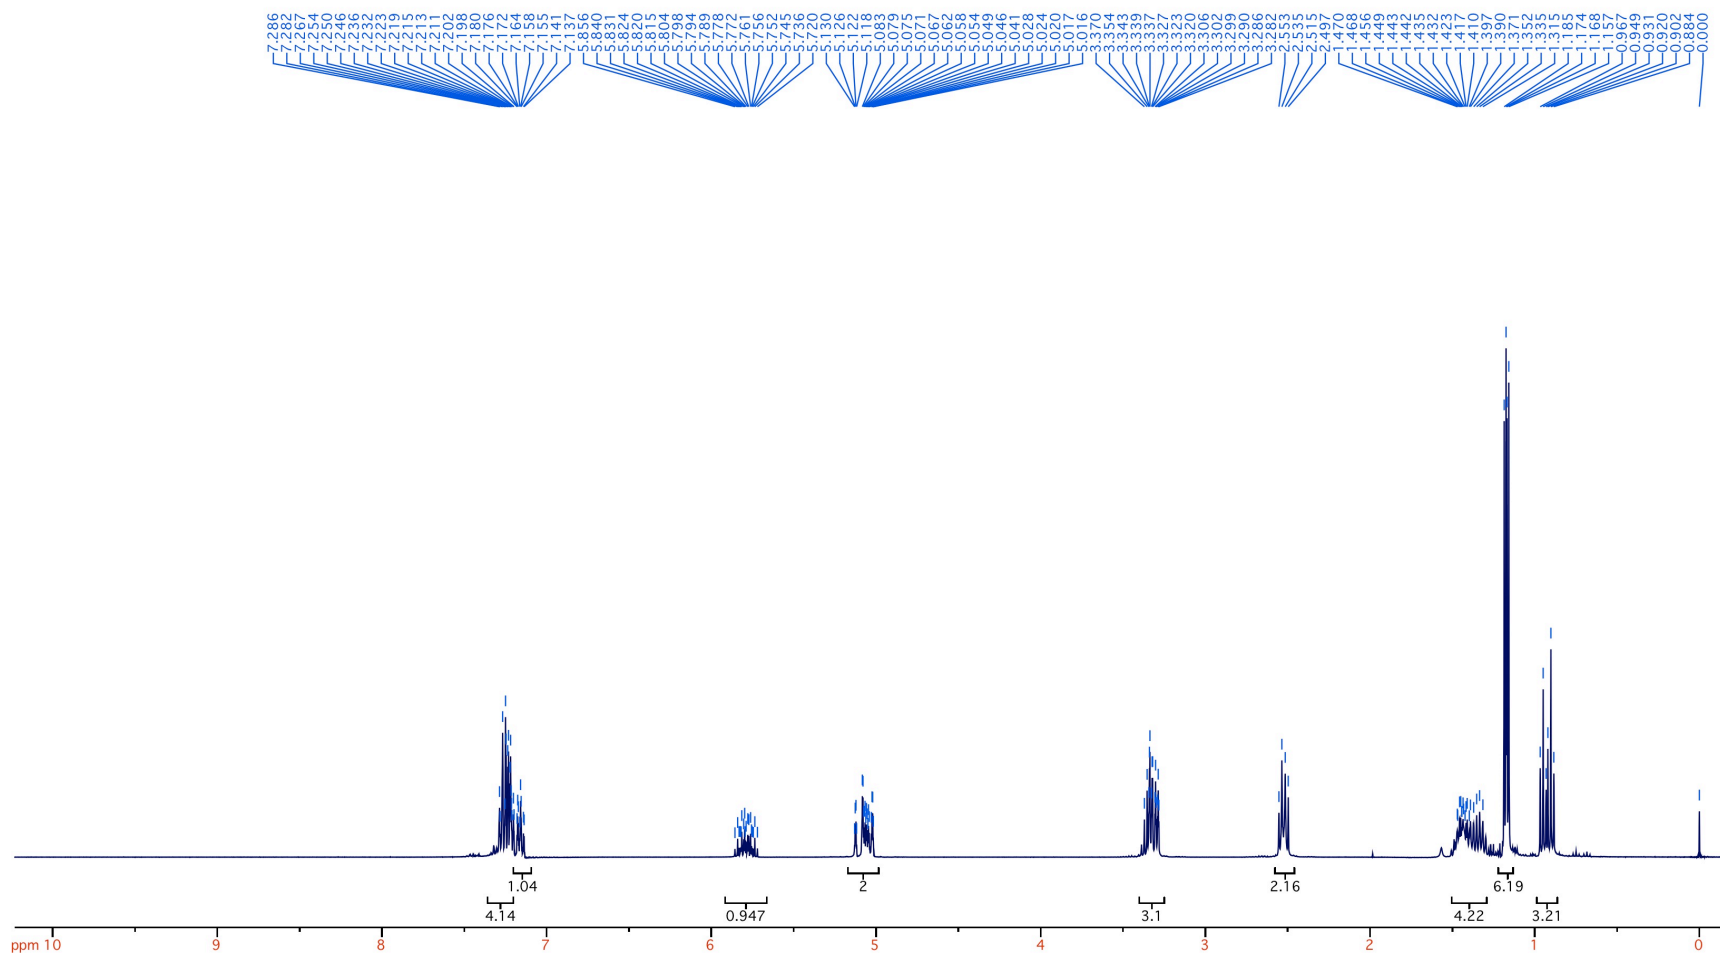



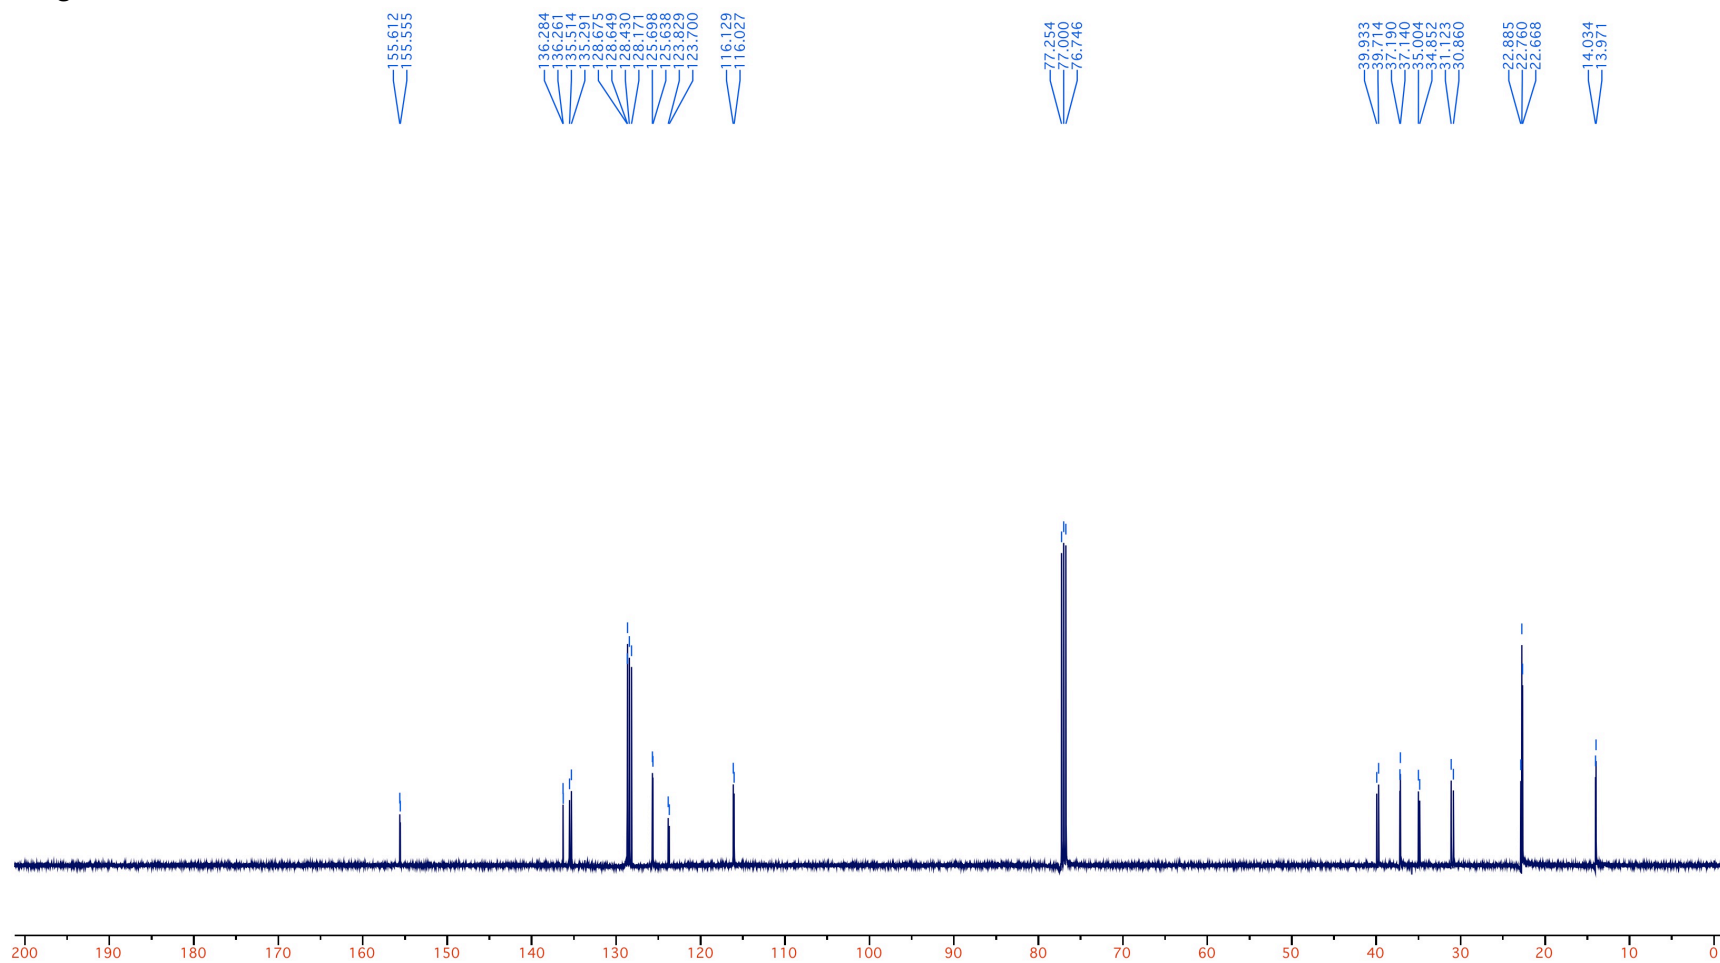

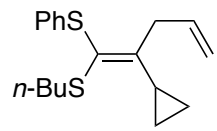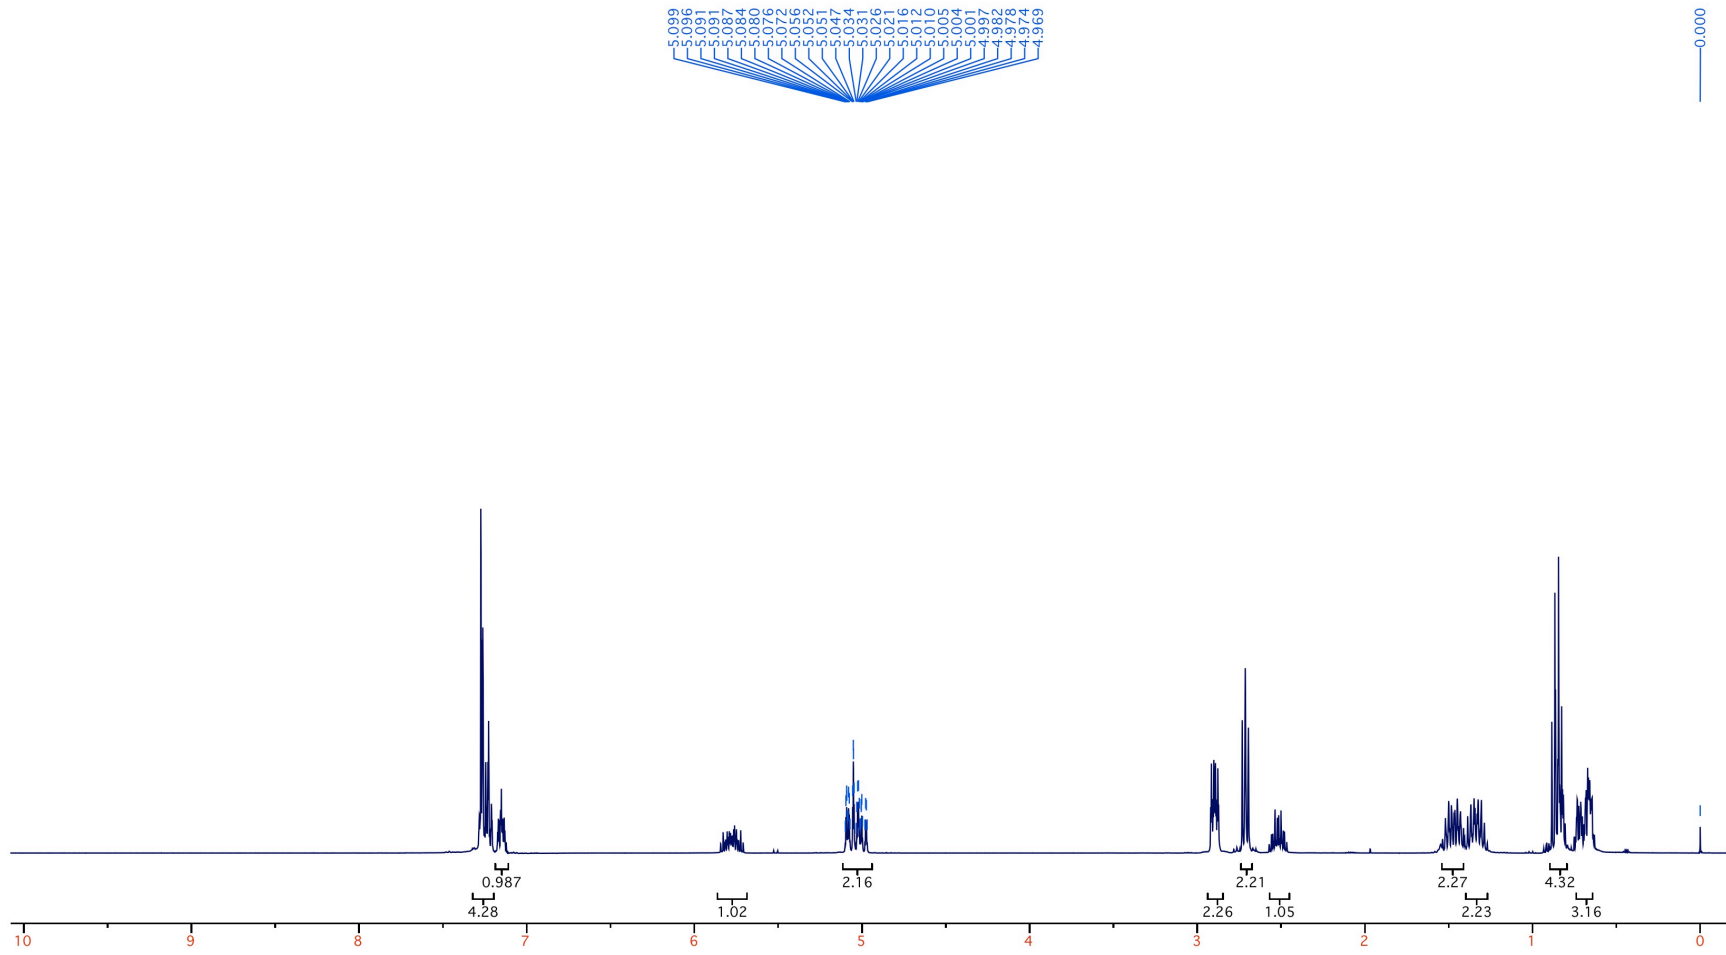

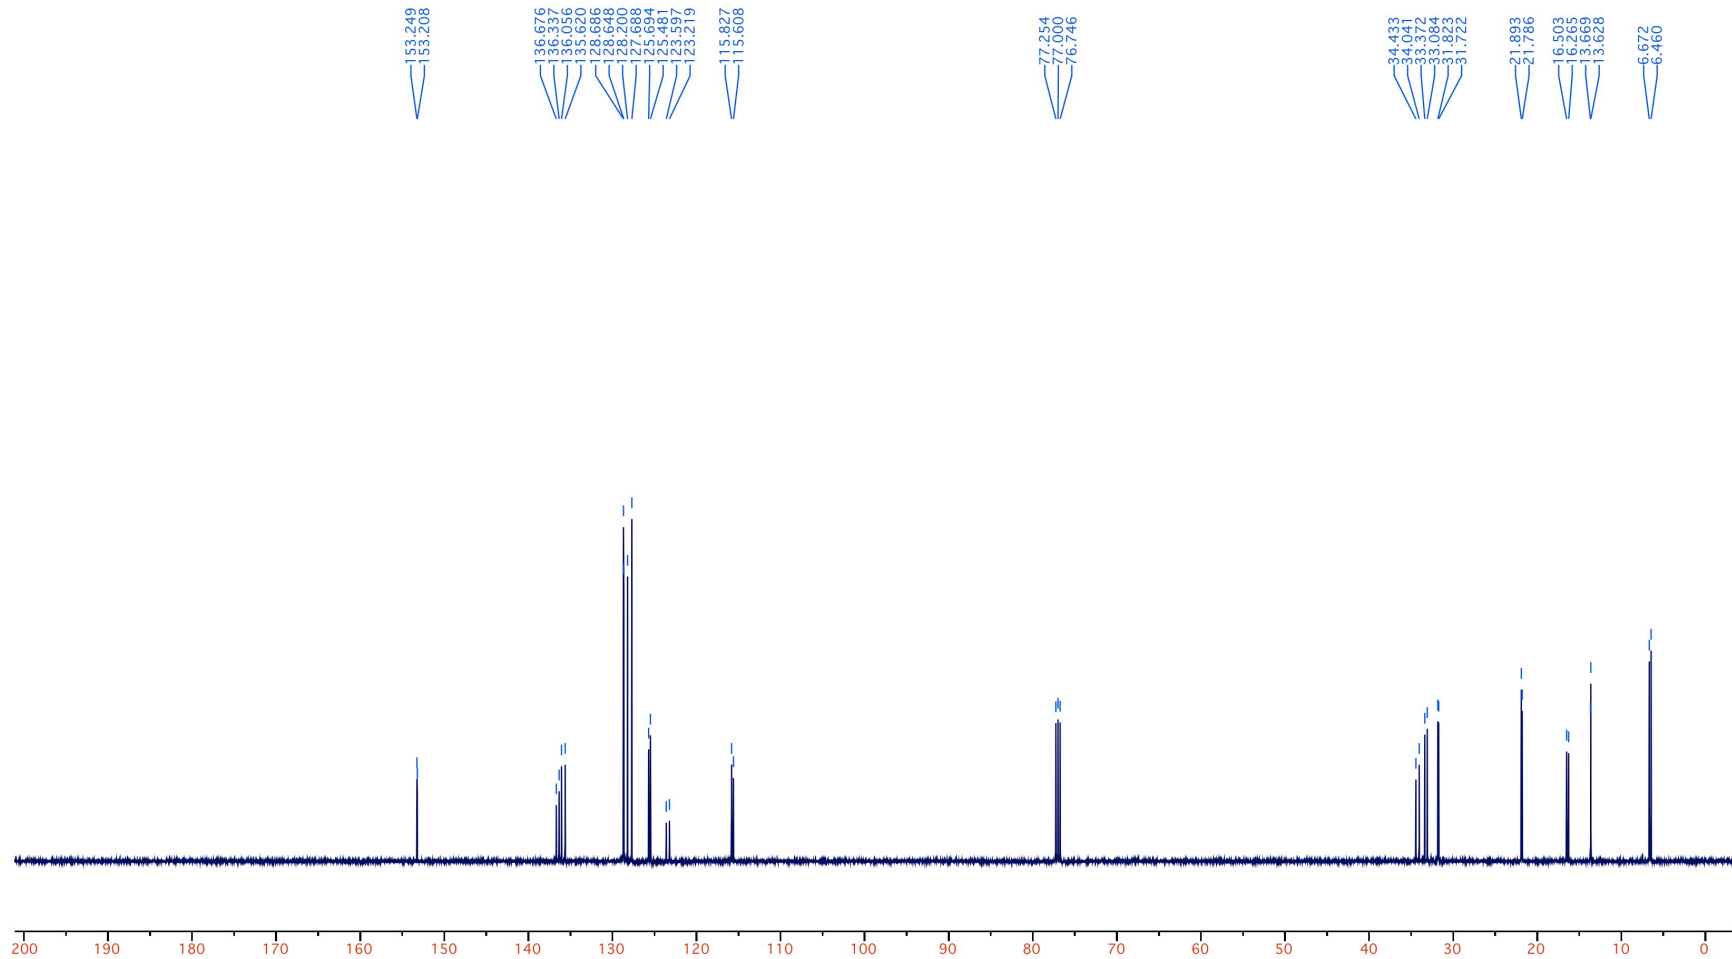

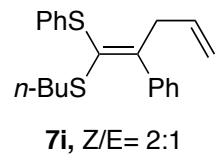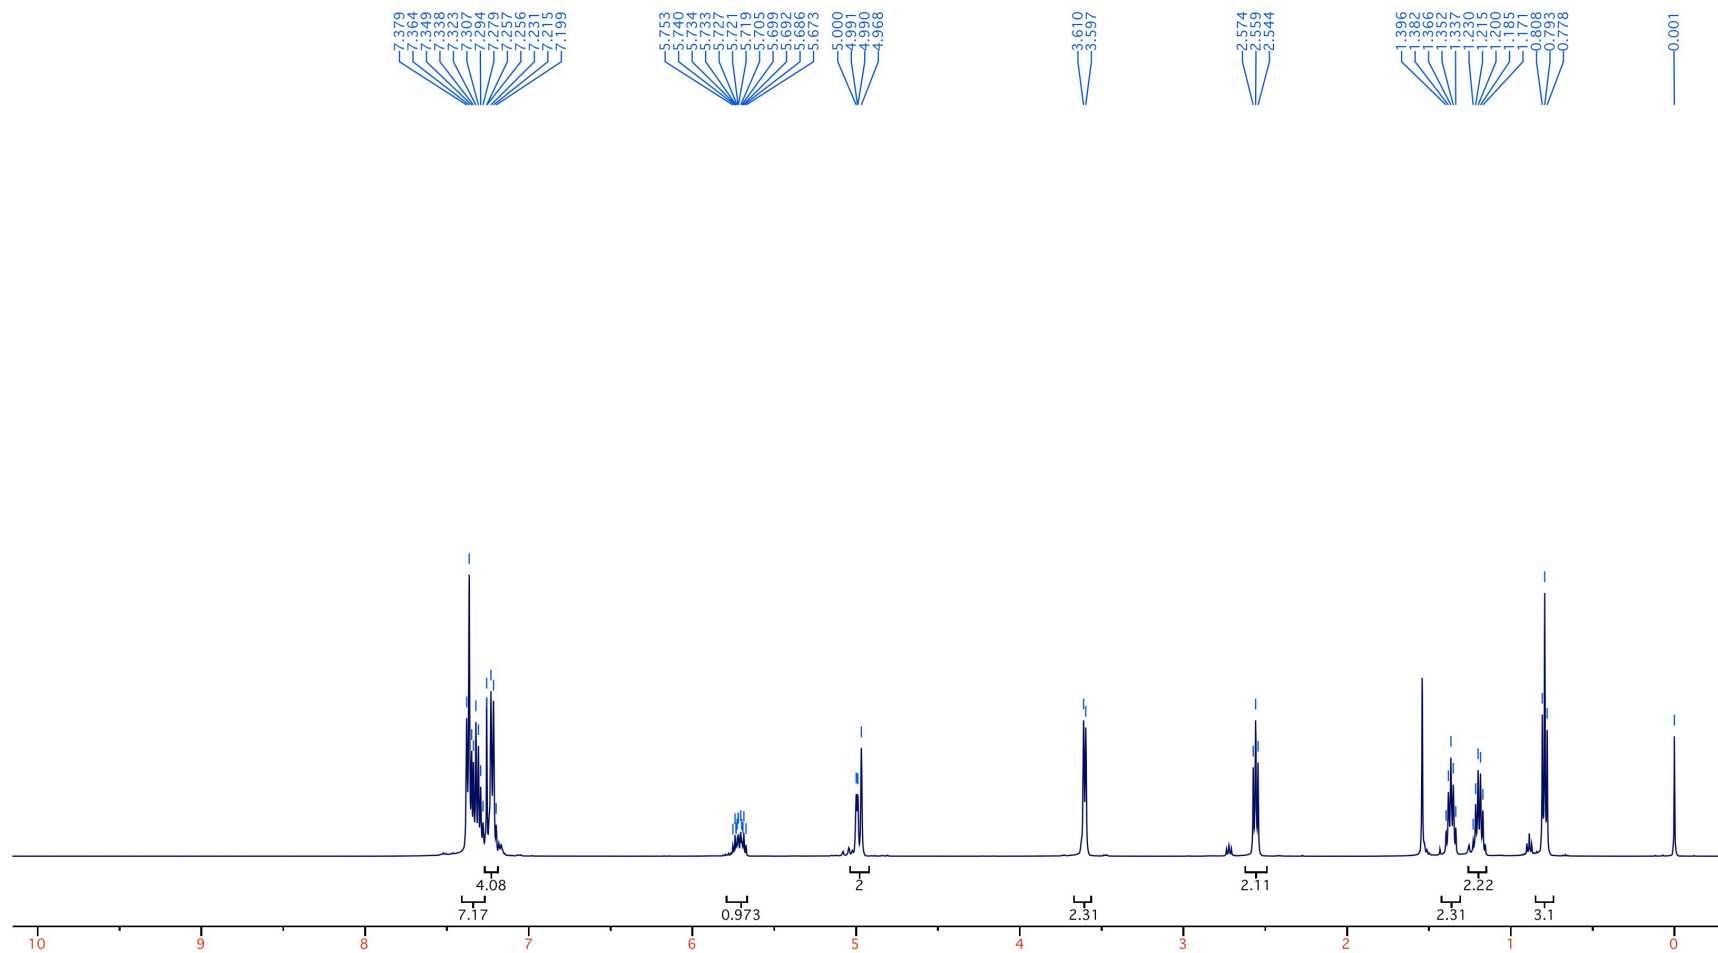

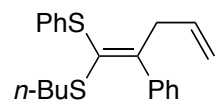

7i, Z/E= 2:1

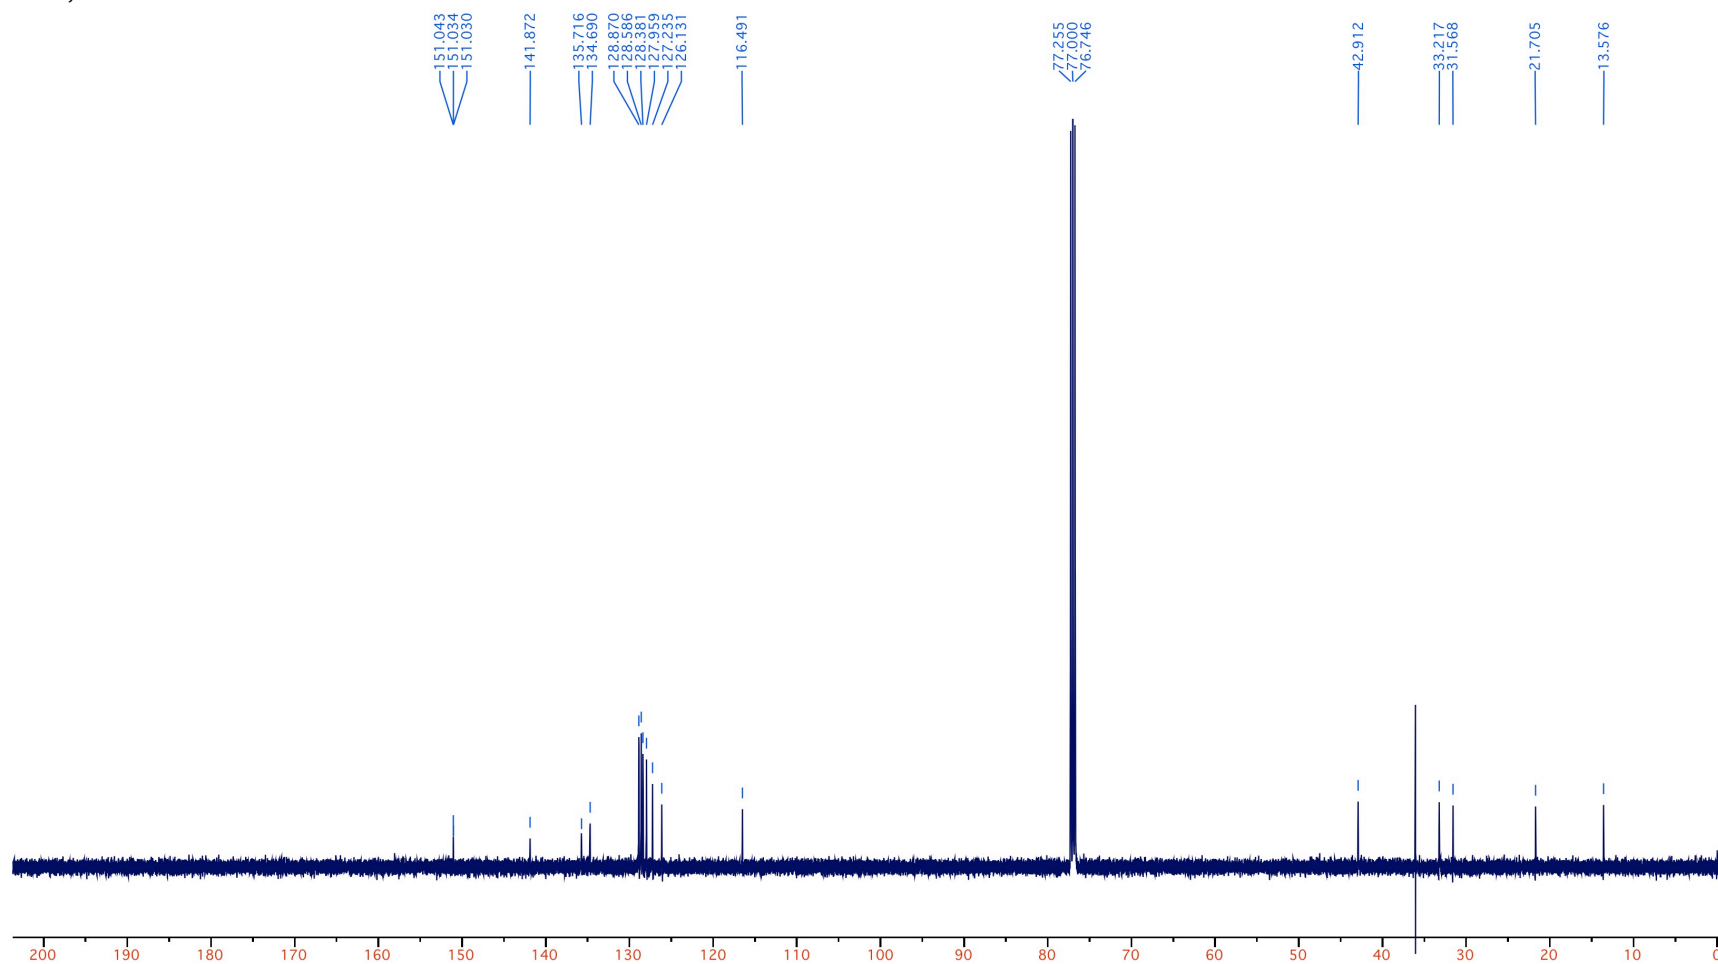

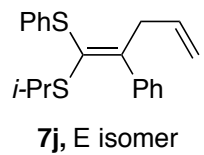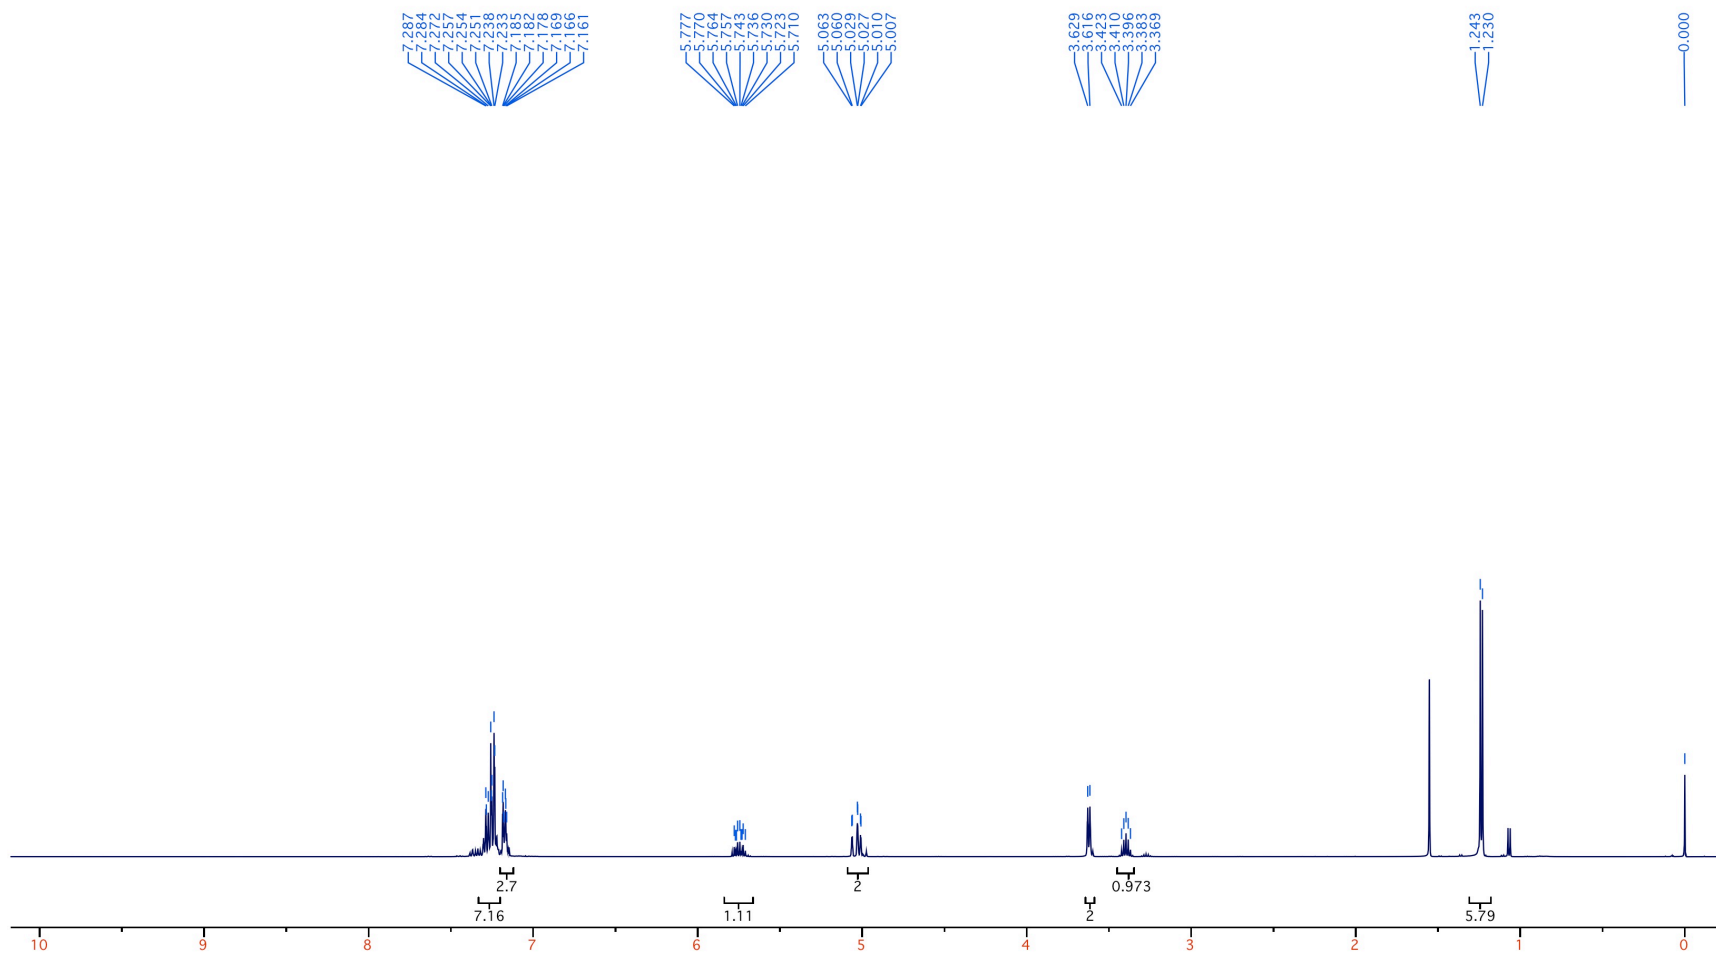

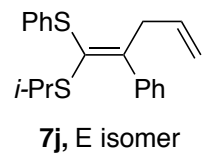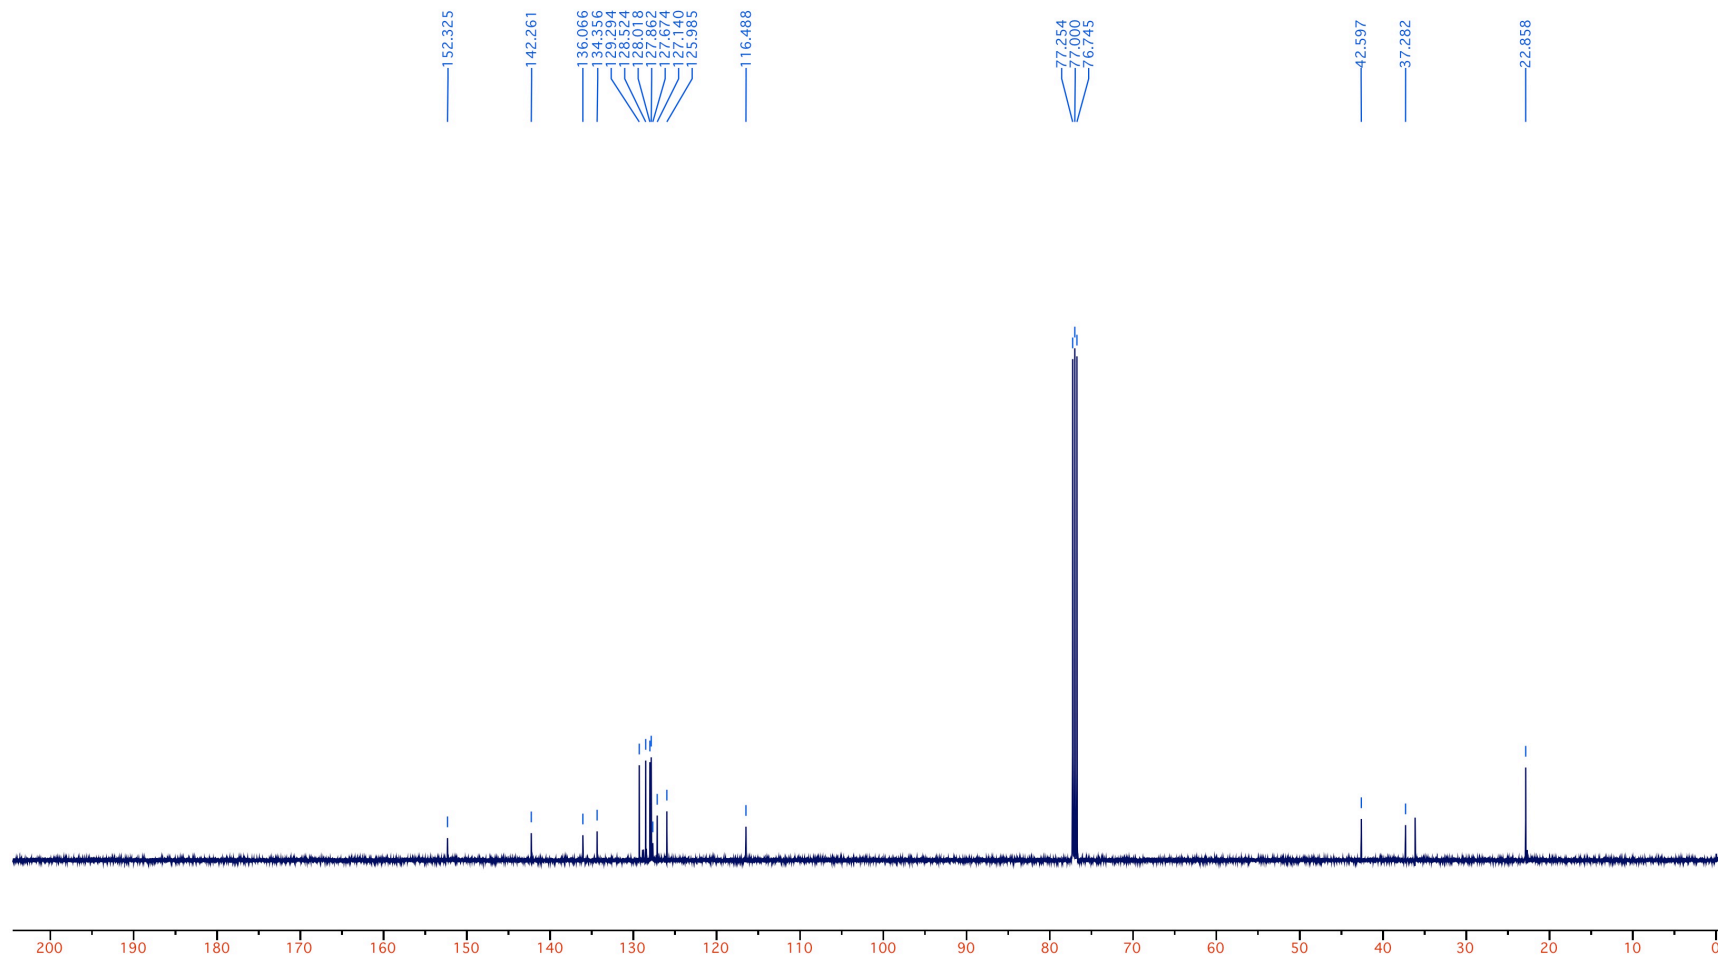

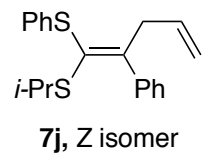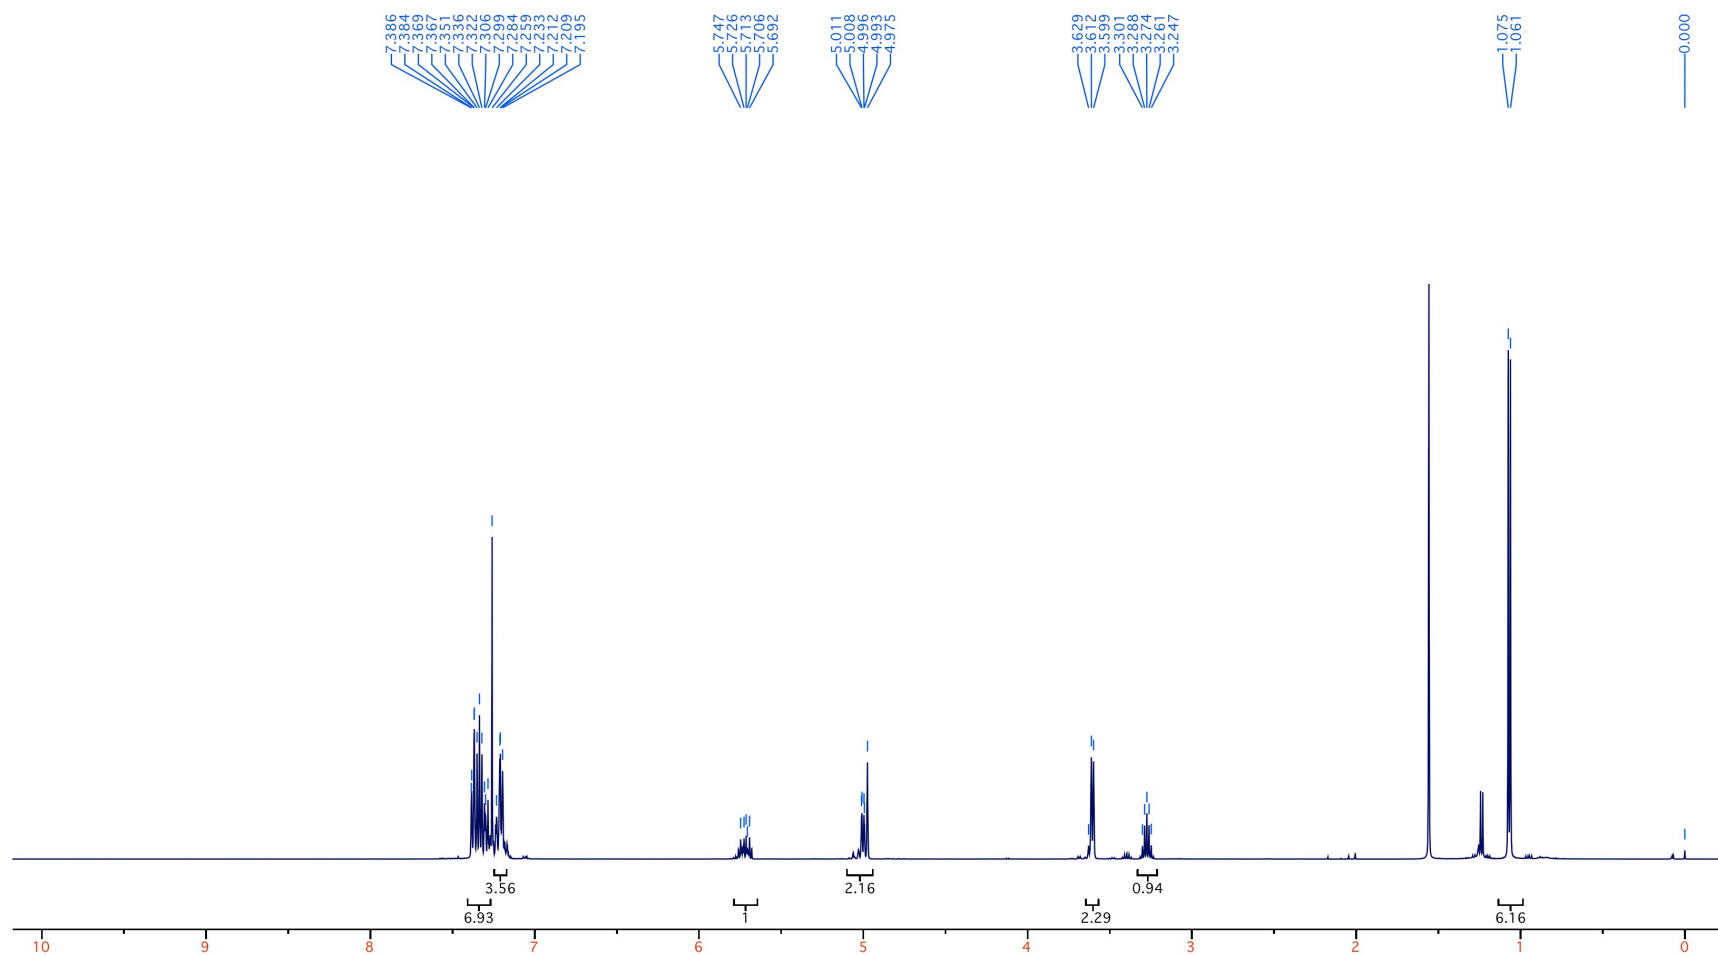



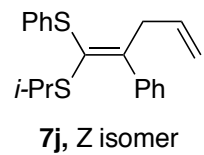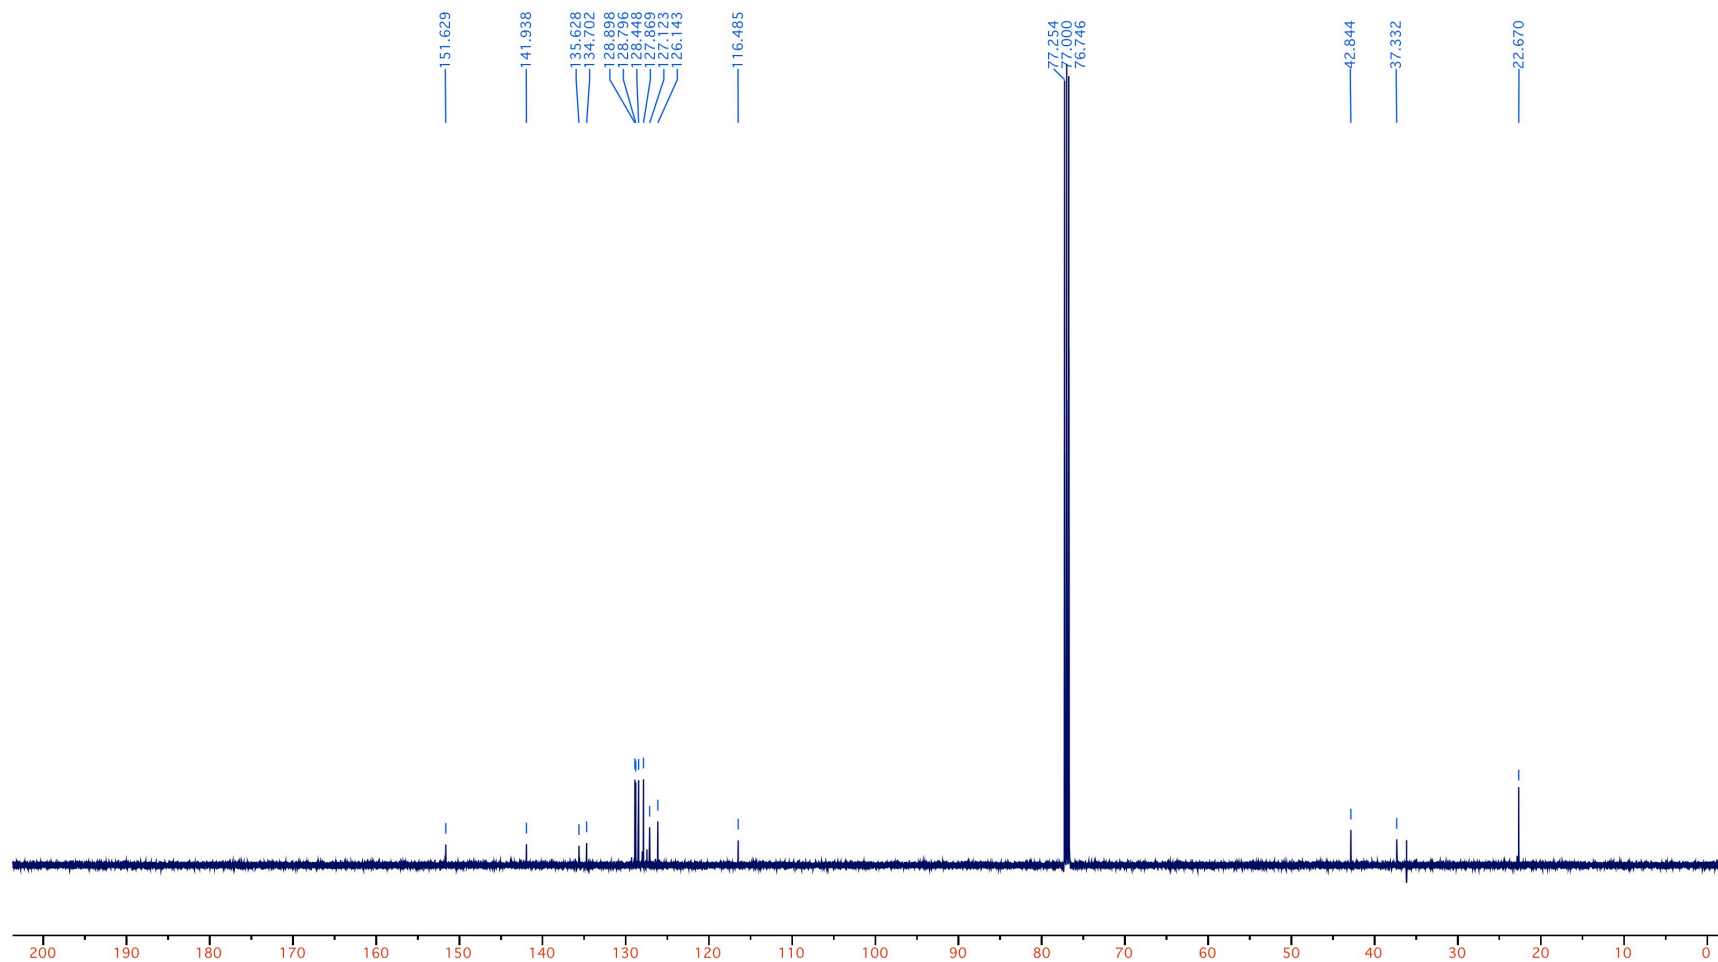

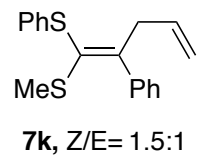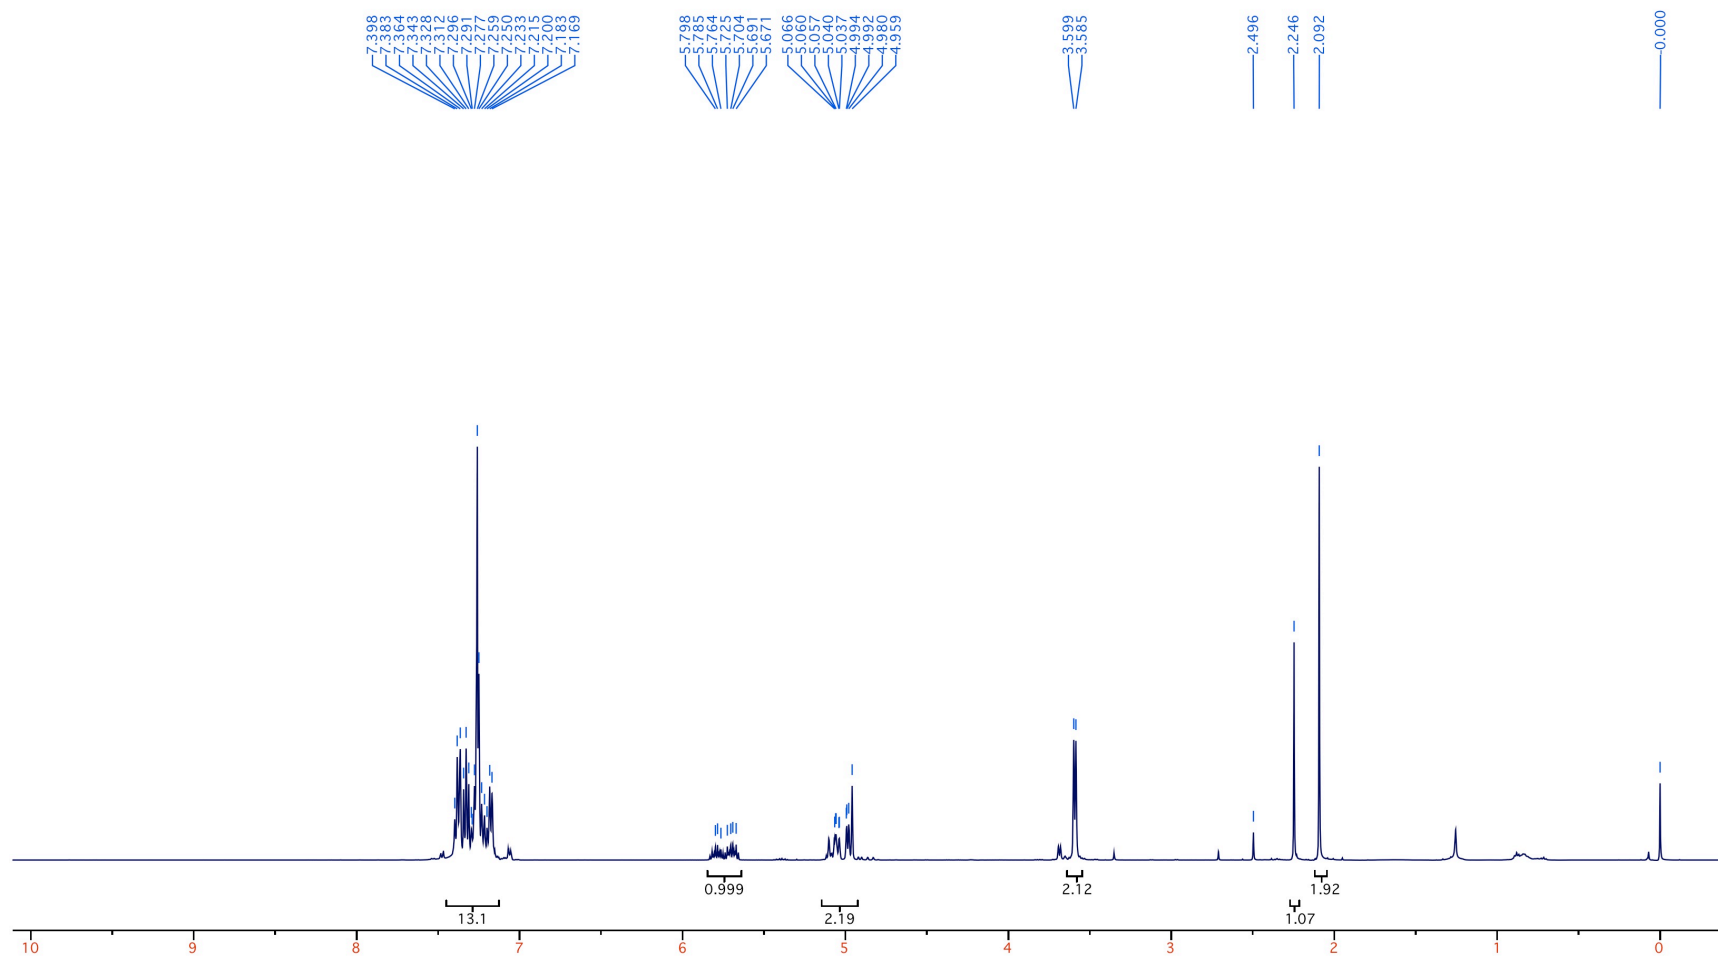





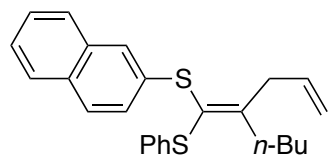

7I, Z/E= 1:1

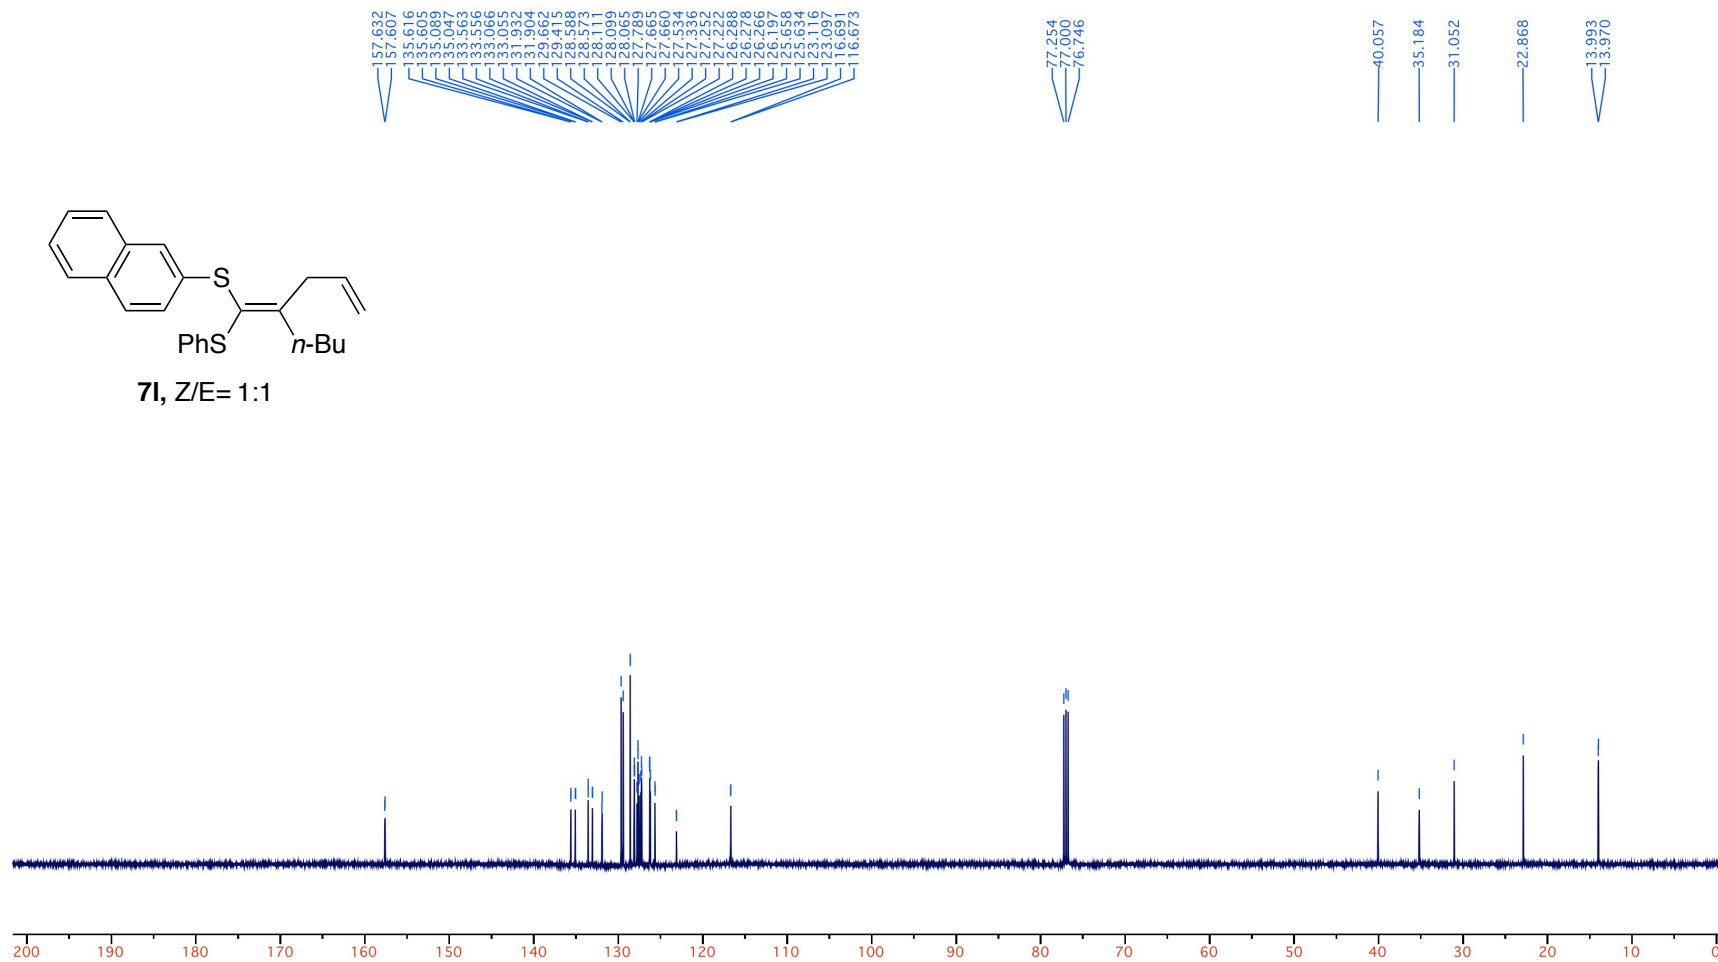

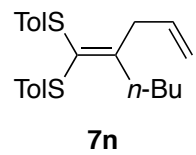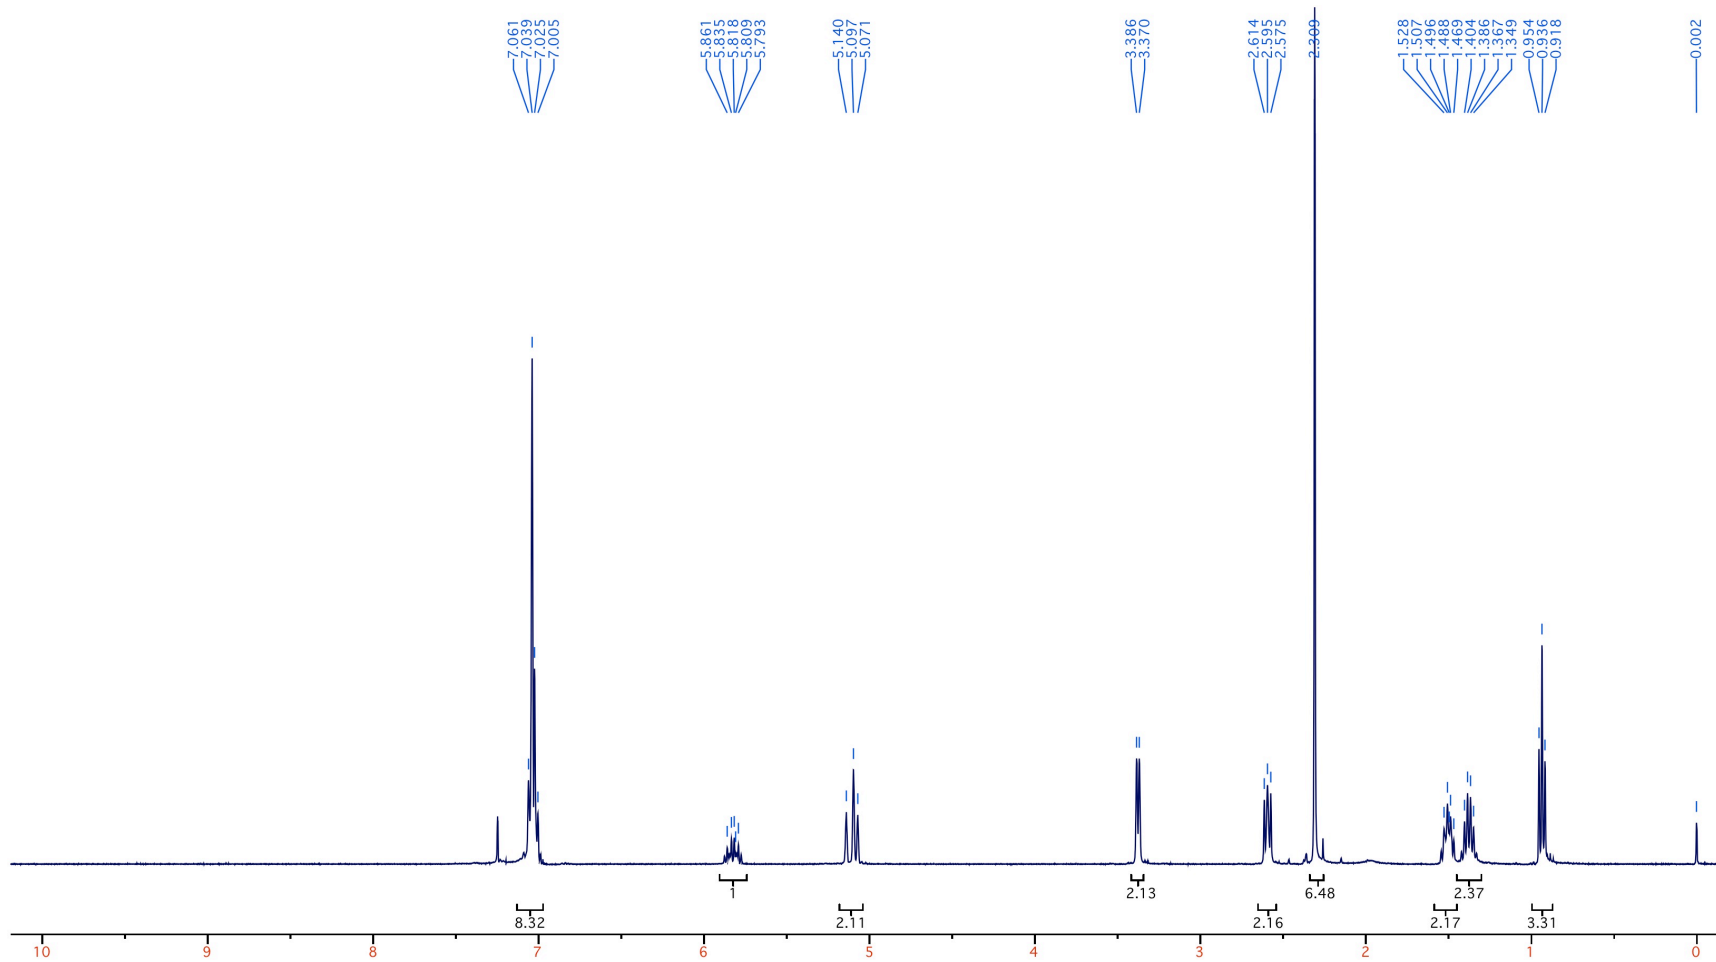

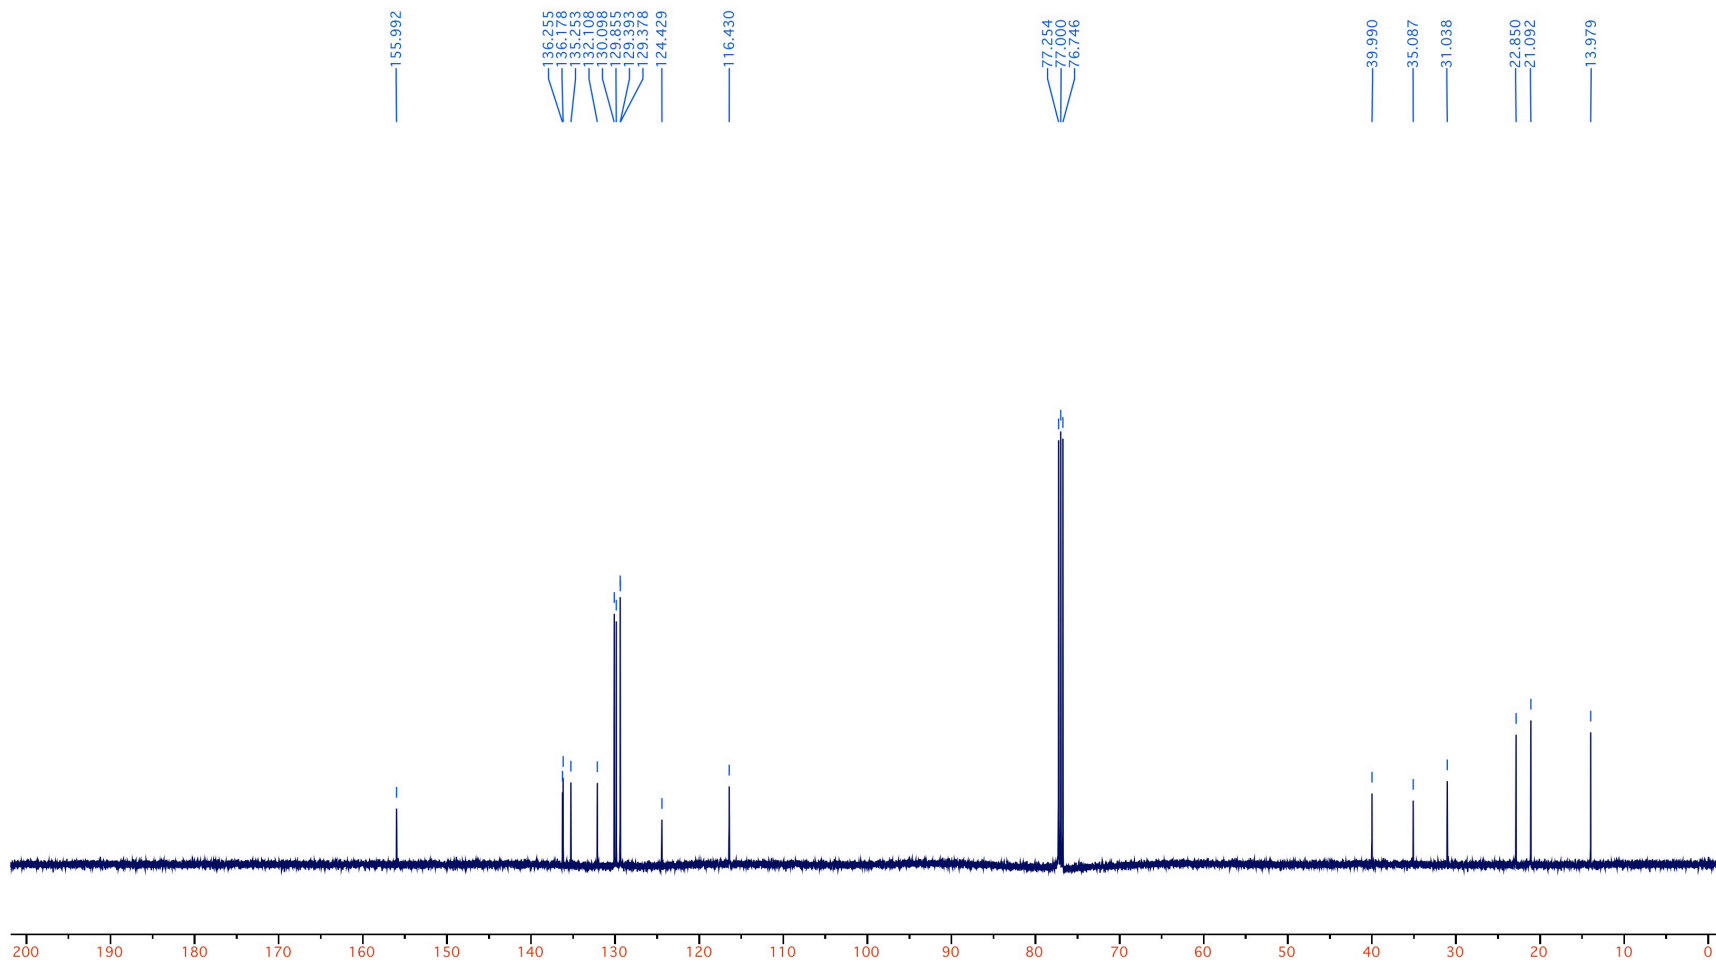

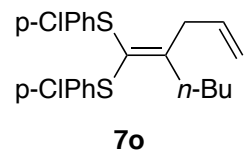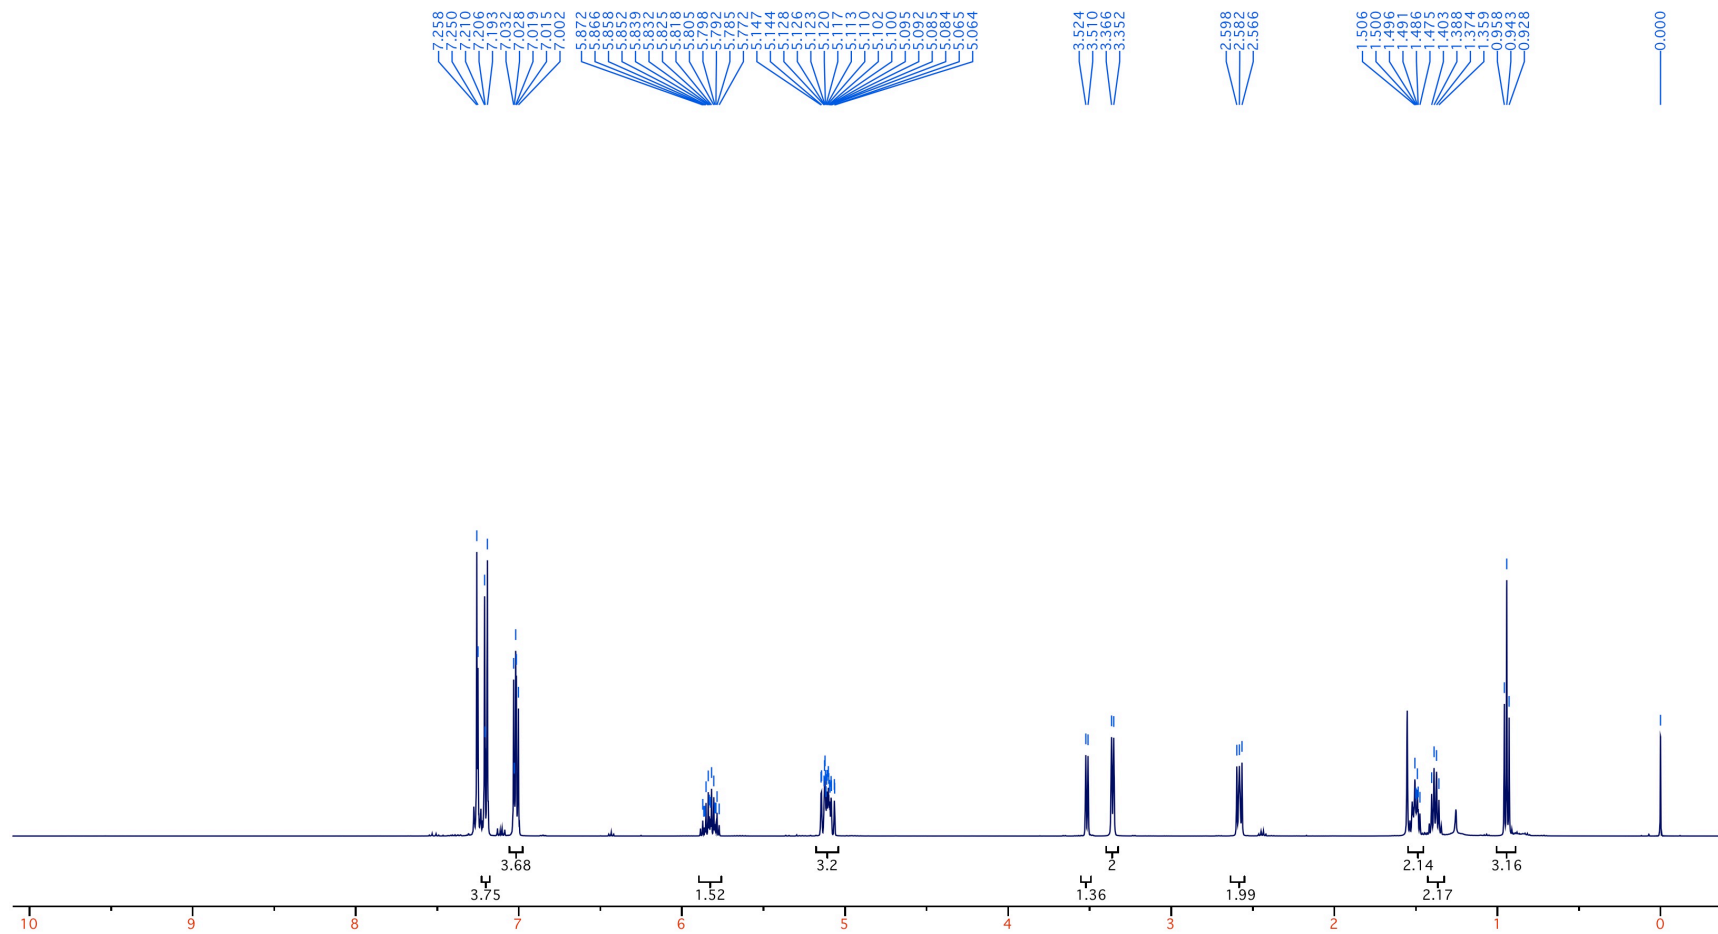



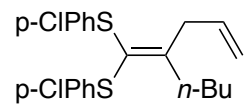

**7o**

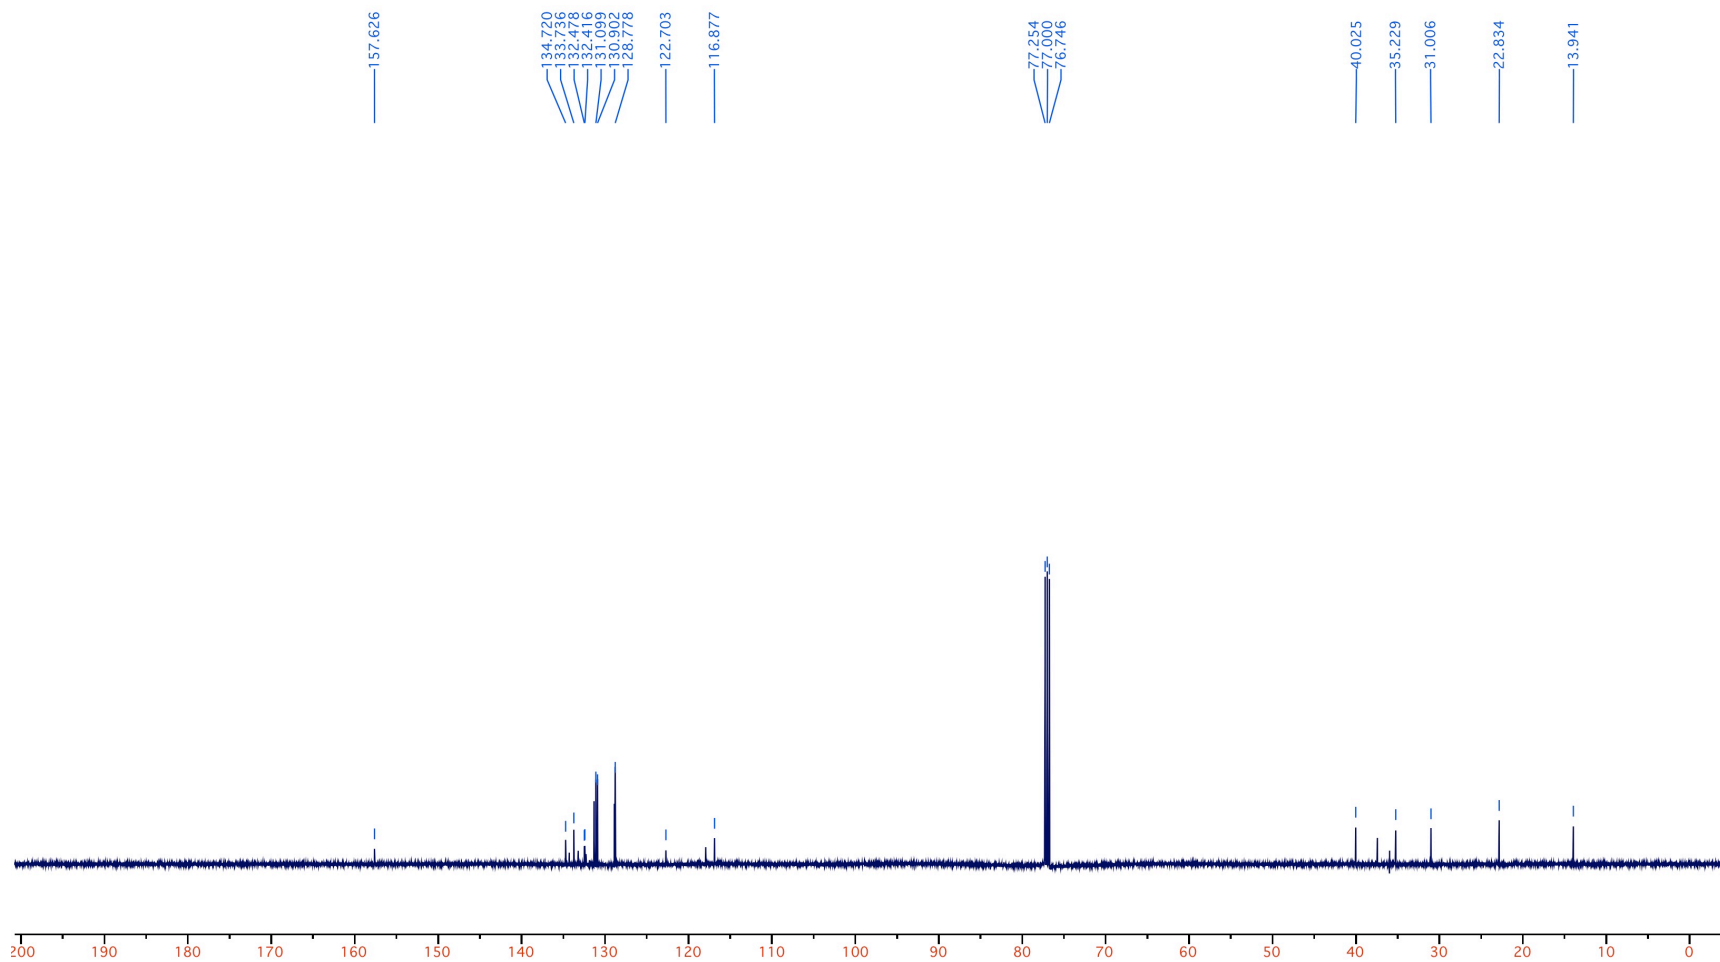

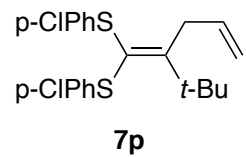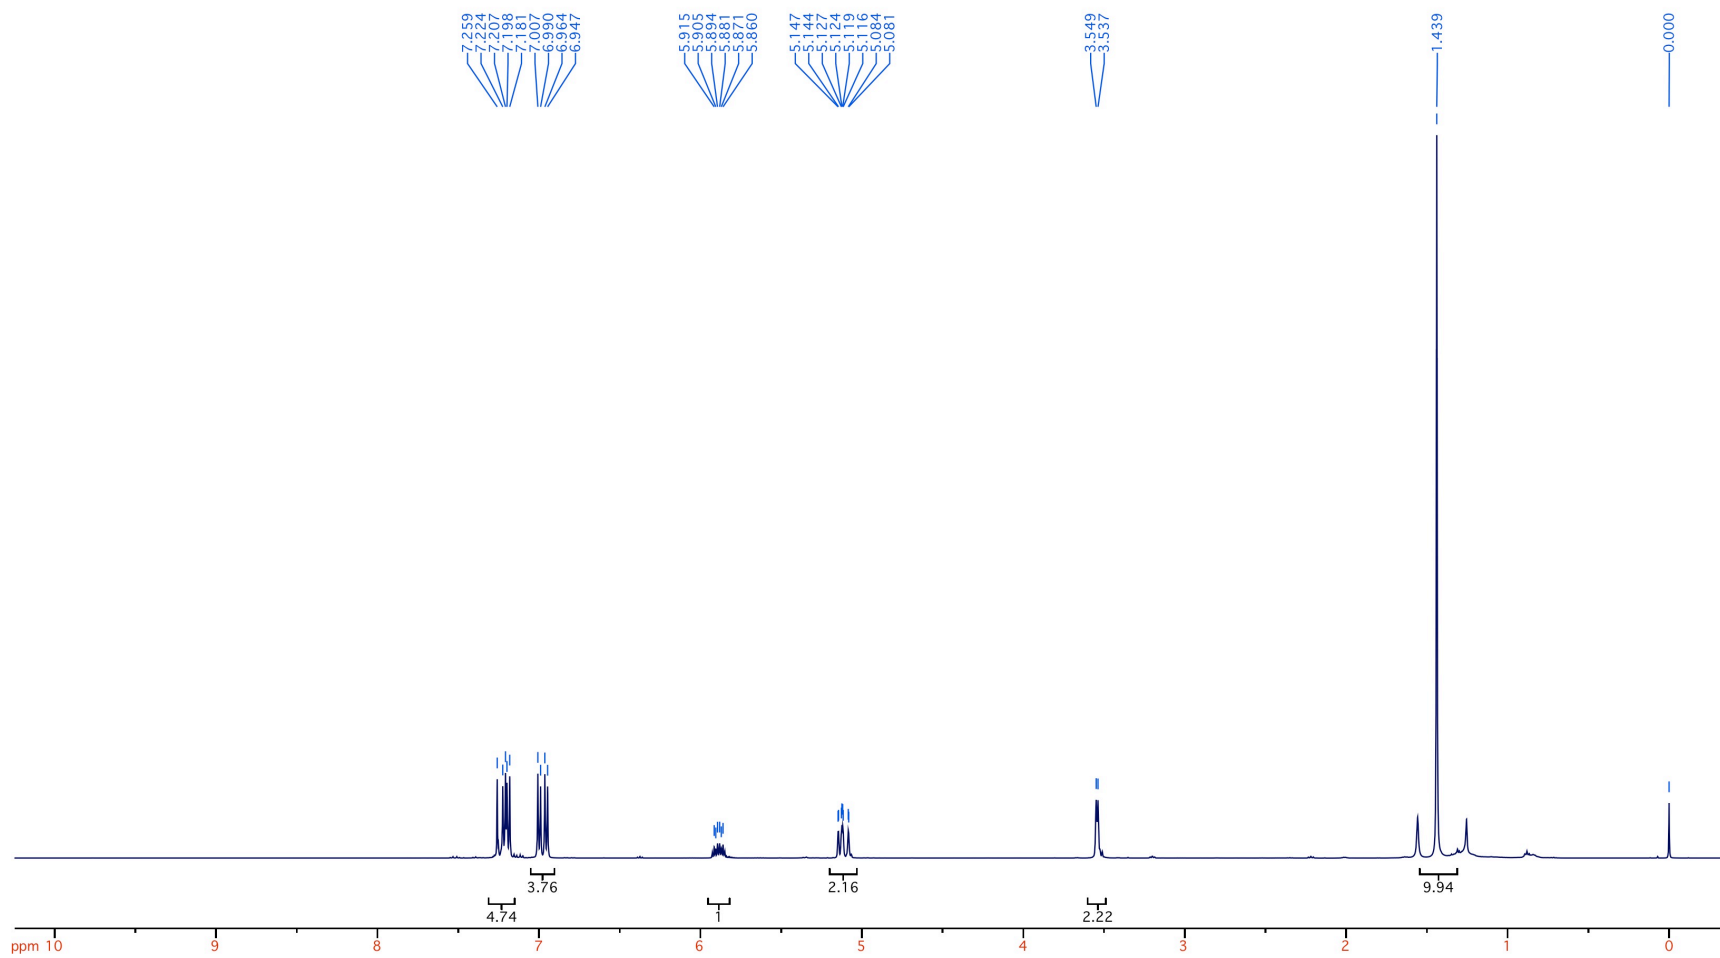

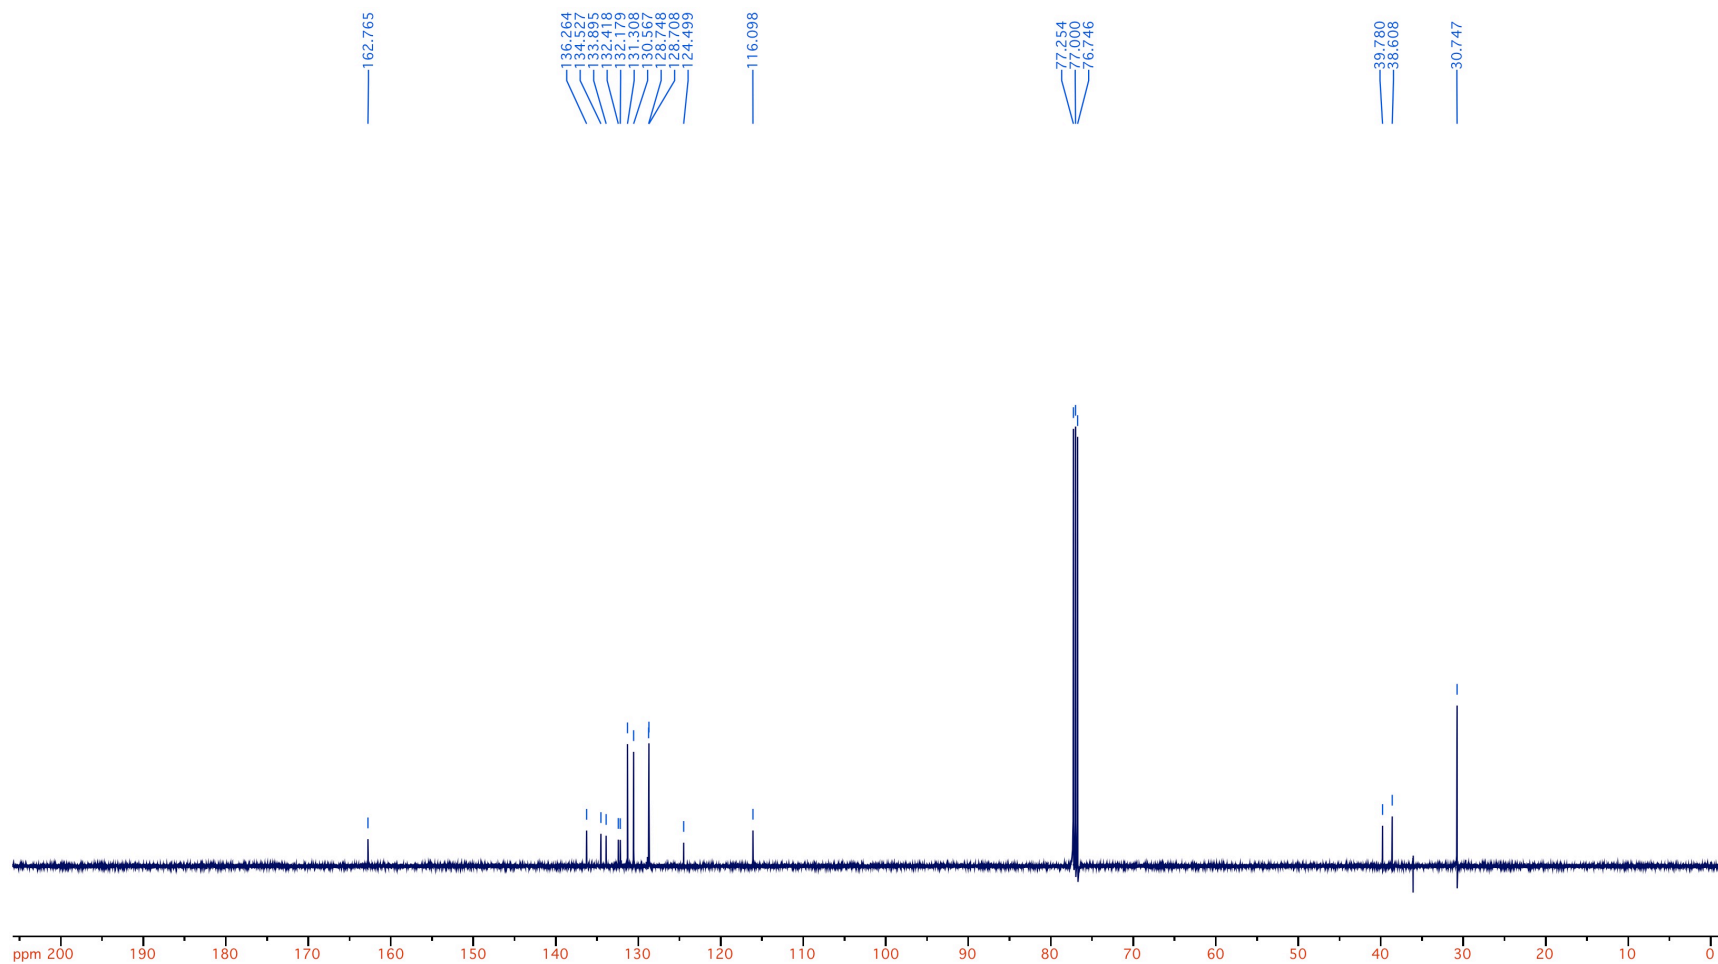

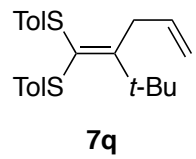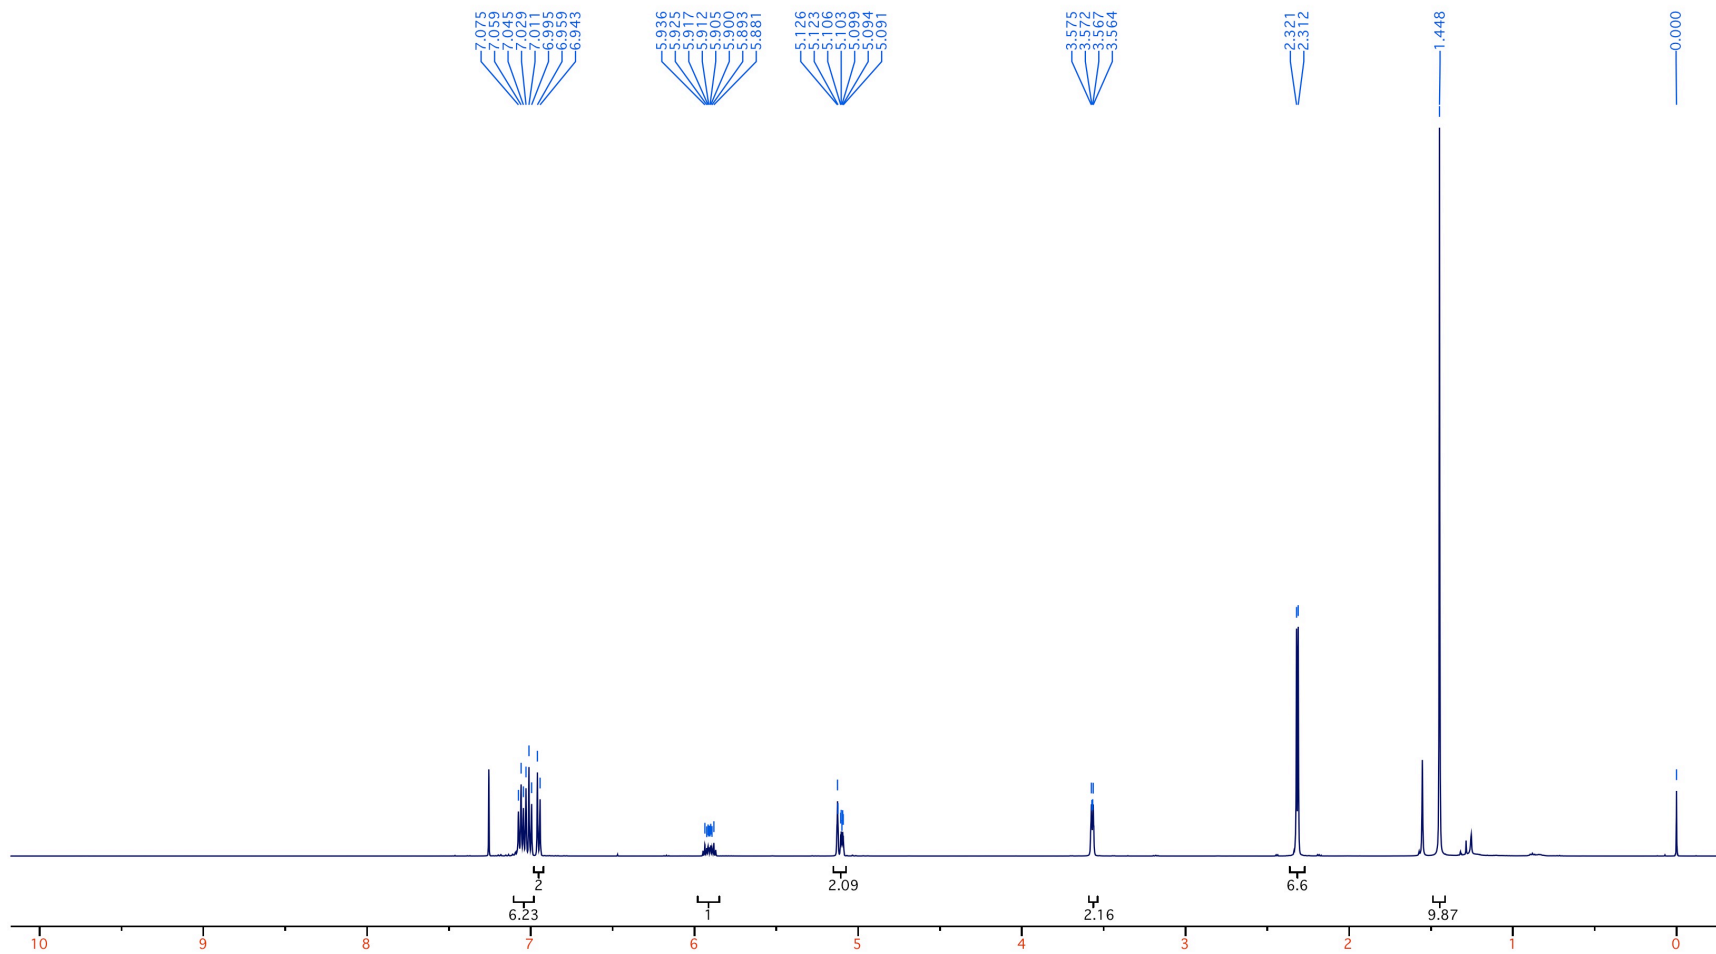

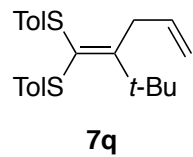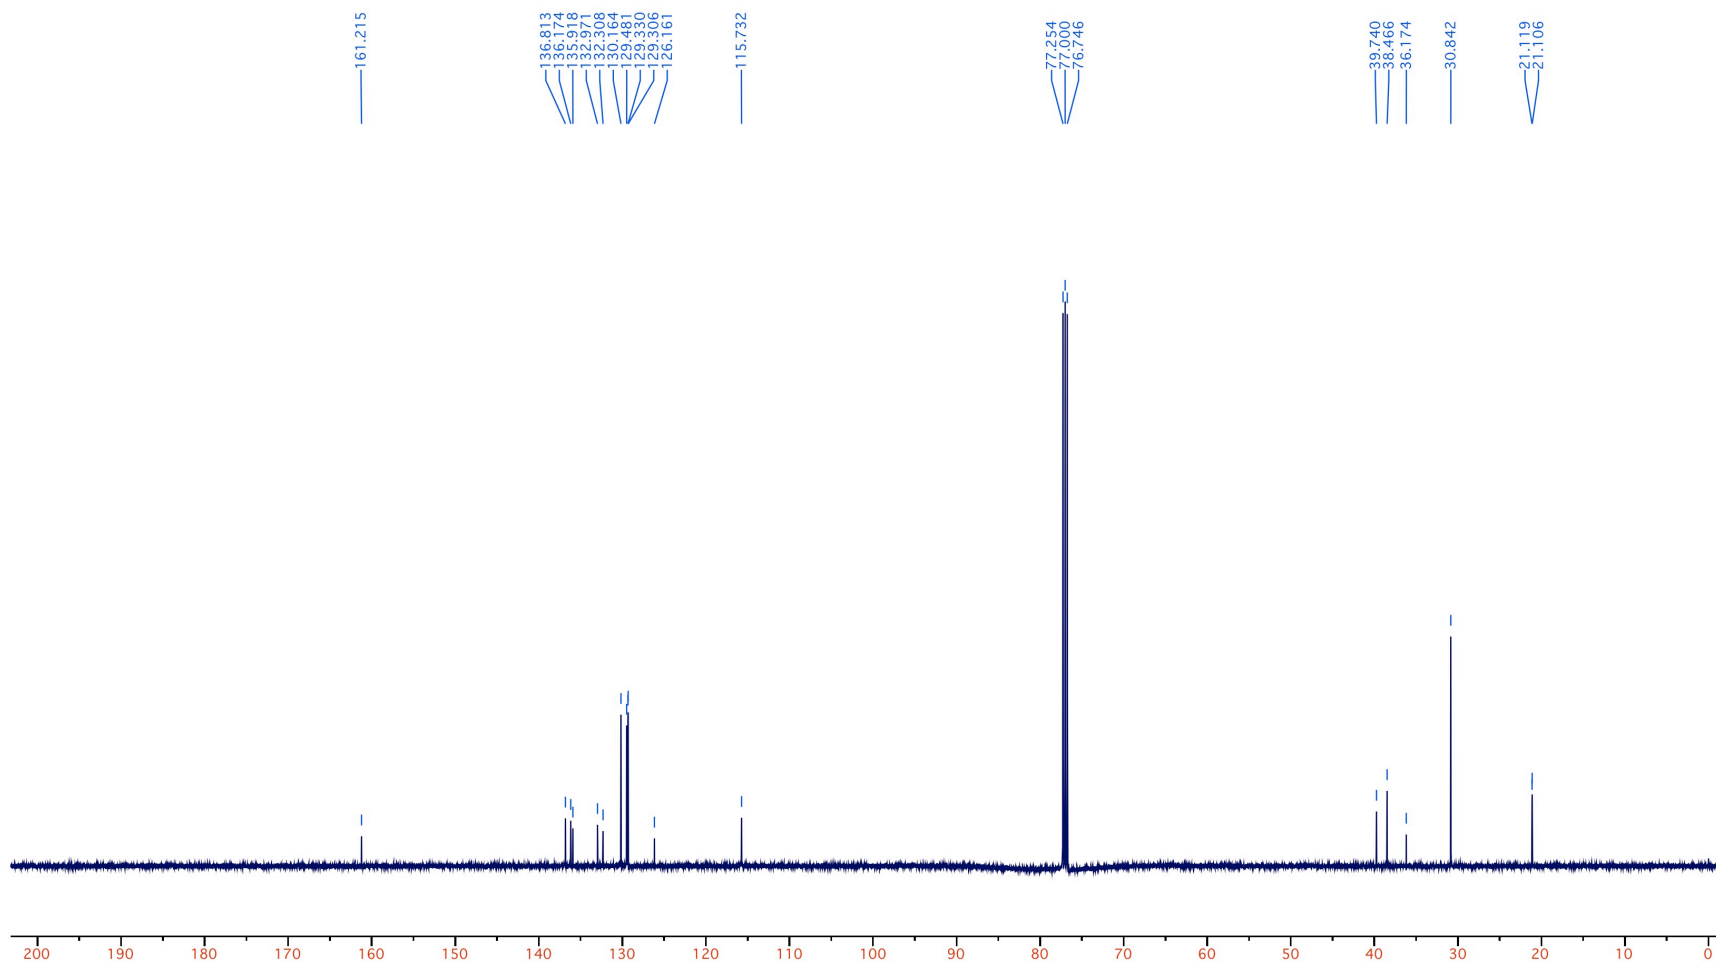

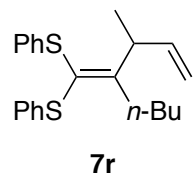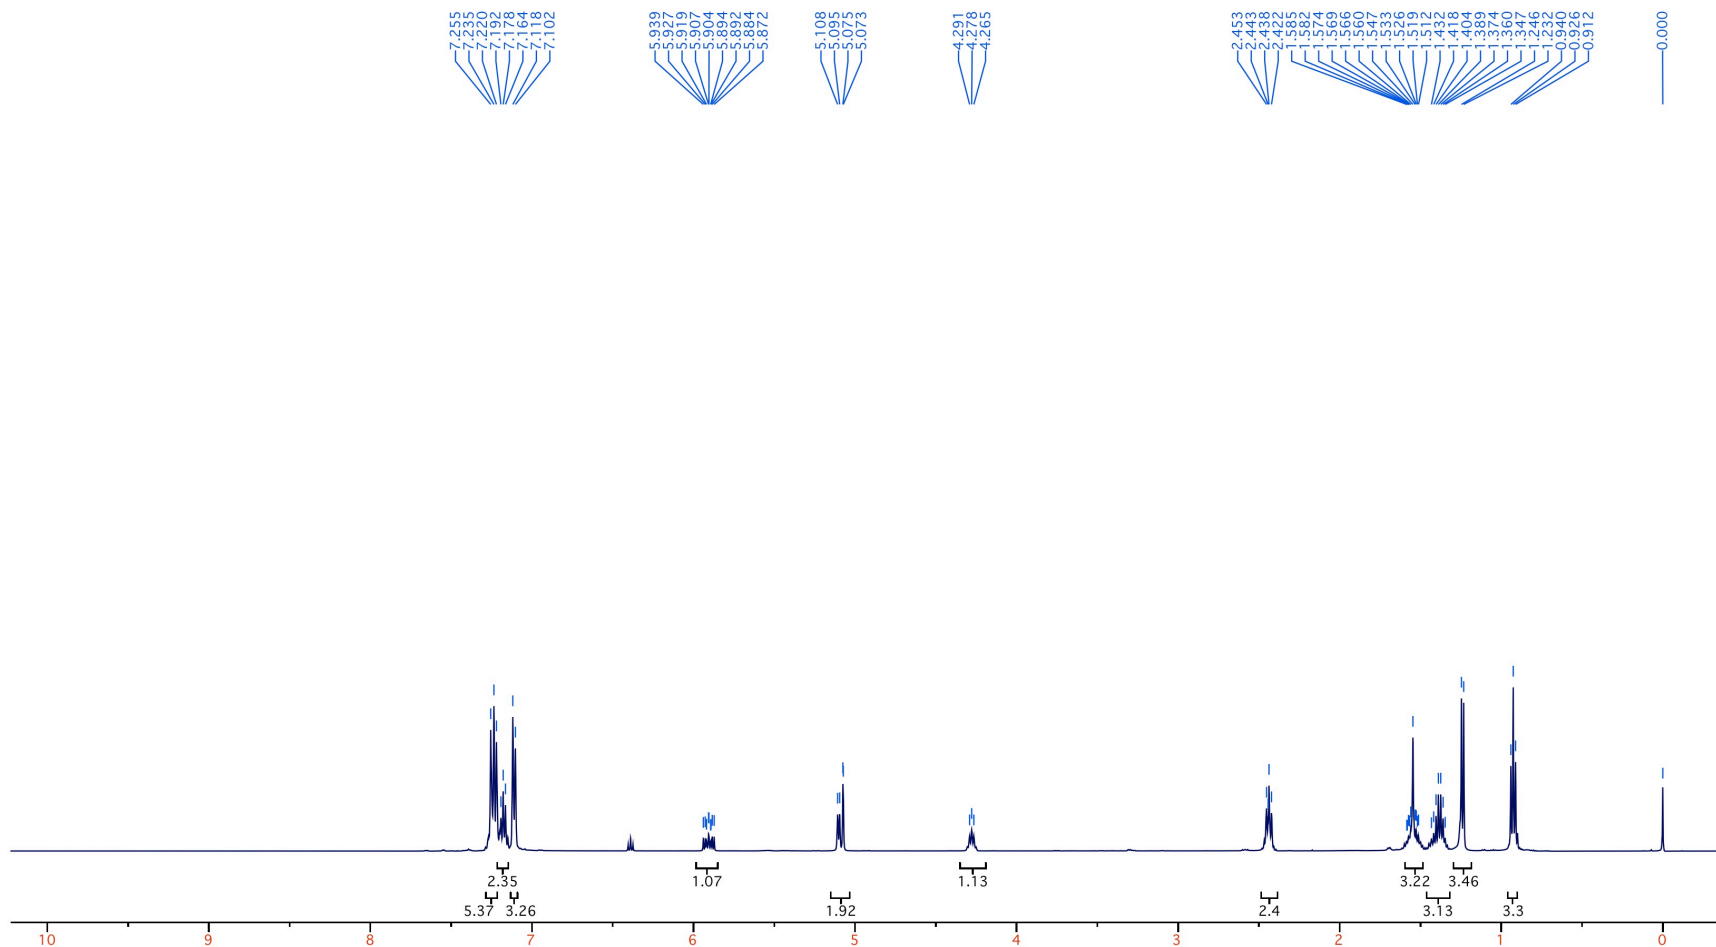

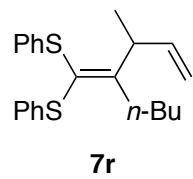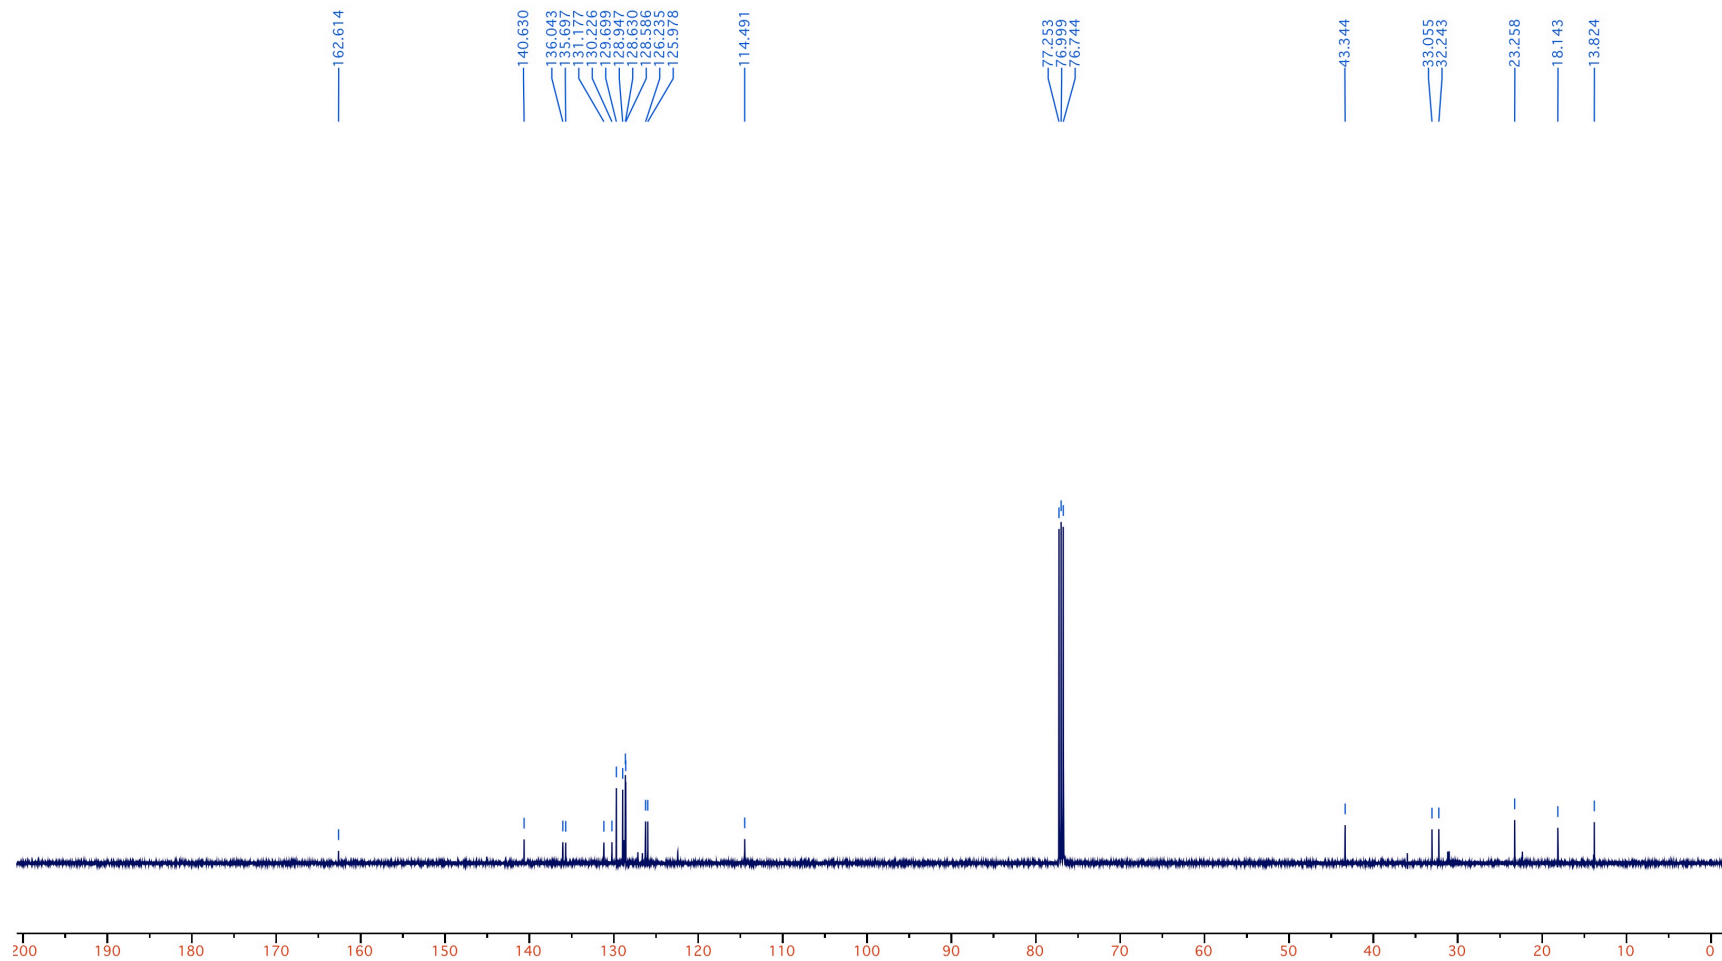

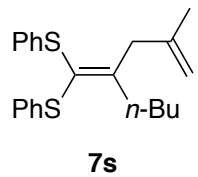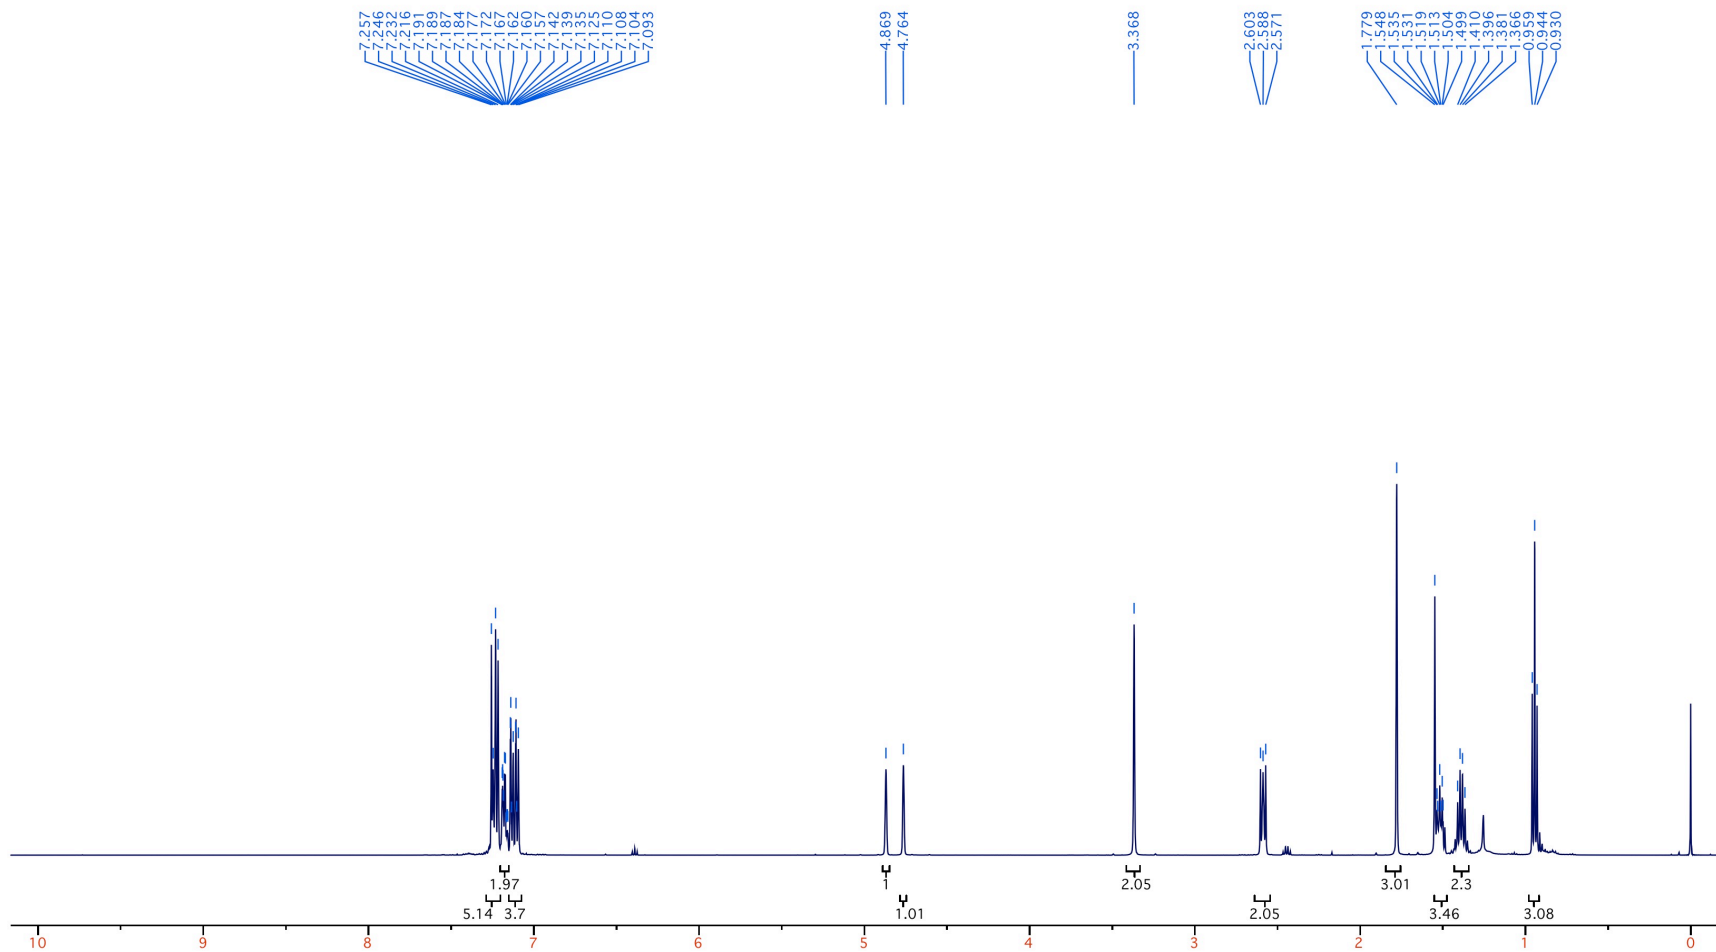



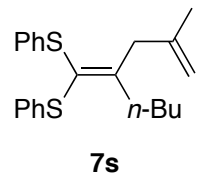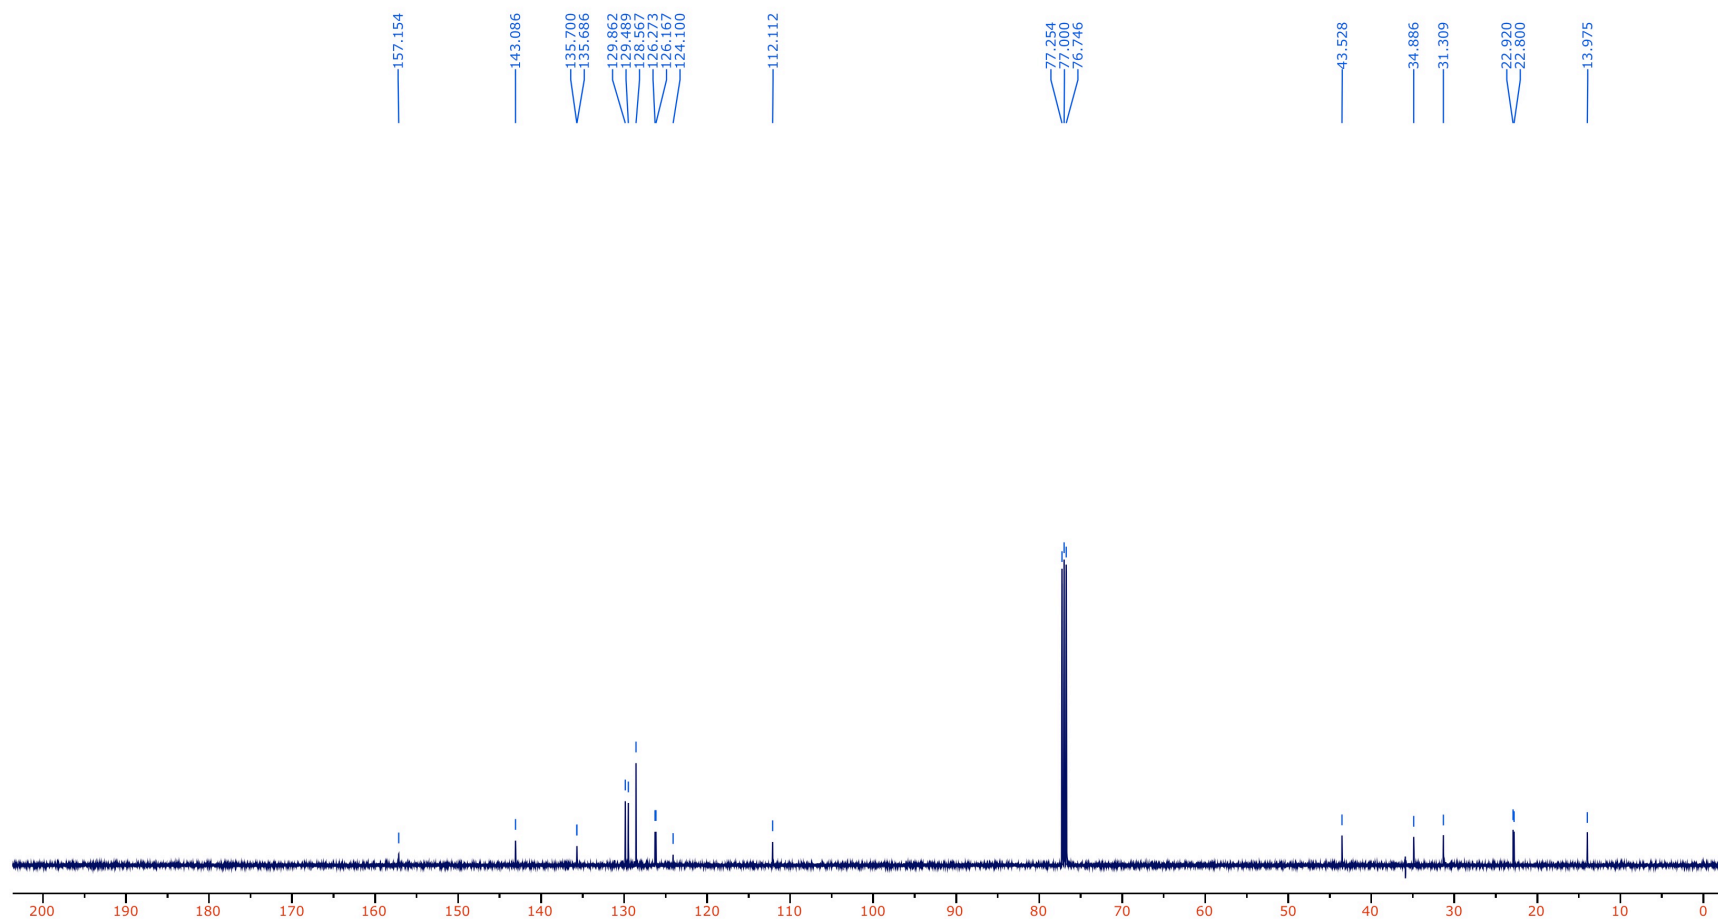

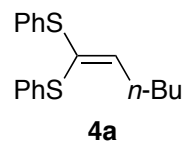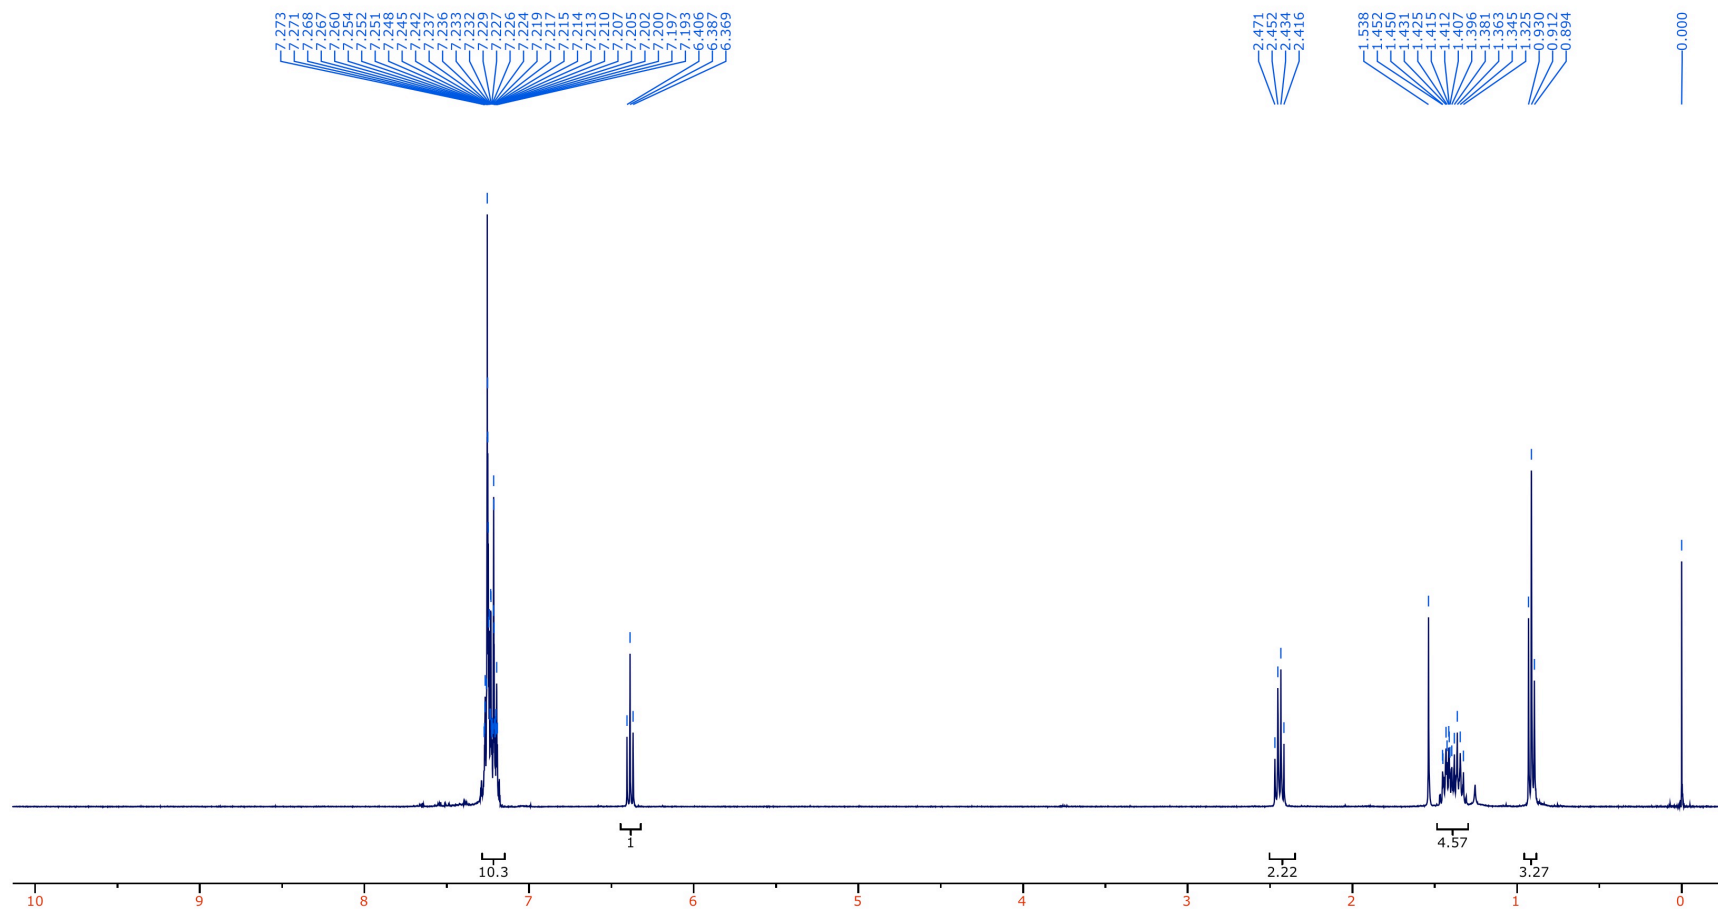

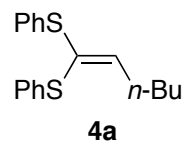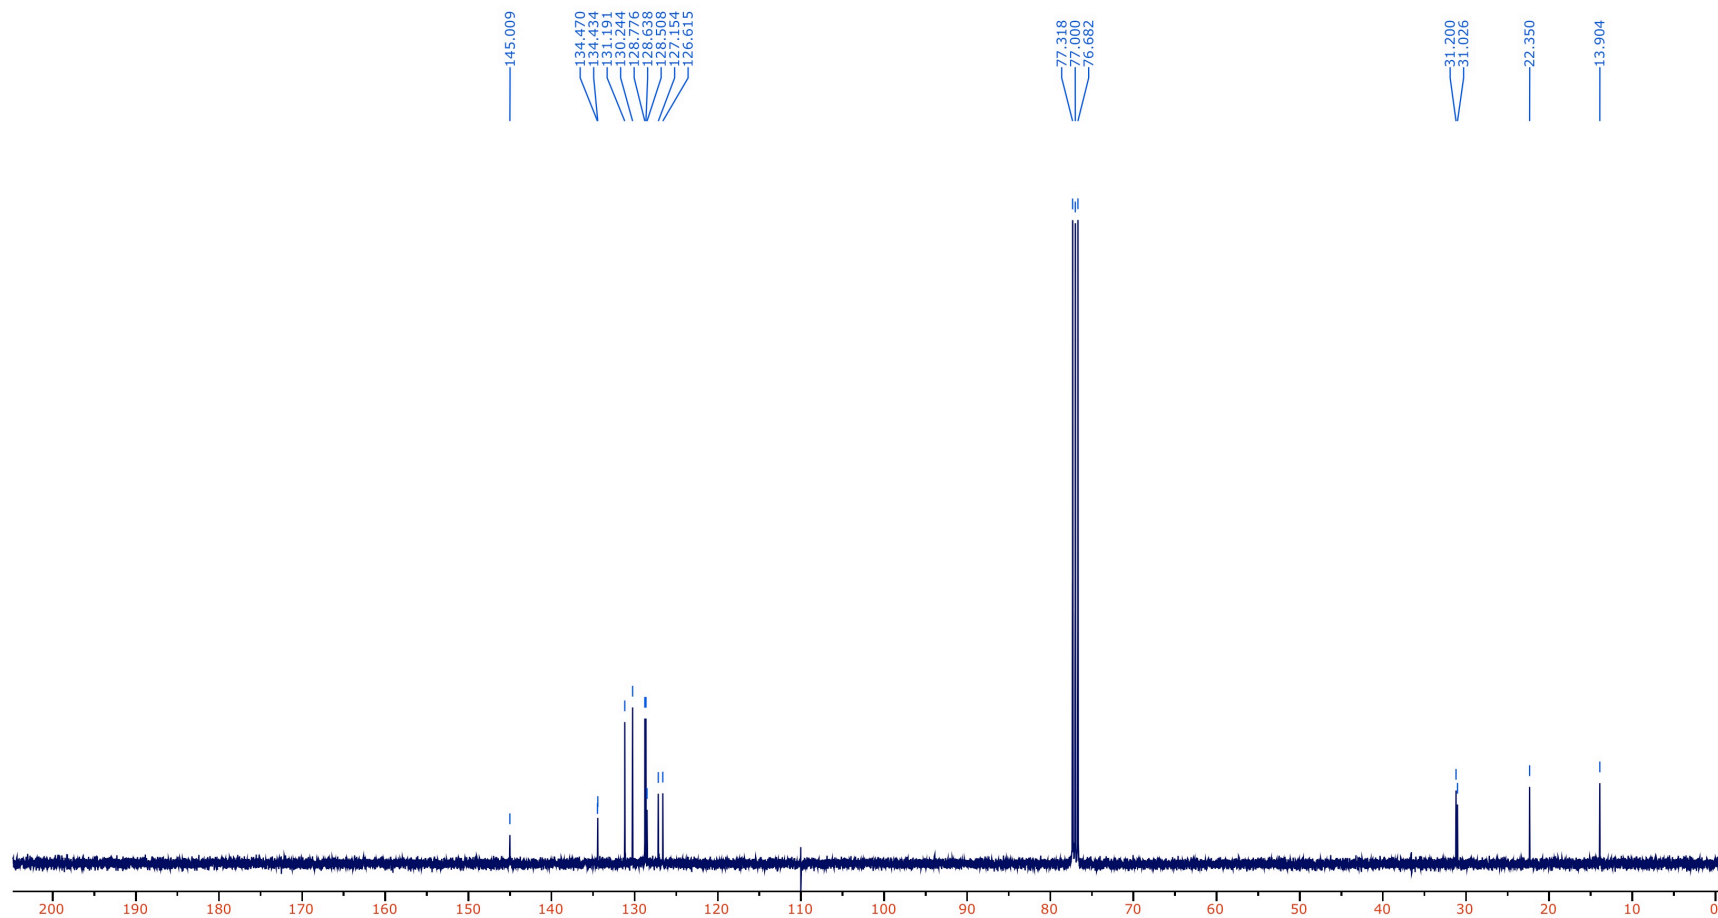

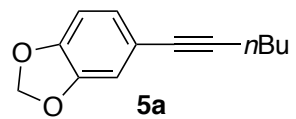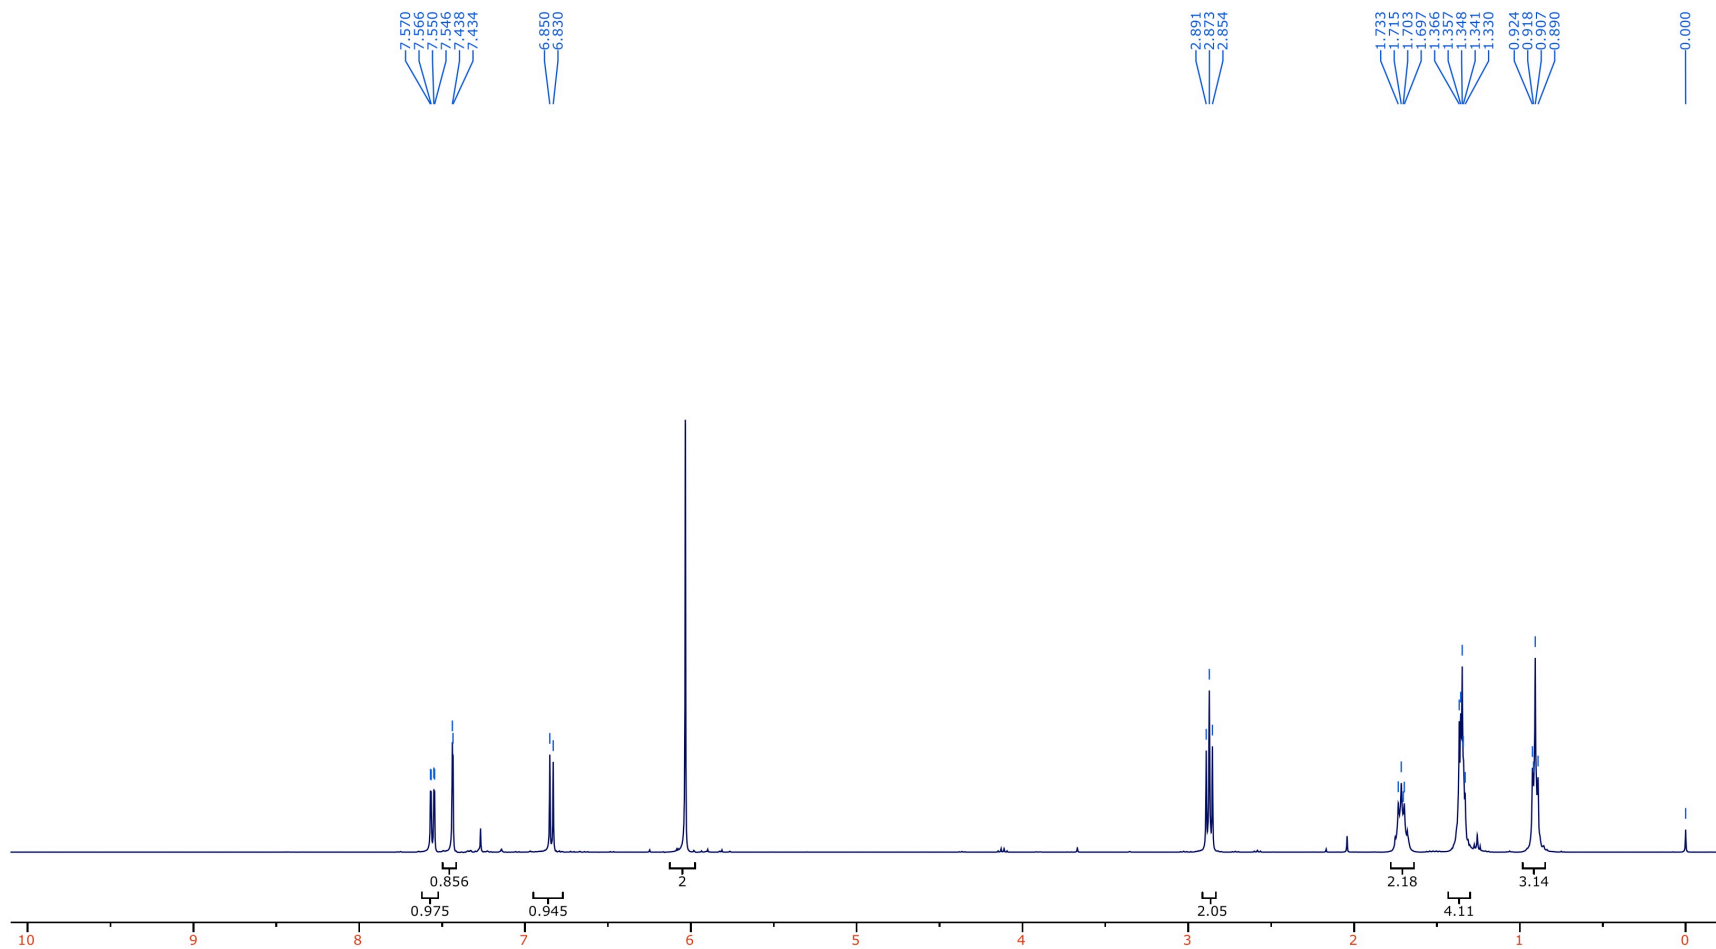

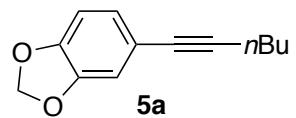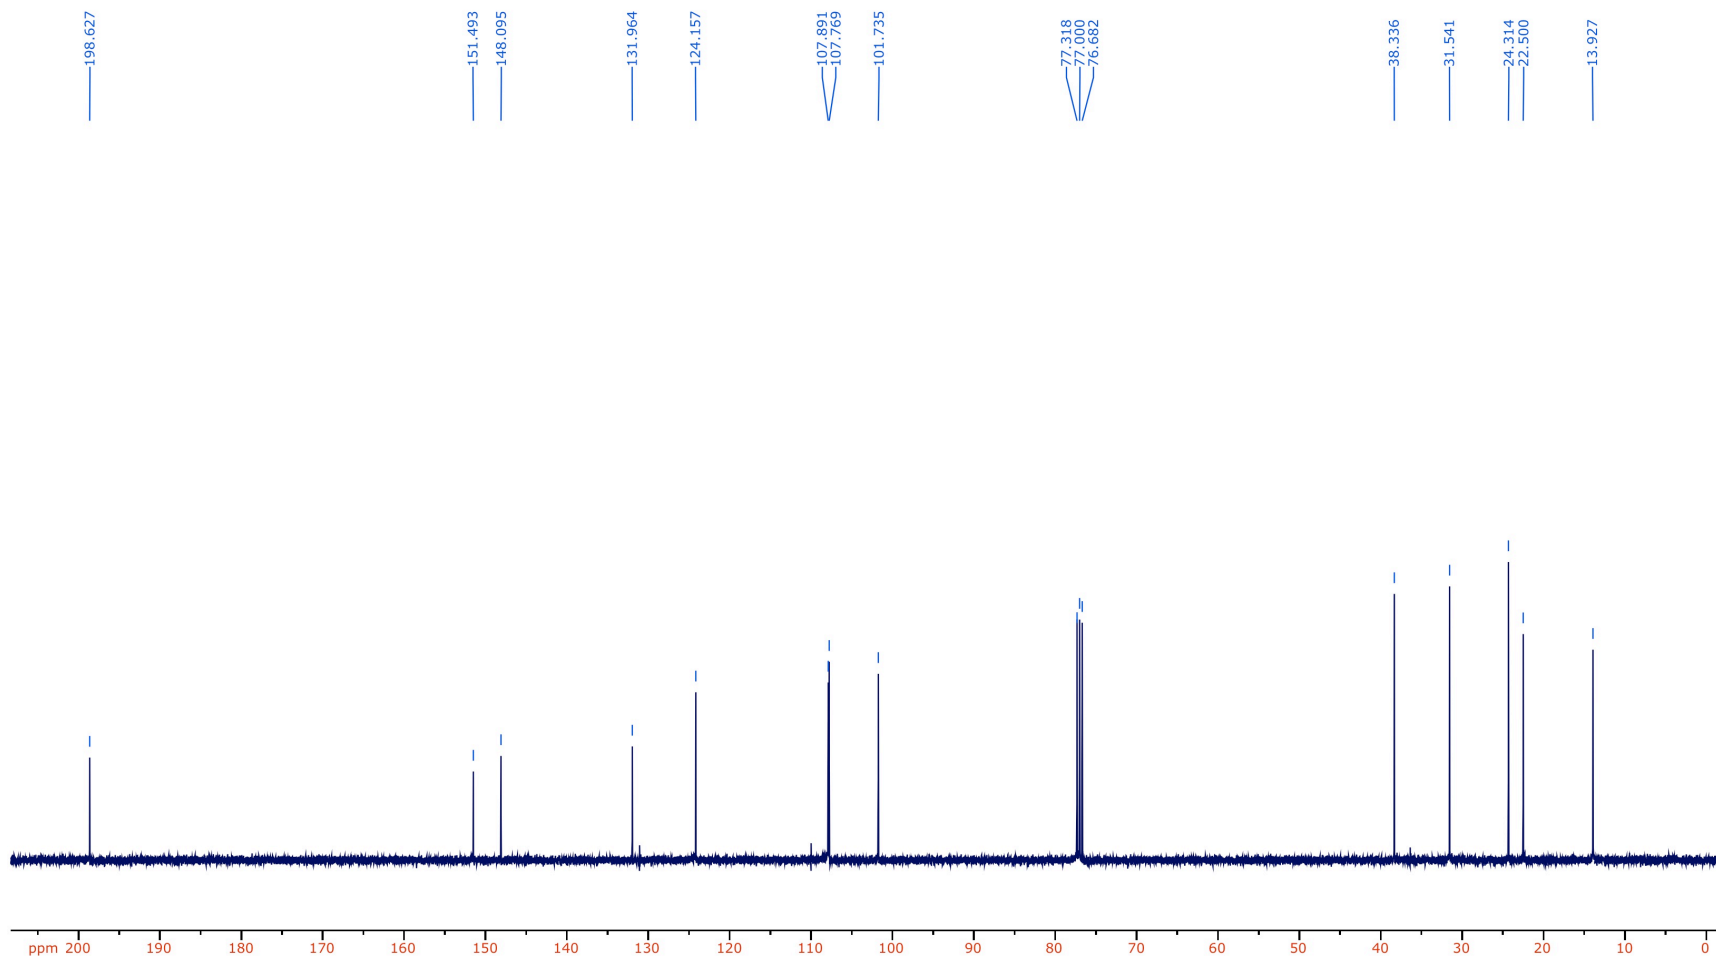

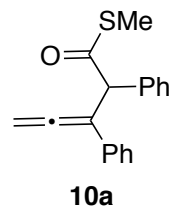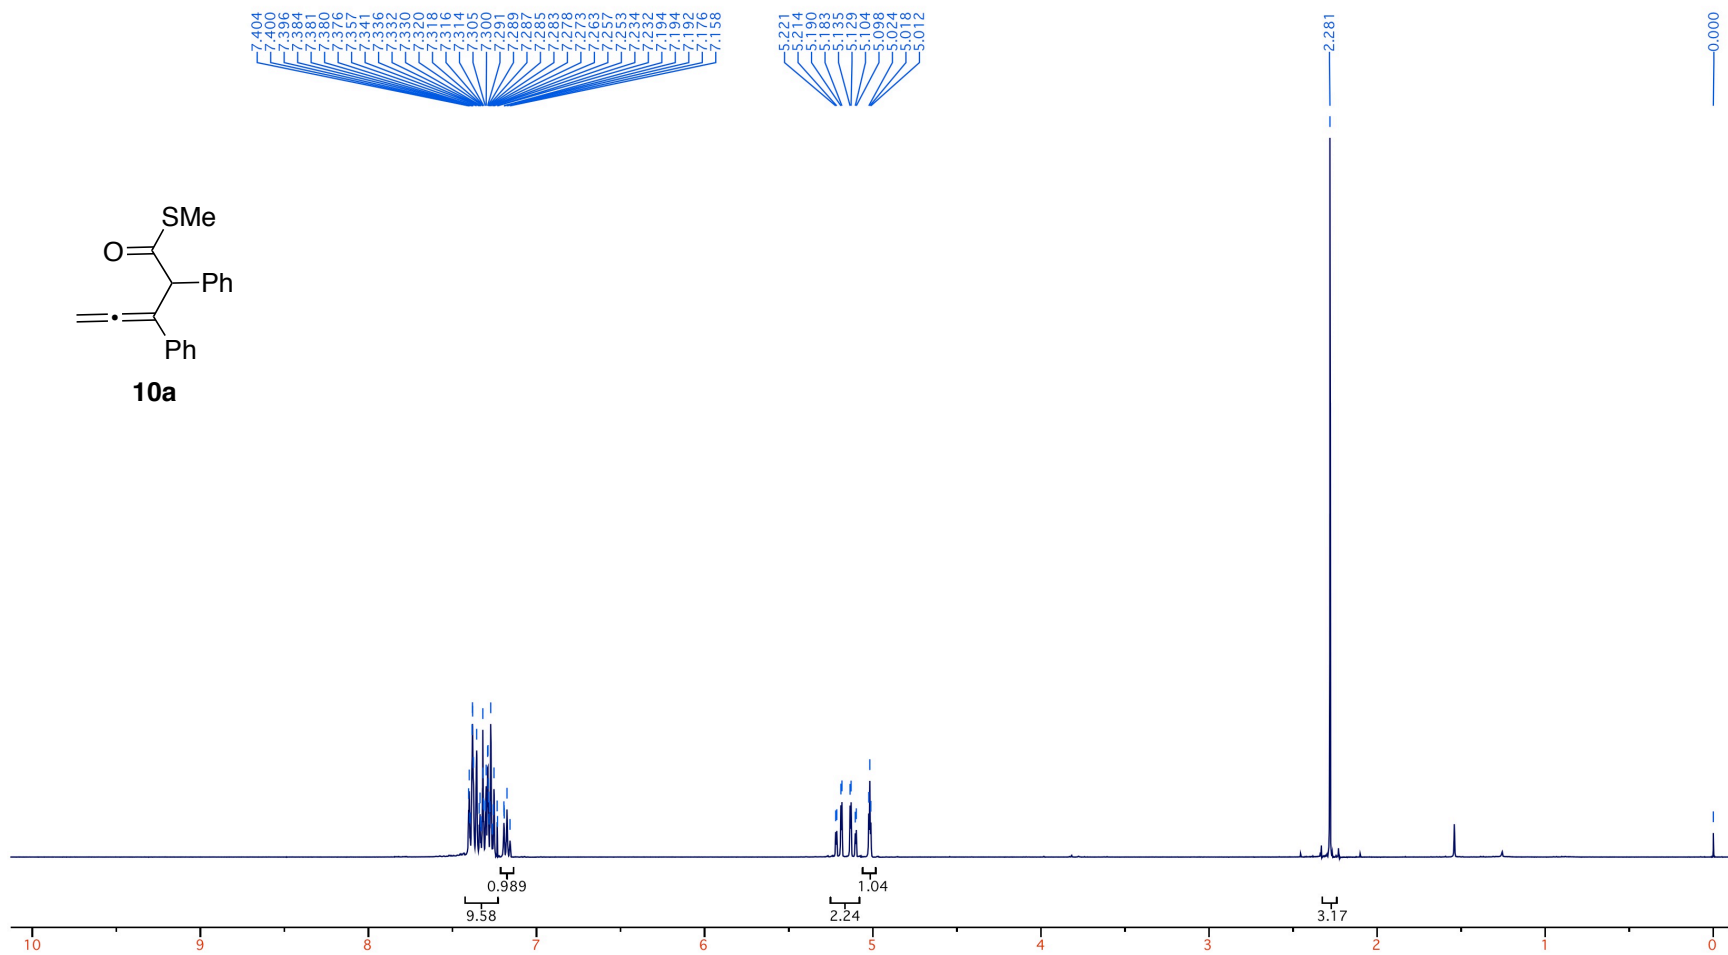

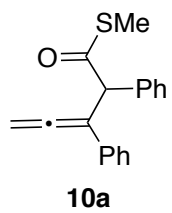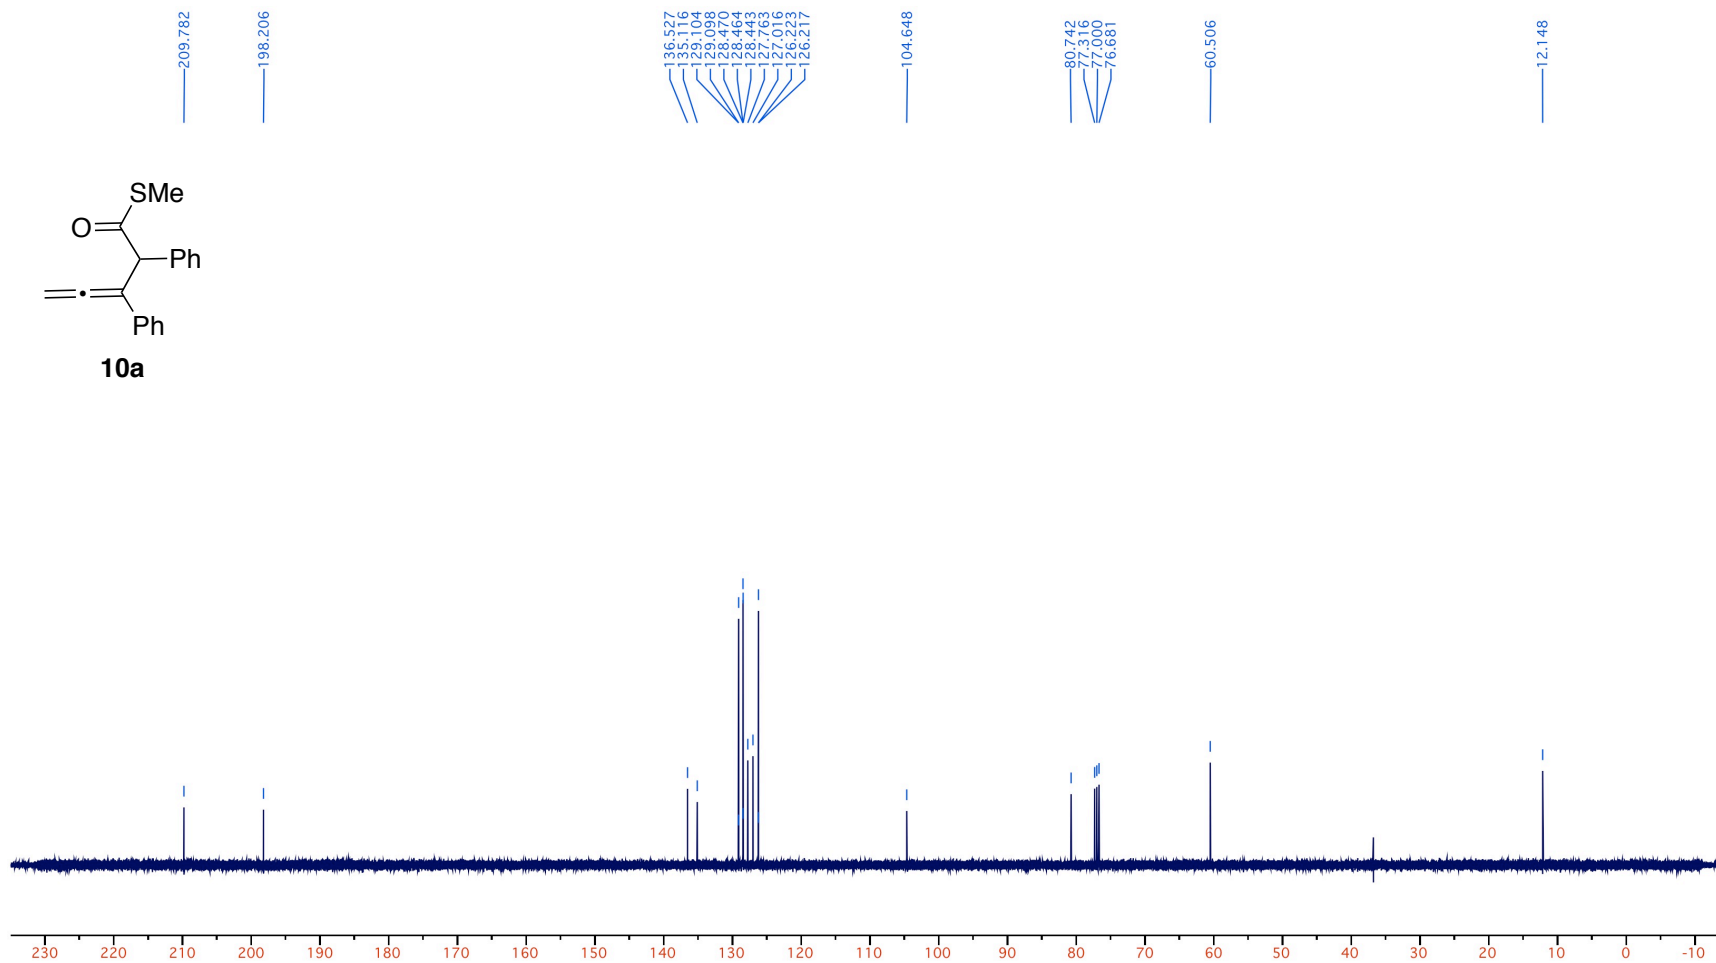

Supplement: NIHMS986274-supplement-supporting_information.pdf [file NIHMS986274-supplement-supporting_information.pdf]
